# Supplementary material for: Protocolized Post-Extubation Respiratory Support to prevent reintubation: protocol and statistical analysis plan for a clinical trial
Source: PubMed Central journal article supplement — BMJ Open. 2019 Aug 2;9(8):e030476. doi: 10.1136/bmjopen-2019-030476 (PMC6687016; doi:10.1136/bmjopen-2019-030476), 2019-08-02

# BMJ Open

BMJ Open is committed to open peer review. As part of this commitment we make the peer review history of every article we publish publicly available.

When an article is published we post the peer reviewers' comments and the authors' responses online. We also post the versions of the paper that were used during peer review. These are the versions that the peer review comments apply to.

The versions of the paper that follow are the versions that were submitted during the peer review process. They are not the versions of record or the final published versions. They should not be cited or distributed as the published version of this manuscript.

BMJ Open is an open access journal and the full, final, typeset and author-corrected version of record of the manuscript is available on our site with no access controls, subscription charges or pay-per-view fees (<http://bmjopen.bmj.com>).

If you have any questions on BMJ Open's open peer review process please email [info.bmjopen@bmj.com](mailto:info.bmjopen@bmj.com)

# BMJ Open

## Protocolized Post-Extubation Respiratory Support to Prevent Reintubation: Protocol and Statistical Analysis Plan for a Clinical Trial

|                               |                                                                                                                                                                                                                                                                                                                                                                                                                                                                                                                                                                                                                                                                                                                                                                                                                                                                                                                                                                                                                                                                                                                                                                                                                                                |
|-------------------------------|------------------------------------------------------------------------------------------------------------------------------------------------------------------------------------------------------------------------------------------------------------------------------------------------------------------------------------------------------------------------------------------------------------------------------------------------------------------------------------------------------------------------------------------------------------------------------------------------------------------------------------------------------------------------------------------------------------------------------------------------------------------------------------------------------------------------------------------------------------------------------------------------------------------------------------------------------------------------------------------------------------------------------------------------------------------------------------------------------------------------------------------------------------------------------------------------------------------------------------------------|
| Journal:                      | <i>BMJ Open</i>                                                                                                                                                                                                                                                                                                                                                                                                                                                                                                                                                                                                                                                                                                                                                                                                                                                                                                                                                                                                                                                                                                                                                                                                                                |
| Manuscript ID                 | bmjopen-2019-030476                                                                                                                                                                                                                                                                                                                                                                                                                                                                                                                                                                                                                                                                                                                                                                                                                                                                                                                                                                                                                                                                                                                                                                                                                            |
| Article Type:                 | Protocol                                                                                                                                                                                                                                                                                                                                                                                                                                                                                                                                                                                                                                                                                                                                                                                                                                                                                                                                                                                                                                                                                                                                                                                                                                       |
| Date Submitted by the Author: | 18-Mar-2019                                                                                                                                                                                                                                                                                                                                                                                                                                                                                                                                                                                                                                                                                                                                                                                                                                                                                                                                                                                                                                                                                                                                                                                                                                    |
| Complete List of Authors:     | Casey, Jonathan; Vanderbilt University Medical Center, Allergy, Pulmonary, and Critical Care<br>Vaughan, Erin; Vanderbilt University Medical Center<br>Lloyd, Bradley; Vanderbilt University Medical Center, Respiratory Therapy<br>Bilas, Peter; University of Florida, Anesthesia<br>Hall, Eric; Vanderbilt University Medical Center, Internal Medicine<br>Toporek, Alexandra ; Vanderbilt University Medical Center, Internal Medicine<br>Buell, Kevin; Vanderbilt University Medical Center, Internal Medicine<br>Brown, Ryan; Vanderbilt University Medical Center<br>Richardson, Roger; Vanderbilt University Medical Center, Respiratory Therapy<br>Rooks, Jeffery; Vanderbilt University Medical Center, Respiratory Therapy<br>Wang, Li; Vanderbilt University Medical Center, Biostatistics<br>Lindsell, Christopher; Vanderbilt University Medical Center, Biostatistics<br>Ely, E. Wesley; Vanderbilt University Medical Center, Center for Critical Illness, Brain dysfunction & Survivorship (CIBS)<br>Self, Wesley; Vanderbilt University Medical Center, Emergency Medicine<br>Bernard, GR; Vanderbilt University Medical Center<br>Rice, TW; Vanderbilt University,<br>Semler, Matthew; Vanderbilt University Medical Center |
| Keywords:                     | Adult intensive & critical care < ANAESTHETICS, Adult intensive & critical care < INTENSIVE & CRITICAL CARE, Respiratory physiology < THORACIC MEDICINE                                                                                                                                                                                                                                                                                                                                                                                                                                                                                                                                                                                                                                                                                                                                                                                                                                                                                                                                                                                                                                                                                        |
|                               |                                                                                                                                                                                                                                                                                                                                                                                                                                                                                                                                                                                                                                                                                                                                                                                                                                                                                                                                                                                                                                                                                                                                                                                                                                                |

SCHOLARONE™  
Manuscripts

1  
2  
3 **Protocolized Post-Extubation Respiratory Support to Prevent Reintubation:**  
4 **Protocol and Statistical Analysis Plan for a Clinical Trial**  
5  
6  
7

8 Jonathan D. Casey MD<sup>1</sup>, Erin M. Vaughn BA<sup>1</sup>, Bradley D. Lloyd RRT-ACCS<sup>2</sup>, Peter A.  
9 Bilas MD<sup>3</sup>, Eric J. Hall MD<sup>4</sup>, Alexandra H. Toporek MD<sup>4</sup>, Kevin G. Buell MBBS<sup>4</sup>, Ryan  
10 M. Brown<sup>1</sup> MD, Roger K. Richardson RRT-ACCS<sup>2</sup>, J. Craig Rooks RRT-ACCS<sup>2</sup>, Li  
11 Wang, MS<sup>5</sup>, Christopher J. Lindsell PhD<sup>5</sup>, E. Wesley Ely MD, MPH<sup>1</sup>, Wesley H. Self  
12 MD, MPH<sup>6</sup>, Gordon R. Bernard MD<sup>1</sup>, Todd W. Rice, MD, MSc<sup>1</sup>, Matthew W. Semler,  
13 MD, MSc<sup>1</sup> for the Pragmatic Critical Care Research Group.  
14  
15  
16  
17  
18

19  
20 Affiliations: 1: Division of Allergy, Pulmonary, and Critical Care Medicine, Vanderbilt  
21 University Medical Center, Nashville, TN; 2: Division of Respiratory Care, Vanderbilt  
22 University Medical Center; 3: Department of Anesthesiology, University of Florida; 4:  
23 Department of Medicine, Vanderbilt University Medical Center; 5: Department of  
24 Biostatistics, Vanderbilt University Medical Center; 6: Department of Emergency  
25 Medicine, Vanderbilt University Medical Center  
26  
27  
28  
29  
30

31  
32 Corresponding author:  
33

34 Jonathan D. Casey, MD  
35

36 T-1218 MCN, 1161 21st Ave S., Nashville, TN 37232-2650  
37

38 Fax: (615) 343-7448  
39

40 Corresponding Author's Email Address: [Jonathan.d.Casey@vanderbilt.edu](mailto:Jonathan.d.Casey@vanderbilt.edu)  
41  
42

43 Authors contributions: Study concept and design: J.D.C., T.W.R., M.W.S.; Acquisition of  
44 data: J.D.C., E.M.V., B.D.L., P.A.B., E.J.H., A.H.T., K.G.B., R.M.B., R.K.R., J.C.R.  
45 M.W.S.; Analysis and interpretation of data: J.D.C, and M.W.S.; Drafting of the  
46 manuscript: J.D.C, M.W.S.; Critical revision of the manuscript for important intellectual  
47 content: J.D.C, M.W.S.; Statistical analysis: J.D.C., L.W., C.J.L., and M.W.S.; Study  
48 supervision: T.W.R.  
49  
50  
51  
52  
53

54  
55 Sources of Funding:  
56  
57

1  
2  
3 This study was supported in part by the Vanderbilt CTSA grant UL1TR002243 from  
4 NCATS/NIH. Jonathan D. Casey was supported in part by the NIH (2T32HL087738-  
5 12). Matthew W. Semler was supported in part by the NHLBI (K12HL133117 and  
6 K23HL143053). Todd W. Rice was supported in part by the NIH (R34HL105869). Data  
7 collection used the Research Electronic Data Capture (REDCap) tool developed and  
8 maintained with Vanderbilt Institute for Clinical and Translational Research grant  
9 support (UL1 TR000445 from NCATS/NIH).  
10  
11  
12  
13  
14  
15  
16

17 The funding institutions had no role in (1) conception, design, or conduct of the study,  
18 (2) collection, management, analysis, interpretation, or presentation of the data, or (3)  
19 preparation, review, or approval of the manuscript.  
20  
21  
22  
23

24 Conflicts of Interest: All authors completed and submitted the ICMJE Form for  
25 Disclosure of Potential Conflicts of Interest. The authors declared no potential conflicts  
26 of interest with the current work. Todd W. Rice reported serving as a consultant for  
27 Avisa Pharma, LLC, and as the Director of Medical Affairs for Cumberland  
28 Pharmaceuticals, Inc.  
29  
30  
31  
32  
33

34 Key words for indexing: Mechanical ventilation, Reintubation, Post-extubation, High flow  
35 nasal cannula, Non-invasive ventilation  
36  
37  
38

39 Subject Descriptor Number: 4.4 Clinical Trials in Critical Care Medicine  
40  
41  
42

43 Manuscript Word Count (body only): 6,096

44 Abstract Word Count: 293  
45  
46  
47

48 Submission Date: 3/13/19

49 Version: 1.0  
50  
51  
52

53 Supplemental digital content is available for this article.  
54  
55  
56  
57  
58  
59  
60

**ABSTRACT:**

**Introduction:** Following extubation from invasive mechanical ventilation, nearly 1 in 7 critically ill adults requires reintubation. Reintubation is independently associated with increased mortality. Post-extubation respiratory support (non-invasive ventilation or high flow nasal cannula applied at the time of extubation) has been reported in small-to-moderate sized trials to reduce reintubation rates among hypercapnic patients, high-risk patients without hypercapnia, and low-risk patients without hypercapnia. It is unknown whether protocolized provision of post-extubation respiratory support to every patient undergoing extubation would reduce the overall reintubation rate, compared to usual care.

**Methods and Analysis:** The Protocolized Post-Extubation Respiratory Support (PROPER) trial is a pragmatic, cluster-crossover trial being conducted between October 1, 2017 and March 31, 2019 in the medical intensive care unit of Vanderbilt University Medical Center. PROPER compares usual care versus protocolized post-extubation respiratory support (a respiratory therapist-driven protocol that advises the provision of non-invasive ventilation or high flow nasal cannula based on patient characteristics). For the duration of the trial, the unit is divided into two clusters. One cluster receives protocolized support and the other receives usual care. Each cluster crosses over between treatment group assignments every three months. All adults undergoing extubation from invasive mechanical ventilation are enrolled except those who received less than 12 hours of mechanical ventilation, have “Do Not Intubate” orders, or have been previously reintubated during the hospitalization. The anticipated enrollment is approximately 630 patients. The primary outcome is reintubation within 96 hours of extubation.

1  
2  
3 **Ethics and dissemination:** The trial was approved by the Vanderbilt Institutional  
4  
5 Review Board. The results will be submitted for publication in a peer-reviewed journal  
6  
7 and presented at one or more scientific conferences. The trial was registered with  
8  
9 ClinicalTrials.gov (NCT03288311) on September 20, 2017, prior to the enrollment of the  
10  
11 first patient on October 1, 2017.  
12  
13  
14  
15  
16  
17  
18  
19  
20  
21  
22  
23  
24  
25  
26  
27  
28  
29  
30  
31  
32  
33  
34  
35  
36  
37  
38  
39  
40  
41  
42  
43  
44  
45  
46  
47  
48  
49  
50  
51  
52  
53  
54  
55  
56  
57  
58  
59  
60

For peer review only

## ARTICLE SUMMARY

### *Strengths and limitations of this study*

- This ongoing pragmatic trial will provide the first comparison of clinical outcomes between protocolized post-extubation respiratory support and usual care following extubation of critically ill adults
- The broad inclusion criteria will increase generalizability and the moderately large size will provide the opportunity to examine subgroups of interest
- The trial is being conducted at a single center
- The nature of the study intervention does not allow blinding

## INTRODUCTION

Up to 40% of patients admitted to an intensive care unit require invasive mechanical ventilation [1]. Protocols for low tidal volume ventilation, daily spontaneous awakening trials, and daily spontaneous breathing trials have considerably shortened the duration of invasive mechanical ventilation and improved outcomes for these patients [2,3].

Despite these improvements, the period of time following extubation remains high risk, with rates of reintubation between 10 and 15% in the first 96 hours after extubation [4–8]. Reintubation is associated with increased rates of nosocomial infection [9] and is independently associated with an increased risk of death [7,10,11]. Despite significant improvements in the management of patients receiving invasive mechanical ventilation, the rate of reintubation has not changed meaningfully over the last 20 years [12–14]. The only post-extubation therapy suggested to potentially reduce the rate of reintubation is respiratory support with either non-invasive ventilation (NIV) or high flow nasal cannula (HFNC).

For patients with respiratory failure from an acute exacerbation of chronic obstructive pulmonary disease (COPD) [15] and cardiogenic pulmonary edema [16], NIV can prevent the need for the initial intubation, improve the safety for those progressing to intubation [17], and decrease mortality. Among patients who experience respiratory failure after extubation, however, the data have been disappointing. “Rescue” NIV, applied when a patient develops respiratory failure hours or days after extubation, delays the time to reintubation and may be associated with an increase in ICU mortality [18,19]. Post-extubation respiratory support with NIV, started at the time of extubation



1  
2  
3 as prevention, not as treatment for recurrent respiratory failure after extubation, has had  
4  
5 more promising initial results.  
6

7  
8 In unselected ICU populations, several trials failed to demonstrate significant benefit  
9  
10 of post-extubation respiratory support with NIV [20,21], but success has been observed  
11  
12 in targeted sub-populations, specifically those presumed to be at high risk. These trials  
13  
14 have defined risk of re-intubation using various criteria, including duration of ventilation,  
15  
16 age greater than 65, Acute Physiology and Chronic Health Evaluation (APACHE) II  
17  
18 score exceeding 12 on the day of extubation, congestive heart failure, hypercapnia,  
19  
20 weak cough, upper airway stridor, and co-morbidities. For these high-risk patients, post-  
21  
22 extubation support with NIV may decrease the rate of reintubation [5,22]. For patients  
23  
24 who are hypercapnic during a spontaneous breathing trial, post-extubation support with  
25  
26 NIV appears to reduce reintubation and improve 90-day mortality [23]. Recent national  
27  
28 guidelines for management following extubation recommend post-extubation respiratory  
29  
30 support with NIV for patients at high risk of reintubation [3]. While “high-risk” was not  
31  
32 defined in these guidelines, it was suggested that the criteria may include hypercapnia,  
33  
34 COPD, congestive heart failure, or other serious comorbidities.  
35  
36  
37  
38  
39

40 HFNC, a device capable of providing 100% oxygen at flow rates that exceed peak  
41  
42 inspiratory flow rates, decreases work of breathing, provides a low level of continuous  
43  
44 positive airway pressure, washes out dead space, and improves patient comfort and  
45  
46 secretion management [24–28]. HFNC may decrease mortality in non-intubated  
47  
48 patients with hypoxemic respiratory failure [29]. In non-hypercapnic patients undergoing  
49  
50 extubation in a medical ICU, post-extubation respiratory support with HFNC, started at  
51  
52 the time of extubation and continued for 24 to 48 hours, has been reported to reduce  
53  
54  
55  
56  
57  
58  
59  
60

1  
2  
3 the rate of reintubation in high risk patients, low risk patients, and a general population  
4 of ICU patients [30–32].  
5

6  
7 In combination, these studies raise the hypothesis that all critically ill adults  
8 undergoing extubation from invasive mechanical ventilation might benefit from some  
9 form of post-extubation respiratory support, either NIV or HFNC. Concerns remain,  
10 however, that results of recent studies may not generalize to the broader population of  
11 patients extubated in intensive care units outside of the settings in which the studies  
12 were conducted. Rates of reintubation in reported trials range from 14.4% in “low risk”  
13 patients [31] to 19.1% for “high-risk” patients [32], considerably higher than the 10%  
14 reintubation rate cited by large national registries [8]. Use of any form of post-  
15 extubation respiratory support during routine clinical practice remains uncommon at  
16 many centers.  
17  
18  
19  
20  
21  
22  
23  
24  
25  
26  
27  
28  
29

30  
31 Given the potential benefits for post-extubation respiratory support for multiple  
32 patient populations, the low uptake in current usual care in many settings, and concerns  
33 about generalizability from prior explanatory trials, an effectiveness trial among critically  
34 ill adults undergoing extubation from mechanical ventilation is warranted. We designed  
35 the Protocolized Post-Extubation Respiratory Support (PROPER) Trial to determine the  
36 overall effect of a protocolized approach to post-extubation support (protocolized  
37 support) on reintubation among a broad population of critically ill adults receiving  
38 invasive mechanical ventilation.  
39  
40  
41  
42  
43  
44  
45  
46  
47  
48  
49  
50

## 51 **METHODS AND ANALYSIS**

52  
53  
54  
55  
56  
57  
58  
59  
60

1  
2  
3 This manuscript was prepared in accordance with Standard Protocol Items:  
4  
5 Recommendations for Interventional Trials (SPIRIT) guidelines (Fig. 1; SPIRIT checklist  
6  
7 in online supplement, section 1). [33]  
8  
9  
10  
11

### 12 *Study Design*

13  
14 The Protocolized Post-Extubation Respiratory Support (PROPER) Trial is a  
15  
16 prospective, unblinded, pragmatic, cluster-crossover trial being conducted between  
17  
18 October 1, 2017 and March 31, 2019 in the medical intensive care unit of Vanderbilt  
19  
20 University Medical Center in Nashville, TN, USA. PROPER compares the rate of  
21  
22 reintubation within 96 hours of extubation between patients provided protocolized  
23  
24 support (a respiratory therapist-driven protocol that advises the provision of non-  
25  
26 invasive ventilation or high flow nasal cannula based on patient characteristics), to usual  
27  
28 care (where post-extubation management is at the discretion of treating clinicians).  
29  
30 Consistent with the concept of a pragmatic clinical trial [34], the eligibility criteria are  
31  
32 broad and the study procedures are embedded into routine care and executed by  
33  
34 clinical personnel. The goal is to evaluate the effectiveness of protocolized support  
35  
36 when applied to “real-world” practice. The trial was approved by the Vanderbilt  
37  
38 University Medical Center Institutional Review Board (IRB) with waiver of informed  
39  
40 consent (IRB 170650). The trial is investigator-initiated with funding provided by the  
41  
42 Vanderbilt Institute for Clinical and Translational Research through a Clinical and  
43  
44 Translational Science Award from the National Center for Advancing Translational  
45  
46 Sciences (UL1 TR000445). The trial protocol was registered with ClinicalTrials.gov  
47  
48 prior to initiation of patient enrollment (ClinicalTrials.gov identifier: NCT03288311).  
49  
50  
51  
52  
53  
54  
55  
56  
57  
58  
59  
60

### *Patient and Public Involvement*

Patients and the public were not involved in identifying the research question or the design of the study. The results of the study will be disseminated to the public at the completion of the trial.

### *Study Site and Population*

The trial is being conducted in the 35-bed medical intensive care unit at Vanderbilt University Medical Center.

The inclusion criteria are:

1. Patient is located in a participating unit
2. Patient undergoing extubation from mechanical ventilation
3. Patient has been receiving mechanical ventilation for at least 12 hours
4. Age  $\geq$  18 years old

The exclusion criteria for the trial are:

1. Patient is receiving ventilation via a tracheostomy
2. Patient is being extubated to comfort measures or has "Do Not Reintubate" order in place at the time of extubation
3. Patient has required reintubation after a prior attempt at extubation during this hospitalization
4. Unplanned or self-extubation, where immediate reintubation is deemed necessary by the clinical team

1  
2  
3 The time of enrollment is considered to be the time of extubation. A patient flow  
4 diagram describing the number of patients screened for the trial (all patients who  
5 received invasive mechanical ventilation in the study unit), the number who did not meet  
6 inclusion criteria (e.g. died before extubation), and the number who were excluded, will  
7 be provided in the manuscript reporting the results of the trial (template of flow diagram  
8 is provided as supplementary Figure S1).  
9  
10  
11  
12  
13  
14  
15  
16  
17  
18

### 19 *Randomization and Treatment Allocation*

20  
21 The medical intensive care unit is divided into two geographic clusters (the front  
22 hallway and the back hallway), each of which is staffed by a respiratory therapist.  
23  
24 During each three-month block of the study, patients in one cluster receive protocolized  
25 support delivered by one respiratory therapist while patients in the other cluster receive  
26 usual care delivered by another respiratory therapist. The assigned treatment group  
27 alternates every three months over the course of the trial so that each cluster will  
28 experience an equal number of months of protocolized support and usual care (Fig. 2).  
29  
30 A single randomization was performed to determine which cluster would receive  
31 protocolized support during the first block.  
32  
33  
34  
35  
36  
37  
38  
39  
40  
41

42 The rationale for dividing the study unit into two clusters by geographic location  
43 of the beds was so that all patients assigned to a given respiratory therapist's cluster will  
44 receive the same treatment. A respiratory therapist caring for patients in the cluster  
45 assigned to protocolized support receives education on post-extubation respiratory  
46 support and structured feedback on his or her performance at the practice level.  
47  
48 Assigning some patients cared for by a respiratory therapist protocolized support and  
49  
50  
51  
52  
53  
54  
55  
56  
57  
58  
59  
60

1  
2  
3 some patients to usual care was expected to introduce contamination because the  
4  
5 respiratory therapist would be more likely to deliver post-extubation respiratory support  
6  
7 to patients in their care assigned to the usual care arm. Given the nature of the  
8  
9 intervention, patients, treating clinicians, and investigators are not blinded to group  
10  
11 assignment.  
12  
13  
14  
15

### 16 17 *Study Interventions*

#### 18 19 **Protocolized Support**

20  
21 Patients in the protocolized support group are assigned to receive post-  
22  
23 extubation respiratory support starting at the time of extubation. The choice between  
24  
25 non-invasive ventilation and high-flow nasal cannula is made using a standardized  
26  
27 protocol for post-extubation respiratory support and is implemented by the patient's  
28  
29 respiratory therapist (Fig. 3).  
30  
31  
32

33 Based on the results of previous trials, the protocol for post-extubation  
34  
35 respiratory support recommends NIV immediately upon extubation via a full facemask  
36  
37 for all patients in the protocolized support group who have suspected hypercapnia  
38  
39 [22,23] or are intubated for an acute exacerbation of COPD [35]. Because arterial blood  
40  
41 gases are not routinely performed during spontaneous breathing trials in the study unit,  
42  
43 suspected hypercapnia is defined as known chronic hypercapnic respiratory failure,  
44  
45 known obesity hypoventilation syndrome, or an arterial blood gas with a partial pressure  
46  
47 of arterial carbon dioxide (PaCO<sub>2</sub>) >45 mmHg on a spontaneous breathing trial.  
48  
49 Recommended initial settings for NIV include initiation with an initial inspiratory positive  
50  
51 airway pressure of 14 cmH<sub>2</sub>O, an expiratory positive airway pressure of 8 cmH<sub>2</sub>O, and a  
52  
53  
54  
55  
56  
57  
58  
59  
60

1  
2  
3 backup respiratory rate of 12 breaths per minute. Settings are titrated to maintain a  
4  
5 minute ventilation between 5.0 and 10.0 liters per minute and a respiratory rate below  
6  
7 30 breaths per minute, with a maximum inspiratory positive airway pressure of 20  
8  
9 cmH<sub>2</sub>O. Inspired fraction of oxygen is titrated to maintain an oxygen saturation > 90%  
10  
11 (Fig. S2). Removal of NIV for up to one hour at a time for patient comfort and to allow  
12  
13 patients to eat or drink is encouraged and administration of sedatives to increase patient  
14  
15 tolerance of NIV is discouraged. Protocol recommendations may be altered at the  
16  
17 discretion of the respiratory therapist or the clinical team.  
18  
19  
20

21  
22 Given previous data suggesting that post-extubation support with HFNC may be  
23  
24 superior to conventional oxygen in low-risk patients [31] and equivalent to NIV in non-  
25  
26 hypercapnic high-risk patients [32], the protocol for post-extubation respiratory support  
27  
28 recommends HFNC for all patients in the protocolized support group who were not  
29  
30 intubated for an acute exacerbation of COPD and who do not have suspected  
31  
32 hypercapnia. Additionally, HFNC is recommended for patients who have a  
33  
34 contraindication to NIV (facial or cranial trauma or surgery, recent gastric or esophageal  
35  
36 surgery, inability to protect the airway, active emesis or upper gastrointestinal bleeding,  
37  
38 excessive amount of respiratory secretions, or lack of cooperation). Patients who are  
39  
40 extubated to NIV but are unable to tolerate it may be transitioned to HFNC.  
41  
42  
43

44  
45 For patients in the protocolized support group without suspected hypercapnia or  
46  
47 a COPD exacerbation, HFNC is initiated immediately upon extubation. Recommended  
48  
49 initial settings for HFNC and titration and weaning parameters include initial flow rates of  
50  
51 at least 40 liters per minute, adjustment of flow rates in increments of 5 liters per minute,  
52  
53 titration to patient comfort and a respiratory rate less than 30, a maximum flow rate of  
54  
55  
56  
57

1  
2  
3 60 liters per minute, and titration of the fraction of inspired oxygen to maintain an arterial  
4  
5 oxygen saturation > 90% (Fig. S3).  
6

7  
8 Post-extubation respiratory support is provided from the time of extubation until  
9  
10 5AM on the day following extubation. At 5AM on the day following extubation, a  
11  
12 respiratory therapist assesses for readiness for weaning from post-extubation  
13  
14 respiratory support. This timing was designed to allow patients to transfer out of the  
15  
16 ICU on the day following extubation if clinically appropriate. Based on timing of  
17  
18 extubation during the year preceding this trial, patients are expected to receive a  
19  
20 median of 17 hours of respiratory support, and no less than five hours of respiratory  
21  
22 support prior to being evaluated for weaning.  
23  
24  
25

26  
27 If the patient meets weaning criteria (Fig S2, S3) at the time of their assessment,  
28  
29 the device is removed and the patient may be initiated on conventional oxygen therapy  
30  
31 through a nasal cannula or face mask if needed. Post-extubation respiratory support  
32  
33 with NIV or HFNC may be continued at the discretion of the treating clinicians, in which  
34  
35 case subsequent titration and weaning is determined by the treating clinicians. Post-  
36  
37 extubation respiratory support may be discontinued prior to 5AM on the day following  
38  
39 extubation if the patient is transferred out of the ICU, the patient declines further post-  
40  
41 extubation respiratory support, or the treating clinicians determine that discontinuation is  
42  
43 needed for the optimal care of the patient.  
44  
45  
46

47  
48 The decision to use HFNC or NIV as rescue treatment for post-extubation  
49  
50 respiratory failure is made by treating clinicians and is prospectively recorded but is not  
51  
52 encouraged. For patients in the protocolized support group, treating clinicians may  
53  
54 decide to use invasive mechanical ventilation, NIV, HFNC, or conventional oxygen  
55  
56  
57  
58  
59  
60



1  
2  
3 therapy at any time, regardless of group assignment, if felt to be needed for the safe  
4  
5 care of the patient.  
6  
7  
8  
9

## 10 **Usual Care**

11  
12 All aspects of post-extubation management for patients in the usual care arm are  
13  
14 determined by treating clinicians. Treating clinicians may elect to use NIV or HFNC as  
15  
16 post-extubation respiratory support for those patients they believe will benefit from these  
17  
18 therapies. No guidance is provided by the study regarding patient selection, device  
19  
20 selection, titration or weaning parameters, or timing of removal of support. In the study  
21  
22 ICU in the year prior to the trial, 8.3% of patients received post-extubation respiratory  
23  
24 support during routine clinical care; 7.1% received NIV and 1.2% received HFNC.  
25  
26  
27

28 For patients in the usual care group, treating clinicians may decide to use  
29  
30 invasive mechanical ventilation, NIV, HFNC, or conventional oxygen therapy at any  
31  
32 time, regardless of group assignment, if felt to be needed for the optimal care of the  
33  
34 patient.  
35  
36  
37  
38  
39

## 40 **Co-interventions**

41  
42 Study group assignment determines only the approach to post-extubation  
43  
44 respiratory support. Treating clinicians determine all management prior to extubation,  
45  
46 including the approach to sedation, timing of spontaneous breathing and awakening  
47  
48 trials, and readiness for extubation. The study ICU has established clinical protocols for  
49  
50 the care of patients receiving invasive mechanical ventilation including:  
51  
52

- 53  
54 1. Critical Care Pain Observation Tool (CPOT score) [36]  
55  
56  
57

2. Daily spontaneous awakening trial (SAT) safety screen, SAT performance, spontaneous breathing trial (SBT) safety screen, and SBT performance [2]
3. Richmond Agitation and Sedation Scale (RASS score) [37,38]
4. Choice of analgesia and sedation
5. Confusion Assessment Method for the ICU (CAM-ICU) [39,40]
6. Early Mobility [41]

The clinical protocols used in the study unit can be found in the supplementary appendix.

Following extubation, all clinical care decisions, other than use of NIV and HFNC for post-extubation respiratory support until 5AM the day following extubation, are made by treating clinicians, including use of diuretics, intravenous fluids, antibiotics, corticosteroids, airway clearance measures, and breathing treatments.

## Training

The protocols for initiation, titration, and weaning of NIV and HFNC were developed by consensus with local respiratory therapy leaders using best-practice recommendations from professional societies [3], protocols from prior randomized trials, and local protocols regarding the provision of non-invasive respiratory support. In addition to these materials, all respiratory therapists received a 30-minute lecture on the delivery of post-extubation respiratory support prior to caring for patients assigned to the protocolized support group. Ongoing education on post-extubation respiratory support is provided by study staff throughout the trial.

## Data Collection

Data are prospectively collected from the electronic health record by trained study personnel. Data are stored in a secure, online database [42]. Collected data include:

Characteristics: Age; gender; height; weight; body mass index; race; chronic comorbidities; indication for intubation; APACHE II score at ICU admission

Baseline (i.e. time of extubation): APACHE II score; length of mechanical ventilation; last known left ventricular ejection fraction; active medical problems; failure of more than one spontaneous breathing trial; last known Glasgow Coma Score [43]; last known Richmond Agitation and Sedation Score [37]; last known CAM-ICU score [39]; highest FiO<sub>2</sub> delivered in the 6 hours prior to extubation; lowest oxygen saturation during a spontaneous breathing trial; highest respiratory rate in the 6 hours prior to extubation; highest respiratory rate during a spontaneous breathing trial; highest heart rate in the 6 hours prior to extubation; highest heart rate during a spontaneous breathing trial; use of vasopressors in the 6 hours prior to extubation; results of any arterial blood gas obtained during a spontaneous breathing trial.

Data from 0 to 96 hours: The need for reintubation within 96 hours; time to reintubation; indication for reintubation; presence of laryngeal edema requiring reintubation; amount of time spent receiving HFNC and NIV in the first 24 hours post-extubation; the amount of time spent receiving prophylactic post-extubation respiratory support from 0-96 hours post-extubation; the highest and lowest levels of respiratory support (flow rate; FiO<sub>2</sub>; IPAP; EPAP) at three time points

1  
2  
3 (0-6, 6-12, and 12-24 hours post-extubation); the highest and lowest respiratory  
4 rate, heart rate, SaO<sub>2</sub>; and FiO<sub>2</sub> at three timepoints (0-6, 6-12, and 12-24 hours  
5 post-extubation); the presence of delirium at any timepoint from 0-96 hours post-  
6 extubation (as determined by CAM-ICU score).  
7  
8  
9

10  
11  
12 Clinical Outcomes: Reintubation between baseline and the first of either hospital  
13 discharge or 28-days; in-hospital mortality; time to death; ICU-free days and  
14 ventilator-free days in the 28 days after enrollment.  
15  
16  
17  
18  
19

### 20 21 *Primary Outcome*

22 The primary outcome is reintubation in the 96 hours following enrollment.  
23  
24 Reintubation is defined as placement of an endotracheal tube or tracheostomy tube in  
25 the trachea for any reason.  
26  
27  
28  
29

30  
31 Death may be a competing event for the outcome of reintubation. Among the  
32 patients who would have met criteria for enrollment in the year prior to the trial, every  
33 patient who died within 96 hours of extubation experienced reintubation prior to death.  
34  
35 In the event that any patient in the trial dies in the 96 hours following enrollment without  
36 experiencing reintubation, they will be classified in the primary analysis as having met  
37 the primary outcome. Patients who are discharged from the hospital before 96 hours  
38 following enrollment without having experienced reintubation will be classified as not  
39 meeting the primary outcome.  
40  
41  
42  
43  
44  
45  
46  
47  
48

49 Any decision to reintubate will be made by the clinical team. Prior studies have  
50 attempted to protocolize the decision to reintubate [29,31,32]. Because the goal of the  
51 PROPER study is to evaluate the performance of protocolized support when applied to  
52  
53  
54  
55  
56  
57

1  
2  
3 a broad population of critically ill adults in “real-world” practice, we deliberately deferred  
4  
5 all decisions regarding management of post-extubation respiratory failure and  
6  
7 reintubation to the clinical team with no involvement or guidance from the research  
8  
9  
10 team.

### 11 12 13 14 *Secondary Outcome*

15  
16  
17 The single, pre-specified, secondary outcome is the number of ICU-free days in  
18  
19 the 28 days following enrollment. This is defined as the number of whole calendar days  
20  
21 alive and not admitted to an intensive care unit beginning at midnight on the day of  
22  
23 extubation to 28 days following enrollment. Patients who are never discharged from the  
24  
25 intensive care unit will receive a value of 0. Patients who die before day 28 will receive  
26  
27 a value of 0. For patients who return to an ICU and are subsequently discharged prior  
28  
29 to day 28, ICU-free days will be counted as the number of whole calendar days from  
30  
31 midnight on the day following the final ICU discharge to 28 days following enrollment.  
32  
33 All data collection will be censored at the first of hospital discharge or 28 days.  
34  
35  
36  
37  
38  
39

### 40 *Exploratory Outcomes*

- 41  
42  
43  
44  
45  
46  
47  
48  
49  
50  
51  
52  
53  
54  
55  
56  
57  
58  
59  
60
- All-cause in-hospital mortality
  - Ventilator-free days in the 28 days following enrollment (defined in the online supplement)
  - Time from enrollment to reintubation
  - Indication for reintubation (respiratory indication, laryngeal edema, other)
  - Delirium in the 96 hours following enrollment

- Lowest SpO<sub>2</sub>/FiO<sub>2</sub> ratio in the 24 hours following enrollment
- Highest respiratory rate in the 0-6 hours, 6-12 hours, and 12-24 hours following enrollment

## Statistical Analysis and Reporting

### *Sample Size Estimation*

Among patients in the study ICU in the year prior to the trial who would have met criteria for enrollment [44], the incidence of reintubation within 96 hours after extubation was 12.1%. Similar rates have been reported in previous observational studies of extubation in the ICU [6,7]. Prior randomized trials have reported that prophylactic post-extubation respiratory support with NIV may reduce the relative risk of reintubation by 49% to 66% in high risk patients [5,22], while post-extubation respiratory support with HFNC may reduce the relative risk of reintubation by 81% in high risk patients and 60% in low risk patients [30–32]. Based on the results of these prior randomized trials, we estimated that protocolized support would reduce the relative risk of reintubation by at least 55%. This is equivalent to an absolute risk reduction of 6.7%, from 12.1% in the usual care group to 5.4% in the protocolized support group.

Among patients in the study ICU in the year prior to the trial who would have met criteria for enrollment, the intra-cluster correlation, intra-period correlation, and intra-cluster intra-period correlation for the primary outcome were all <0.001 assuming a cluster-crossover design with two clusters and three-month periods. Using PS version 3.1.2 with the above assumptions and a chi-squared test of the primary hypothesis with an alpha level of 0.05, we calculated that enrolling 566 patients (283 per group) would

1  
2  
3 achieve at least 80% statistical power. Among patients in the study ICU in the year  
4 prior to the trial who would have met criteria for enrollment, 8.3% received post-  
5 extubation respiratory support during usual care. In order to account for loss of  
6 statistical power due to use of post-extubation respiratory support in the usual care  
7 group during the trial, we increased our sample size estimate by 10% to 623 patients.  
8  
9  
10  
11  
12  
13  
14  
15 Based on data from the study ICU in the year prior to the trial, we anticipated that  
16 enrollment of at least 630 patients would require a study duration of 18 months.  
17  
18  
19  
20

### 21 *Data and Safety Monitoring Board and Interim Analysis*

22  
23  
24 For this 18-month, single-center study comparing a minimal risk intervention with  
25 usual care, a data and safety monitoring board was not appointed and an interim  
26 analysis is not planned.  
27  
28  
29  
30

### 31 *Statistical Analysis Principles*

32  
33  
34  
35 All analyses will be conducted at the level of the individual patient during an  
36 individual hospitalization on an intent-to-treat fashion, unless otherwise specified.  
37  
38 Continuous variables will be reported as median and IQR; categorical variables will be  
39 reported as frequencies and proportions. Given the cluster cross-over design, all  
40 comparisons between the protocolized post-extubation respiratory support group and  
41 the usual care group will take into account the cluster and period level correlations. With  
42 only one primary outcome and one secondary outcome, a two-sided p-value of 0.05 will  
43 be considered statistically significant.  
44  
45  
46  
47  
48  
49  
50  
51  
52  
53  
54  
55  
56  
57  
58  
59  
60

### *Comparison of primary outcome between groups*

We will compare the binary primary outcome of reintubation within 96 hours between the protocolized support group and the usual care group. It is possible to estimate a marginal effect, which is interpreted as the population effect of implementing a general policy of post intubation ventilatory support, or a conditional effect, which is interpreted as the effect on an individual patient given the values of the covariates for that patient [45]. Since our intervention may be applied at both the unit level as a general policy, or at the patient level as an individual intervention, both may be of interest. We will use a generalized estimating equation (GEE) approach to estimate the marginal effect, and we will use a generalized linear mixed model with logit link function to estimate the conditional effect. Group assignment will be a fixed effect, and cluster and period will be included as random effects [46,47]. We will report both adjusted and unadjusted comparisons; for the purposes of declaring success on the primary endpoint, we will consider the unadjusted marginal effect.

Adjusted comparisons will include age, APACHE II score, duration of invasive mechanical ventilation, indication for intubation, chronic hypercapnia, chronic pulmonary disease, and respiratory rate on a spontaneous breathing trial. To account for non-linear relationships, continuous variables will be analyzed using restricted cubic splines with between 3 and 5 knots. Forest plots will be used to graphically display the adjusted analyses, and locally weighted regression or partial effects plots will be used to portray the association between continuous covariates and the outcome.

### *Comparison of secondary outcome between groups*



1  
2  
3 The secondary outcome is the number of ICU-free days in the 28 days following  
4 enrollment. We will use a proportional odds model to compare this outcome between  
5 groups. As with analysis of the primary outcome, a generalized estimating equation  
6 approach will be used to estimate marginal effects and generalized linear model  
7 approach will be used to estimate conditional effects, and both unadjusted and adjusted  
8 comparisons will be reported. Adjustment will include age, APACHE II score, duration of  
9 invasive mechanical ventilation, indication for intubation, chronic hypercapnia, chronic  
10 pulmonary disease, and respiratory rate on a spontaneous breathing trial.  
11  
12  
13  
14  
15  
16  
17  
18  
19  
20  
21  
22  
23

### 24 *Sensitivity analyses*

25  
26 To assess the impact of design considerations on the outcomes, we will conduct  
27 several sensitivity analyses. First, we assumed all patients who died within 96 hours to  
28 have required reintubation. We will repeat the analysis of the primary and secondary  
29 outcome classifying patients who died within 96 hours without experiencing reintubation  
30 as not meeting the primary outcome. Second, we have included all patients who are  
31 extubated, regardless of reason. We will repeat the analysis of the primary and  
32 secondary outcome excluding patients with an unexpected extubation, such as self-  
33 extubation. Finally, it is possible that some patients received less than 5 hours of post-  
34 extubation respiratory support due to, for example, a protocol error or patient  
35 intolerance. We will conduct a modified intent to treat analysis of the primary and  
36 secondary outcomes that excludes these patients.  
37  
38  
39  
40  
41  
42  
43  
44  
45  
46  
47  
48  
49  
50  
51  
52  
53

### 54 *Exploratory Analyses*

1  
2  
3       **Time to reintubation.** In our design, we selected a 96-hour window as being  
4  
5 appropriate for capturing re-intubation that might reasonably be associated with the  
6  
7 post-extubation respiratory support. Different rates may have been observed if different  
8  
9 time windows had been used. To evaluate the relative risk of reintubation over time, we  
10  
11 will construct a proportional hazards model. This will also allow us to account for the  
12  
13 competing risk of death.  
14  
15

16  
17  
18       **Effect Modification (Subgroup Analyses).** We will test for effect modification  
19  
20 on the primary outcome by evaluating the interaction between group assignment and  
21  
22 pre-specified subgroups. Any interaction term with a p-value less than 0.1 will putatively  
23  
24 identify an effect modifier. Subgroup analyses may proceed within levels of a modifying  
25  
26 variable. Pre-specified subgroups include:  
27  
28

- 29  
30       1.     Number of risk factors for reintubation, as defined by Hernandez et  
31  
32             al. [32]:  
33  
34
  - 35                 • Age > 65 years
  - 36                 • Heart failure as the primary indication for mechanical
  - 37                 ventilation
  - 38                 • Moderate to severe COPD
  - 39                 • APACHE II score at extubation > 12
  - 40                 • Body mass index > 30 kg/m<sup>2</sup>
  - 41                 • Failure of one or more spontaneous breathing trials
  - 42                 • Duration of invasive mechanical ventilation greater than 7
  - 43                 days
  - 44                 •
  - 45                 •
  - 46                 •
  - 47                 •
  - 48                 •
  - 49                 •
  - 50                 •
  - 51                 •
  - 52                 •
  - 53                 •
  - 54                 •
  - 55                 •
  - 56                 •
  - 57                 •
  - 58                 •
  - 59                 •
  - 60                 •

- 1
  - 2
  - 3
  - 4
  - 5
  - 6
  - 7
  - 8
  - 9
  - 10
  - 11
  - 12
  - 13
  - 14
  - 15
  - 16
  - 17
  - 18
  - 19
  - 20
  - 21
  - 22
  - 23
  - 24
  - 25
  - 26
  - 27
  - 28
  - 29
  - 30
  - 31
  - 32
  - 33
  - 34
  - 35
  - 36
  - 37
  - 38
  - 39
  - 40
  - 41
  - 42
  - 43
  - 44
  - 45
  - 46
  - 47
  - 48
  - 49
  - 50
  - 51
  - 52
  - 53
  - 54
  - 55
  - 56
  - 57
  - 58
  - 59
  - 60
2. Chronic hypercapnia or mechanical ventilation for COPD exacerbation
  3. Time of extubation (the effect of “dose” of therapy received will be evaluated using this baseline variable anticipated to correlate with the duration of post-extubation support, as patients are evaluated for removal from protocolized support at 5AM on the day following extubation)
  4. Primary indication for mechanical ventilation:
    - Hypoxemic respiratory failure
    - Hypercapnic respiratory failure
    - Altered mental status
    - To facilitate a procedure
    - Other
  5. Duration of invasive mechanical ventilation prior to enrollment
  6. Chronic pulmonary disease, defined as any of:
    - COPD, interstitial lung disease, asthma, cystic fibrosis, non-cystic fibrosis bronchiectasis, recurrent aspiration, pulmonary sarcoidosis, obstructive sleep apnea, obesity hypoventilation syndrome, pulmonary malignancy, pulmonary hypertension, chronic respiratory infection, or restrictive lung disease due to neuromuscular weakness
  7. APACHE II score at extubation

- 1
- 2
- 3 8. Respiratory rate during a spontaneous breathing trial prior to
- 4
- 5 extubation
- 6
- 7
- 8 9. Failure of more than one spontaneous breathing trial
- 9
- 10 10. Body mass index
- 11
- 12
- 13
- 14

### 15 *Corrections for multiple testing*

16 We have pre-specified a single primary outcome and a single secondary  
17 outcome. Consistent with recommendations of the Food and Drug Administration [48]  
18 and the European Medicines Association [49], each will be tested using a two-sided p-  
19 value with a significance level of 0.05. For all other analyses, emphasis will be placed  
20 on the estimate of effect size with 95% confidence intervals, as recommended by the  
21 *International Committee of Medical Journal Editors* [50], and no corrections for multiple  
22 comparisons will be performed.  
23  
24  
25  
26  
27  
28  
29  
30  
31  
32  
33  
34

### 35 *Handling of missing data*

36 The primary outcome, reintubation within 96 hours, is not anticipated to be  
37 missing for any patients. If ventilator status throughout the 96 hours is unavailable,  
38 which may occur if the patient is discharged home or transferred to a skilled nursing  
39 facility, we will use last known status carried forward. Missing data will not be imputed  
40 for the primary outcome, or any of the analyses of secondary or exploratory outcomes.  
41  
42 In adjusted analyses, missing data for covariates will be imputed using multiple  
43 imputations. We expect that age, APACHE II score, duration of invasive mechanical  
44 ventilation, indication for intubation, chronic hypercapnia, and chronic pulmonary  
45  
46  
47  
48  
49  
50  
51  
52  
53  
54  
55  
56  
57  
58  
59  
60

1  
2  
3 disease will not be missing in any patients. Respiratory rate during the spontaneous  
4  
5 breathing trial may not be available in all patients, particularly those who undergo  
6  
7 unexpected extubations.  
8  
9

### 10 11 12 *Trial Status*

13  
14 PROPER is an ongoing pragmatic trial comparing protocolized respiratory  
15  
16 support to usual care following the extubation of critically ill adults. Patient enrollment  
17  
18 began on October 1, 2017 and will complete on March 31, 2019.  
19  
20  
21  
22  
23

### 24 **Ethics and dissemination**

#### 25 26 *IRB Approval*

27  
28 The trial was approved by the Institutional Review Board (IRB) of Vanderbilt  
29  
30 University Medical Center with a waiver of informed consent (IRB# 170650).  
31  
32  
33  
34

#### 35 36 *Consent*

37  
38 There are no known randomized trials or evidence-based guidelines that  
39  
40 advocate for or against the use of protocolized support for all critically ill adults  
41  
42 undergoing extubation in a medical intensive care unit. This study was submitted to the  
43  
44 IRB as meeting the criteria for minimal risk because:  
45

- 46  
47 (1) Respiratory support was used *ad hoc* in the clinical care of patients undergoing  
48  
49 extubation in the participating ICU prior to initiating the research.  
50
- 51  
52 (2) There are no data asserting the superiority or inferiority of protocolized  
53  
54 respiratory support for all patients compared with usual care.  
55  
56  
57

- 1  
2  
3 (3) If needed for the optimal care of a patient, treating clinicians can administer  
4 NIV, HFNC, or conventional oxygen therapy to any patient, at any time,  
5  
6 regardless of group assignment.  
7  
8  
9  
10 (4) All other activities of the research are limited to collection of data from the  
11  
12 medical record with no other participant interaction.  
13

14 In addition to the criteria for minimal risk, the conduct of the study was thought to  
15 be impracticable without an alteration or waiver of informed consent. Obtaining  
16  
17 prospective, informed consent from all patients being extubated by each respiratory  
18  
19 therapist in each cluster would not be feasible, and would risk systematically excluding  
20  
21 patients experiencing urgent or unplanned extubation. Excluding such patients would  
22  
23 introduce bias and limit generalizability by neglecting a group at high risk of reintubation.  
24  
25  
26  
27  
28  
29

### 30 *Publication*

31  
32  
33 The results of the trial will be submitted for publication in a peer-reviewed journal  
34  
35 and presented at one or more scientific conferences.  
36  
37  
38

## 39 **DISCUSSION**

40  
41  
42 Upon completion, PROPER will provide the most comprehensive data to date on  
43  
44 the effect of protocolized post-extubation respiratory support on reintubation in an  
45  
46 unselected medical ICU population. Previous trials have suggested that patients with  
47  
48 hypercapnia [22,23], non-hypercapnic patients at high risk of reintubation [3,5,22], and  
49  
50 non-hypercapnic patients at low risk of reintubation [31] could all potentially benefit from  
51  
52 post-extubation respiratory support. The protocolized provision of respiratory support to  
53  
54  
55  
56  
57  
58  
59  
60

1  
2  
3 a broad population of ICU patients encompassing each of these previously-examined  
4 subgroups in a randomized, controlled trial has yet to be reported.  
5  
6

7  
8 If our results demonstrate that protocolized respiratory support reduces the rate of  
9 reintubation, this would provide compelling evidence that nearly all patients undergoing  
10 extubation in a medical intensive care unit should receive respiratory support in the form  
11 of either NIV or HFNC at the time of extubation. Conversely, if we demonstrate that  
12 protocolized respiratory support does not reduce the rate of reintubation overall, this  
13 would allow providers to avoid unnecessarily expending the resources required to  
14 provide post-extubation respiratory support to nearly all patients undergoing extubation.  
15 Instead, resources might be targeted to those patient subgroups for whom benefit has  
16 been previously noted, or for whom benefit is noted in our subgroup analyses. The  
17 results may also guide future research toward identifying patients at highest risk of  
18 reintubation and those most likely to benefit from respiratory support.  
19  
20  
21  
22  
23  
24  
25  
26  
27  
28  
29  
30  
31  
32

33 Previous trials have provided 24 to 48 hours of support [5,22,23,31,32]. We  
34 elected a lower minimum duration because this support can only be provided in an ICU  
35 setting at many centers, and in a population with a low baseline reintubation rate the  
36 intervention could potentially lead to longer ICU lengths of stay than necessary. The  
37 design of the PROPER trial specifies the provision of post-extubation respiratory  
38 support from extubation until at least 5AM the following day, at which point the patient's  
39 readiness to wean from post-extubation respiratory support is assessed. This strategy  
40 involves a minimum of 5 hours of respiratory support, and our preliminary data suggest  
41 a median of 17 hours of support. While shorter than other studies, our approach allows  
42  
43  
44  
45  
46  
47  
48  
49  
50  
51  
52  
53  
54  
55  
56  
57  
58  
59  
60

1  
2  
3 removal of support and transfer from the ICU on the day following extubation, if clinically  
4 appropriate, or continuation of respiratory support when clinically indicated.  
5  
6

7  
8 The primary outcome is reintubation, defined as placement of an endotracheal  
9 tube or tracheostomy tube in the trachea for any reason, in the 96 hours following  
10 enrollment. Previous studies have evaluated reintubation over a broad range of time  
11 intervals, from 48 hours [31,32,51] to 7 days [52] and longer [5]. Longer time intervals  
12 capture more events but increase the risk that the reintubation is unrelated to the  
13 original illness and respiratory function in the immediate post-extubation period.  
14  
15 Intubation within 96 hours of extubation was chosen as the primary outcome based on a  
16 large observational study assessing time to reintubation in 96,367 adults who received  
17 ventilation in an intensive care unit in the United States. That study proposed 96 hours  
18 as the optimal time point at which to assess reintubation [8]. While justifiable, selection  
19 of a binary endpoint occurring within a defined time window might miss evidence for  
20 benefit, and so we have prespecified a survival analysis that considers time to  
21 reintubation.  
22  
23  
24  
25  
26  
27  
28  
29  
30  
31  
32  
33  
34  
35  
36

37  
38 In our design, we have made choices to bias towards the null. This means there  
39 are several threats to observing a difference between study groups. Foremost, the  
40 anticipated median duration of post-extubation respiratory support of 17 hours is shorter  
41 than the 24-48 hours delivered in some prior trials. Some patients may be intolerant of  
42 post-extubation respiratory support, which may further limit the average exposure to the  
43 study interventions. It is also possible that the use of post-extubation respiratory  
44 support in the usual care group may be higher during the study period than prior to the  
45 trial due to increasing provider familiarity with post-extubation respiratory support,  
46  
47  
48  
49  
50  
51  
52  
53  
54  
55  
56  
57  
58  
59  
60



1  
2  
3 contamination from the unblinded intervention being delivered in the same study  
4 location, or both. Another potential possibility is that use of one therapy will be similar  
5 between the intervention and usual care groups (e.g., use of NIV) with substantial  
6 separation between groups in the other therapy (e.g., use of HFNC). This would require  
7 a more nuanced interpretation of the study findings. Treating clinicians are aware of  
8 study group assignment and so clinicians may alter the timing of extubation or  
9 management of post-extubation respiratory failure based on group assignment. To  
10 assess for such bias, we will present baseline characteristics of the two study groups,  
11 as well as information about use of rescue respiratory support in the two groups, and we  
12 will adjust for these factors or conduct prespecified sensitivity analyses. Finally, group  
13 assignment at the level of the cluster with multiple cluster-level crossovers introduces  
14 the possibility for intracluster correlation, intraperiod correlation, and intracluster  
15 intraperiod correlation, which may confound the relationship between group assignment  
16 and outcome. In the PROPER trial, the two clusters are anticipated to be extremely  
17 similar, as they are two halves of a single ICU. The periods are relatively short and  
18 each cluster alternates between group assignment relatively frequently. Among  
19 patients in the study ICU in the year prior to the trial who would have met criteria for  
20 enrollment, we measured these correlations and found the effect of intracluster  
21 correlation, intraperiod correlation, and intracluster intraperiod correlation to be  
22 negligible (see Supplemental methods).  
23  
24  
25  
26  
27  
28  
29  
30  
31  
32  
33  
34  
35  
36  
37  
38  
39  
40  
41  
42  
43  
44  
45  
46  
47  
48  
49  
50

## 51 **CONCLUSION**

52  
53  
54  
55  
56  
57

1  
2  
3 We describe, before the conclusion of enrollment or data un-blinding, our trial  
4 design and our approach to analyzing the data from a large, pragmatic, cluster-  
5 crossover trial comparing the rate of reintubation between patients receiving  
6 protocolized post-extubation respiratory support and those patients receiving usual  
7 care. Disseminating this pre-specified framework enhances the rigor and reproducibility  
8 of our final report, and will allow readers to better judge the impact of our findings.  
9  
10  
11  
12  
13  
14  
15  
16  
17  
18  
19  
20  
21  
22  
23  
24  
25  
26  
27  
28  
29  
30  
31  
32  
33  
34  
35  
36  
37  
38  
39  
40  
41  
42  
43  
44  
45  
46  
47  
48  
49  
50  
51  
52  
53  
54  
55  
56  
57  
58  
59  
60

For peer review only

## REFERENCES

- 1 Wunsch H, Wagner J, Herlim M, *et al.* ICU occupancy and mechanical ventilator use in the United States. *Crit Care Med* 2013;**41**:2712–9. doi:10.1097/CCM.0b013e318298a139
- 2 Girard TD, Kress JP, Fuchs BD, *et al.* Efficacy and safety of a paired sedation and ventilator weaning protocol for mechanically ventilated patients in intensive care (Awakening and Breathing Controlled trial): a randomised controlled trial. *Lancet Lond Engl* 2008;**371**:126–34. doi:10.1016/S0140-6736(08)60105-1
- 3 Ouellette DR, Patel S, Girard TD, *et al.* Liberation from Mechanical Ventilation: An Official American College of Chest Physicians/American Thoracic Society Clinical Practice Guideline: Inspiratory Pressure Augmentation during Spontaneous Breathing Trials, Protocols Minimizing Sedation, and Non-invasive Ventilation Immediately After Extubation. *Chest* Published Online First: 3 November 2016. doi:10.1016/j.chest.2016.10.036
- 4 Thille AW, Boissier F, Ben-Ghezala H, *et al.* Easily identified at-risk patients for extubation failure may benefit from noninvasive ventilation: a prospective before-after study. *Crit Care Lond Engl* 2016;**20**:48. doi:10.1186/s13054-016-1228-2
- 5 Nava S, Gregoretti C, Fanfulla F, *et al.* Noninvasive ventilation to prevent respiratory failure after extubation in high-risk patients. *Crit Care Med* 2005;**33**:2465–70.
- 6 Thille AW, Richard J-CM, Brochard L. The Decision to Extubate in the Intensive Care Unit. *Am J Respir Crit Care Med* 2013;**187**:1294–302. doi:10.1164/rccm.201208-1523CI
- 7 Thille AW, Harrois A, Schortgen F, *et al.* Outcomes of extubation failure in medical intensive care unit patients. *Crit Care Med* 2011;**39**:2612–8. doi:10.1097/CCM.0b013e3182282a5a
- 8 Miltiades AN, Gershengorn HB, Hua M, *et al.* Cumulative Probability and Time to Reintubation in United States Intensive Care Units. *Crit Care Med* 2017;**45**:835–42. doi:10.1097/CCM.0000000000002327
- 9 Torres A, Gatell JM, Aznar E, *et al.* Re-intubation increases the risk of nosocomial pneumonia in patients needing mechanical ventilation. *Am J Respir Crit Care Med* 1995;**152**:137–41. doi:10.1164/ajrccm.152.1.7599812
- 10 Frutos-Vivar F, Esteban A, Apezteguia C, *et al.* Outcome of reintubated patients after scheduled extubation. *J Crit Care* 2011;**26**:502–9. doi:10.1016/j.jcrc.2010.12.015
- 11 Sellares J, Ferrer M, Cano E, *et al.* Predictors of prolonged weaning and survival during ventilator weaning in a respiratory ICU. *Intensive Care Med* 2011;**37**:775–84. doi:10.1007/s00134-011-2179-3
- 12 Esteban A, Anzueto A, Frutos F, *et al.* Characteristics and Outcomes in Adult Patients Receiving Mechanical Ventilation: A 28-Day International Study. *JAMA* 2002;**287**:345–55. doi:10.1001/jama.287.3.345
- 13 Esteban A, Ferguson ND, Meade MO, *et al.* Evolution of Mechanical Ventilation in Response to Clinical Research. *Am J Respir Crit Care Med* 2008;**177**:170–7. doi:10.1164/rccm.200706-893OC

- 1  
2  
3 14 Esteban A, Frutos-Vivar F, Muriel A, *et al.* Evolution of Mortality over Time in Patients Receiving  
4 Mechanical Ventilation. *Am J Respir Crit Care Med* 2013;**188**:220–30. doi:10.1164/rccm.201212-  
5 2169OC  
6  
7 15 Brochard L, Mancebo J, Wysocki M, *et al.* Noninvasive ventilation for acute exacerbations of chronic  
8 obstructive pulmonary disease. *N Engl J Med* 1995;**333**:817–22.  
9 doi:10.1056/NEJM199509283331301  
10  
11 16 Masip J, Roque M, Sánchez B, *et al.* Noninvasive ventilation in acute cardiogenic pulmonary edema:  
12 systematic review and meta-analysis. *JAMA* 2005;**294**:3124–30. doi:10.1001/jama.294.24.3124  
13  
14 17 Baillard C, Fosse J-P, Sebbane M, *et al.* Noninvasive Ventilation Improves Preoxygenation before  
15 Intubation of Hypoxic Patients. *Am J Respir Crit Care Med* 2006;**174**:171–7.  
16 doi:10.1164/rccm.200509-1507OC  
17  
18 18 Esteban A, Frutos-Vivar F, Ferguson ND, *et al.* Noninvasive Positive-Pressure Ventilation for  
19 Respiratory Failure after Extubation. *N Engl J Med* 2004;**350**:2452–60. doi:10.1056/NEJMoa032736  
20  
21 19 Keenan SP, Powers C, McCormack DG, *et al.* Noninvasive Positive-Pressure Ventilation for  
22 Postextubation Respiratory Distress: A Randomized Controlled Trial. *JAMA* 2002;**287**:3238–44.  
23 doi:10.1001/jama.287.24.3238  
24  
25 20 Su C-L, Chiang L-L, Yang S-H, *et al.* Preventive use of noninvasive ventilation after extubation: a  
26 prospective, multicenter randomized controlled trial. *Respir Care* 2012;**57**:204–10.  
27 doi:10.4187/respcare.01141  
28  
29 21 Jiang J-S, Kao S-J, Wang S-N. Effect of early application of biphasic positive airway pressure on the  
30 outcome of extubation in ventilator weaning. *Respirology* 1999;**4**:161–5. doi:10.1046/j.1440-  
31 1843.1999.00168.x  
32  
33 22 Ferrer M, Valencia M, Nicolas JM, *et al.* Early noninvasive ventilation averts extubation failure in  
34 patients at risk: a randomized trial. *Am J Respir Crit Care Med* 2006;**173**:164–70.  
35 doi:10.1164/rccm.200505-718OC  
36  
37 23 Ferrer M, Sellarés J, Valencia M, *et al.* Non-invasive ventilation after extubation in hypercapnic  
38 patients with chronic respiratory disorders: randomised controlled trial. *The Lancet* 2009;**374**:1082–  
39 8. doi:10.1016/S0140-6736(09)61038-2  
40  
41 24 Parke RL, McGuinness SP. Pressures delivered by nasal high flow oxygen during all phases of the  
42 respiratory cycle. *Respir Care* 2013;**58**:1621–4. doi:10.4187/respcare.02358  
43  
44 25 Riera J, Pérez P, Cortés J, *et al.* Effect of high-flow nasal cannula and body position on end-expiratory  
45 lung volume: a cohort study using electrical impedance tomography. *Respir Care* 2013;**58**:589–96.  
46 doi:10.4187/respcare.02086  
47  
48 26 Lee JH, Rehder KJ, Williford L, *et al.* Use of high flow nasal cannula in critically ill infants, children,  
49 and adults: a critical review of the literature. *Intensive Care Med* 2013;**39**:247–57.  
50 doi:10.1007/s00134-012-2743-5  
51  
52  
53  
54  
55  
56  
57  
58  
59  
60

- 1  
2  
3 27 Roca O, Riera J, Torres F, *et al.* High-flow oxygen therapy in acute respiratory failure. *Respir Care*  
4 2010;**55**:408–13.  
5  
6 28 Mauri T, Turrini C, Eronia N, *et al.* Physiologic Effects of High-flow Nasal Cannula in Acute Hypoxemic  
7 Respiratory Failure. *Am J Respir Crit Care Med* Published Online First: 20 December 2016.  
8 doi:10.1164/rccm.201605-0916OC  
9  
10 29 Frat J-P, Thille AW, Mercat A, *et al.* High-flow oxygen through nasal cannula in acute hypoxemic  
11 respiratory failure. *N Engl J Med* 2015;**372**:2185–96. doi:10.1056/NEJMoa1503326  
12  
13 30 Maggiore SM, Idone FA, Vaschetto R, *et al.* Nasal high-flow versus Venturi mask oxygen therapy  
14 after extubation. Effects on oxygenation, comfort, and clinical outcome. *Am J Respir Crit Care Med*  
15 2014;**190**:282–8. doi:10.1164/rccm.201402-0364OC  
16  
17 31 Hernández G, Vaquero C, González P, *et al.* Effect of postextubation high-flow nasal cannula vs  
18 conventional oxygen therapy on reintubation in low-risk patients: A randomized clinical trial. *JAMA*  
19 2016;**315**:1354–61. doi:10.1001/jama.2016.2711  
20  
21 32 Hernández G, Vaquero C, Colinas L, *et al.* Effect of Postextubation High-Flow Nasal Cannula vs  
22 Noninvasive Ventilation on Reintubation and Postextubation Respiratory Failure in High-Risk  
23 Patients: A Randomized Clinical Trial. *JAMA* 2016;**316**:1565–74. doi:10.1001/jama.2016.14194  
24  
25 33 SPIRIT 2013 explanation and elaboration: guidance for protocols of clinical trials. - PubMed - NCBI.  
26 <https://www.ncbi.nlm.nih.gov/pubmed/23303884> (accessed 8 Jan 2018).  
27  
28 34 Ware JH, Hamel MB. Pragmatic Trials — Guides to Better Patient Care? *N Engl J Med*  
29 2011;**364**:1685–7. doi:10.1056/NEJMp1103502  
30  
31 35 Khilnani GC, Galle AD, Hadda V, *et al.* Non-invasive ventilation after extubation in patients with  
32 chronic obstructive airways disease: a randomised controlled trial. *Anaesth Intensive Care*  
33 2011;**39**:217–23.  
34  
35 36 Kanji S, MacPhee H, Singh A, *et al.* Validation of the Critical Care Pain Observation Tool in Critically Ill  
36 Patients With Delirium: A Prospective Cohort Study. *Crit Care Med* 2016;**44**:943–7.  
37 doi:10.1097/CCM.0000000000001522  
38  
39 37 Sessler CN, Gosnell MS, Grap MJ, *et al.* The Richmond Agitation–Sedation Scale. *Am J Respir Crit*  
40 *Care Med* 2002;**166**:1338–44. doi:10.1164/rccm.2107138  
41  
42 38 Ely EW, Truman B, Shintani A, *et al.* Monitoring sedation status over time in ICU patients: reliability  
43 and validity of the Richmond Agitation-Sedation Scale (RASS). *JAMA* 2003;**289**:2983–91.  
44 doi:10.1001/jama.289.22.2983  
45  
46 39 Ely EW, Margolin R, Francis J, *et al.* Evaluation of delirium in critically ill patients: validation of the  
47 Confusion Assessment Method for the Intensive Care Unit (CAM-ICU). *Crit Care Med* 2001;**29**:1370–  
48 9.  
49  
50  
51  
52  
53  
54  
55  
56  
57  
58  
59  
60

- 1  
2  
3 40 Ely EW, Inouye SK, Bernard GR, *et al.* Delirium in mechanically ventilated patients: validity and  
4 reliability of the confusion assessment method for the intensive care unit (CAM-ICU). *JAMA*  
5 2001;**286**:2703–10.  
6  
7 41 Needham DM. Mobilizing Patients in the Intensive Care Unit: Improving Neuromuscular Weakness  
8 and Physical Function. *JAMA* 2008;**300**:1685–90. doi:10.1001/jama.300.14.1685  
9  
10 42 Harris PA, Taylor R, Thielke R, *et al.* Research Electronic Data Capture (REDCap) - A metadata-driven  
11 methodology and workflow process for providing translational research informatics support. *J*  
12 *Biomed Inform* 2009;**42**:377–81. doi:10.1016/j.jbi.2008.08.010  
13  
14 43 Teasdale G, Jennett B. Assessment of coma and impaired consciousness. A practical scale. *Lancet*  
15 *Lond Engl* 1974;**2**:81–4.  
16  
17 44 Semler MW, Self WH, Rice TW. Balanced Crystalloids versus Saline in Critically Ill Adults. *N Engl J*  
18 *Med* 2018;**378**:1951. doi:10.1056/NEJMc1804294  
19  
20 45 Zeger SL, Liang KY, Albert PS. Models for longitudinal data: a generalized estimating equation  
21 approach. *Biometrics* 1988;**44**:1049–60.  
22  
23 46 Turner RM, White IR, Croudace T, *et al.* Analysis of cluster randomized cross-over trial data: a  
24 comparison of methods. *Stat Med* 2007;**26**:274–89. doi:10.1002/sim.2537  
25  
26 47 Parienti J-J, Kuss O. Cluster-crossover design: a method for limiting clusters level effect in  
27 community-intervention studies. *Contemp Clin Trials* 2007;**28**:316–23.  
28 doi:10.1016/j.cct.2006.10.004  
29  
30 48 Food and Drug Administration (FDA). Multiple Endpoints in Clinical Trials: Guidance for Industry.  
31 Published Online First: January  
32 2017. <https://www.fda.gov/downloads/drugs/guidancecomplianceregulatoryinformation/guidances/ucm536750.pdf>  
33  
34 49 European Medicines Agency. Guideline on multiplicity issues in clinical trials. Published Online First:  
35 December 2016. [https://www.ema.europa.eu/en/documents/scientific-guideline/draft-guideline-multiplicity-issues-clinical-trials\\_en.pdf](https://www.ema.europa.eu/en/documents/scientific-guideline/draft-guideline-multiplicity-issues-clinical-trials_en.pdf)  
36  
37 50 Uniform requirements for manuscripts submitted to biomedical journals. International Committee  
38 of Medical Journal Editors. *JAMA* 1997;**277**:927–34.  
39  
40 51 Esteban A, Alía I, Gordo F, *et al.* Extubation Outcome after Spontaneous Breathing Trials with T-  
41 Tube or Pressure Support Ventilation. *Am J Respir Crit Care Med* 1997;**156**:459–65.  
42 doi:10.1164/ajrccm.156.2.9610109  
43  
44 52 Girault C, Bubenheim M, Abroug F, *et al.* Noninvasive Ventilation and Weaning in Patients with  
45 Chronic Hypercapnic Respiratory Failure. *Am J Respir Crit Care Med* 2011;**184**:672–9.  
46 doi:10.1164/rccm.201101-0035OC  
47  
48  
49  
50  
51  
52  
53  
54  
55  
56  
57  
58  
59  
60

## FIGURES

**Figure 1.** Standard Protocol Items: Recommendations for Interventional Trials (SPIRIT) checklist. Enrollment, Interventions, and Assessments.

**Figure 2.** Group assignment during the trial. During each three-month period of the study, one cluster is assigned to protocolized support (P), and the other to usual care (U).

**Figure 3.** Post-extubation respiratory support protocol. Visual summary of study protocol used at the bedside by a respiratory therapist caring for patients assigned to the protocolized support group.

| TIMEPOINT                       | STUDY PERIOD |            |                          |                             |                                       |
|---------------------------------|--------------|------------|--------------------------|-----------------------------|---------------------------------------|
|                                 | Allocation   | Enrollment | On-Study                 |                             | On-Study                              |
|                                 | Admission    | Extubation | 0-24 hrs post-extubation | 24-96 hours post-extubation | Discharge or 30 days after enrollment |
| <b>ENROLLMENT:</b>              |              | X          |                          |                             |                                       |
| Eligibility screen              | X            | X          |                          |                             |                                       |
| Allocation                      |              | X          |                          |                             |                                       |
| <b>INTERVENTIONS:</b>           |              |            |                          |                             |                                       |
| Protocolized Support            |              |            | X                        |                             |                                       |
| Screening for contraindications | X            | X          | X                        |                             |                                       |
| Usual Care                      |              |            | X                        |                             |                                       |
| Screening for contraindications | X            | X          | X                        |                             |                                       |
| <b>ASSESSMENTS:</b>             |              |            |                          |                             |                                       |
| Baseline Variables              | X            | X          |                          |                             |                                       |
| Peri-procedural variables       |              | X          | X                        | X                           |                                       |
| Clinical Outcomes               |              |            | X                        | X                           | X                                     |

Baseline variables are obtained from electronic medical record and include: indication for intubation, duration of invasive mechanical ventilation, risk factors for reintubation, respiratory rate at extubation, APACHE II score at ICU admission and at extubation, chronic hypercapnia, history of pulmonary disease, history of congestive heart failure, failure of previous spontaneous breathing trial, age, BMI, and other demographic details. Post-extubation variables include: the amount of time spent receiving prophylactic post-extubation respiratory support from 0-96 hours postintubation, the level of support provided with these devices, and the need for rescue treatment with NIV or HFNC to prevent reintubation within 96 hours of extubation. Clinical outcomes include: the need for reintubation within 96 hours (the primary outcome), time to reintubation, indication for reintubation, vital status, number of ventilator-free days to 28 days, and number of ICU-free days to 28 days.



1  
2  
3  
4  
5  
6  
7  
8  
9  
10  
11  
12  
13  
14  
15  
16  
17  
18  
19  
20  
21  
22  
23  
24  
25  
26  
27  
28  
29  
30  
31  
32  
33  
34  
35  
36  
37  
38  
39  
40  
41

|           | Oct '17 | Nov '17 | Dec '17 | Jan '18 | Feb '18 | Mar '18 | Apr '18 | May '18 | Jun '18 | Jul '18 | Aug '18 | Sep '18 | Oct '18 | Nov '18 | Dec '18 | Jan '19 | Feb '19 | Mar '19 |
|-----------|---------|---------|---------|---------|---------|---------|---------|---------|---------|---------|---------|---------|---------|---------|---------|---------|---------|---------|
| Cluster A | U       | U       | U       | P       | P       | P       | U       | U       | U       | P       | P       | P       | U       | U       | U       | P       | P       | P       |
| Cluster B | P       | P       | P       | U       | U       | U       | P       | P       | P       | U       | U       | U       | P       | P       | P       | U       | U       | U       |

# Post-Extubation Support Protocol

1  
2  
3  
4  
5  
6  
7  
8  
9  
10  
11  
12  
13  
14  
15  
16  
17  
18  
19  
20  
21  
22  
23  
24  
25  
26  
27  
28  
29  
30  
31  
32  
33  
34  
35  
36  
37  
38  
39  
40  
41  
42  
43  
44  
45  
46  
47  
48  
49  
50  
51  
52  
53  
54  
55  
56

**Patient undergoing extubation from  
invasive mechanical ventilation**

**Intubated > 12 hours?**

Yes

No

**Suspected hypercapnia\* or  
intubated for COPD Exacerbation**

Yes

No

**Excluded: management  
per treating clinicians**

**Extubate to  
non-invasive ventilation**

Full facemask should be used  
• 1 hour breaks allowed for meals  
Sedatives to increase tolerance are discouraged  
Transition to optiflow if patient has a contraindication to NIV\*\*, declines it, or is unable to tolerate it for > 4 hrs

**Extubate to  
high-flow nasal cannula**

- Non-invasive ventilation is acceptable alternative
- Rescue use of non-invasive ventilation for post-extubation respiratory distress per treating clinicians

**Continue support device until  
5AM on day following extubation**

\*Suspected hypercapnea defined as:  
1. PaCO<sub>2</sub> > 45 mmHg on ABG during SBT  
2. Chronic hypercarbic respiratory failure  
3. Obesity Hypoventilation Syndrome

\*\* Contraindications to NIV:  
1. Facial/cranial trauma  
2. Recent gastric/esophageal surgery  
3. Inability to protect the airway  
4. Active emesis or upper gastrointestinal bleeding  
5. Excessive respiratory secretions  
6. Lack of cooperation

**NIV or HFNC may be restarted after  
discontinuation for respiratory failure at  
discretion of clinical team**

**ONLINE SUPPLEMENT TO:****Protocolized Post-extubation Respiratory Support to Prevent Reintubation:****Protocol and Statistical Analysis Plan for a Randomized Trial**

Jonathan D. Casey, Erin M. Vaughn, Bradley D. Lloyd, Peter A. Bilas, Eric J. Hall, Alexandra H. Toporek, Kevin G. Buell, Ryan M. Brown, Roger K. Richardson, J. Craig Rooks, Li Wang, Chris J. Lindsell, E. Wesley Ely, Wesley H. Self, Gordon R. Bernard, Todd W. Rice, Matthew W. Semler for the Pragmatic Critical Care Research Group.

**Contents**

|                                                                                                                                                                   |    |
|-------------------------------------------------------------------------------------------------------------------------------------------------------------------|----|
| 1. Definitions .....                                                                                                                                              | 2  |
| 2. SPIRIT 2013 Checklist.....                                                                                                                                     | 5  |
| 3. Protocol for Daily Spontaneous Awakening Trial (SAT) Safety Screen, SAT Performance, Spontaneous Breathing Trial (SBT) Safety Screen, and SBT Performance..... | 12 |
| 4. Protocol for Assessment of Agitation (RASS score) .....                                                                                                        | 13 |
| 5. Protocol for Choice of Analgesia and Sedation in Mechanically Ventilated Patients.....                                                                         | 14 |
| 6. Protocol for Delirium Assessment (CAM-ICU) .....                                                                                                               | 15 |
| 7. Protocol for Early Mobility.....                                                                                                                               | 16 |
| 8. Development of the Model for the Primary Analysis .....                                                                                                        | 17 |
| 9. Plan for communication of protocol changes .....                                                                                                               | 18 |
| 10. Patient Privacy and Data Storage.....                                                                                                                         | 19 |
| 11. Patient Privacy and Data Storage.....                                                                                                                         | 20 |
| 12. Data Sharing Plan .....                                                                                                                                       | 21 |
| SUPPLEMENTAL FIGURES.....                                                                                                                                         | 22 |
| Figure S1. PROPER Consort Diagram Template .....                                                                                                                  | 22 |
| Figure S2. Protocol for Initiation, Titration, and Weaning of Non-Invasive Ventilation.....                                                                       | 23 |
| Figure S3. Protocol for Initiation, Titration, and Weaning of High Flow Nasal Cannula.....                                                                        | 24 |

## Supplemental Methods

### 1. Definitions

#### Study Intervention

**Post-extubation respiratory support:** respiratory support with non-invasive ventilation (NIV) or high-flow nasal cannula (HFNC), started immediately following extubation to prevent subsequent respiratory failure

**Rescue therapy:** respiratory support with non-invasive ventilation (NIV) or high-flow nasal cannula (HFNC), started minutes, hours, or days after extubation as treatment for respiratory failure

**Hours to discontinuation of post-extubation respiratory support:** number of hours from extubation to the permanent discontinuation of post-extubation respiratory support. Use of NIV or HFNC as rescue therapy will not be included.

**Duration of respiratory support within the first 24 hours:** number of hours spent receiving either NIV or HFNC as post-extubation respiratory support or as rescue therapy within the first 24 hours following extubation.

1  
2  
3 **Duration of HFNC within the first 24 hours:** number of hours spent receiving HFNC  
4  
5 as post-extubation respiratory support or as rescue therapy within the first 24 hours  
6  
7 following extubation.  
8  
9

10  
11  
12  
13 **Duration of NIV within the first 24 hours:** number of hours spent receiving NIV as  
14  
15 post-extubation respiratory support or as rescue therapy within the first 24 hours  
16  
17 following extubation.  
18  
19  
20  
21  
22  
23  
24  
25  
26  
27  
28  
29  
30  
31  
32  
33  
34  
35  
36  
37  
38  
39  
40  
41  
42  
43  
44  
45  
46  
47  
48  
49  
50  
51  
52  
53  
54  
55  
56  
57  
58  
59  
60



1  
2  
3  
4  
5  
6  
7  
8  
9  
10  
11  
12  
13  
14  
15  
16  
17  
18  
19  
20  
21  
22  
23  
24  
25  
26  
27  
28  
29  
30  
31  
32  
33  
34  
35  
36  
37  
38  
39  
40  
41  
42  
43  
44  
45  
46  
47

**2. SPIRIT 2013 Checklist**

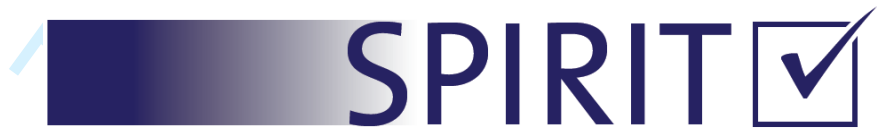

SPIRIT 2013 Checklist: STANDARD PROTOCOL ITEMS: RECOMMENDATIONS FOR INTERVENTIONAL TRIALS

Recommended items to address in a clinical trial protocol and related documents\*

| Section/item                      | Item No | Description                                                                                                  | Addressed on page number |
|-----------------------------------|---------|--------------------------------------------------------------------------------------------------------------|--------------------------|
| <b>Administrative information</b> |         |                                                                                                              |                          |
| Title                             | 1       | Descriptive title identifying the study design, population, interventions, and, if applicable, trial acronym | <u>1, 3, 8</u>           |
| Trial registration                | 2a      | Trial identifier and registry name. If not yet registered, name of intended registry                         | <u>4, 9</u>              |
|                                   | 2b      | All items from the World Health Organization Trial Registration Data Set                                     | <u>1-4</u>               |
| Protocol version                  | 3       | Date and version identifier                                                                                  | <u>2</u>                 |
| Funding                           | 4       | Sources and types of financial, material, and other support                                                  | <u>2</u>                 |
|                                   | 5a      | Names, affiliations, and roles of protocol contributors                                                      | <u>1</u>                 |

|    |                            |    |                                                                                                                                                                                                                                                                                                   |
|----|----------------------------|----|---------------------------------------------------------------------------------------------------------------------------------------------------------------------------------------------------------------------------------------------------------------------------------------------------|
| 1  |                            |    |                                                                                                                                                                                                                                                                                                   |
| 2  |                            |    |                                                                                                                                                                                                                                                                                                   |
| 3  |                            |    |                                                                                                                                                                                                                                                                                                   |
| 4  | Roles and responsibilities | 5b | Name and contact information for the trial sponsor <u>1, 2, 9</u>                                                                                                                                                                                                                                 |
| 5  |                            |    |                                                                                                                                                                                                                                                                                                   |
| 6  |                            |    |                                                                                                                                                                                                                                                                                                   |
| 7  |                            | 5c | Role of study sponsor and funders, if any, in study design; collection, management, analysis, and interpretation of data; writing of the report; and the decision to submit the report for publication, including whether they will have ultimate authority over any of these activities <u>9</u> |
| 8  |                            |    |                                                                                                                                                                                                                                                                                                   |
| 9  |                            |    |                                                                                                                                                                                                                                                                                                   |
| 10 |                            |    |                                                                                                                                                                                                                                                                                                   |
| 11 |                            |    |                                                                                                                                                                                                                                                                                                   |
| 12 |                            |    |                                                                                                                                                                                                                                                                                                   |
| 13 |                            | 5d | Composition, roles, and responsibilities of the coordinating center, steering committee, endpoint adjudication committee, data management team, and other individuals or groups overseeing the trial, if applicable (see Item 21a for data monitoring committee) <u>1, 2</u>                      |
| 14 |                            |    |                                                                                                                                                                                                                                                                                                   |
| 15 |                            |    |                                                                                                                                                                                                                                                                                                   |
| 16 |                            |    |                                                                                                                                                                                                                                                                                                   |
| 17 |                            |    |                                                                                                                                                                                                                                                                                                   |
| 18 |                            |    |                                                                                                                                                                                                                                                                                                   |
| 19 |                            |    |                                                                                                                                                                                                                                                                                                   |
| 20 |                            |    |                                                                                                                                                                                                                                                                                                   |
| 21 |                            |    |                                                                                                                                                                                                                                                                                                   |
| 22 |                            |    |                                                                                                                                                                                                                                                                                                   |
| 23 |                            |    |                                                                                                                                                                                                                                                                                                   |
| 24 | <b>Introduction</b>        |    |                                                                                                                                                                                                                                                                                                   |
| 25 |                            |    |                                                                                                                                                                                                                                                                                                   |
| 26 | Background and rationale   | 6a | Description of research question and justification for undertaking the trial, including summary of relevant studies (published and unpublished) examining benefits and harms for each intervention <u>2</u>                                                                                       |
| 27 |                            |    |                                                                                                                                                                                                                                                                                                   |
| 28 |                            |    |                                                                                                                                                                                                                                                                                                   |
| 29 |                            |    |                                                                                                                                                                                                                                                                                                   |
| 30 |                            |    |                                                                                                                                                                                                                                                                                                   |
| 31 |                            | 6b | Explanation for choice of comparators <u>6-8</u>                                                                                                                                                                                                                                                  |
| 32 |                            |    |                                                                                                                                                                                                                                                                                                   |
| 33 | Objectives                 | 7  | Specific objectives or hypotheses <u>8</u>                                                                                                                                                                                                                                                        |
| 34 |                            |    |                                                                                                                                                                                                                                                                                                   |
| 35 |                            |    |                                                                                                                                                                                                                                                                                                   |
| 36 | Trial design               | 8  | Description of trial design including type of trial (eg, parallel group, crossover, factorial, single group), allocation ratio, and framework (eg, superiority, equivalence, noninferiority, exploratory) <u>9</u>                                                                                |
| 37 |                            |    |                                                                                                                                                                                                                                                                                                   |
| 38 |                            |    |                                                                                                                                                                                                                                                                                                   |
| 39 |                            |    |                                                                                                                                                                                                                                                                                                   |
| 40 |                            |    |                                                                                                                                                                                                                                                                                                   |
| 41 |                            |    |                                                                                                                                                                                                                                                                                                   |
| 42 |                            |    |                                                                                                                                                                                                                                                                                                   |
| 43 |                            |    |                                                                                                                                                                                                                                                                                                   |
| 44 |                            |    |                                                                                                                                                                                                                                                                                                   |
| 45 |                            |    |                                                                                                                                                                                                                                                                                                   |
| 46 |                            |    |                                                                                                                                                                                                                                                                                                   |
| 47 |                            |    |                                                                                                                                                                                                                                                                                                   |



1  
2  
3  
4  
5  
6  
7  
8  
9  
10  
11  
12  
13  
14  
15  
16  
17  
18  
19  
20  
21  
22  
23  
24  
25  
26  
27  
28  
29  
30  
31  
32  
33  
34  
35  
36  
37  
38  
39  
40  
41  
42  
43  
44  
45  
46  
47

**Methods: Participants, interventions, and outcomes**

|                      |     |                                                                                                                                                                                                                                                                                                                                                                                |               |
|----------------------|-----|--------------------------------------------------------------------------------------------------------------------------------------------------------------------------------------------------------------------------------------------------------------------------------------------------------------------------------------------------------------------------------|---------------|
| Study setting        | 9   | Description of study settings (eg, community clinic, academic hospital) and list of countries where data will be collected. Reference to where list of study sites can be obtained                                                                                                                                                                                             | <u>9</u>      |
| Eligibility criteria | 10  | Inclusion and exclusion criteria for participants. If applicable, eligibility criteria for study centers and individuals who will perform the interventions (eg, surgeons, psychotherapists)                                                                                                                                                                                   | <u>10</u>     |
| Interventions        | 11a | Interventions for each group with sufficient detail to allow replication, including how and when they will be administered                                                                                                                                                                                                                                                     | <u>11-15</u>  |
|                      | 11b | Criteria for discontinuing or modifying allocated interventions for a given trial participant (eg, drug dose change in response to harms, participant request, or improving/worsening disease)                                                                                                                                                                                 | <u>11-15</u>  |
|                      | 11c | Strategies to improve adherence to intervention protocols, and any procedures for monitoring adherence (eg, drug tablet return, laboratory tests)                                                                                                                                                                                                                              | <u>11-15</u>  |
|                      | 11d | Relevant concomitant care and interventions that are permitted or prohibited during the trial                                                                                                                                                                                                                                                                                  | <u>15</u>     |
| Outcomes             | 12  | Primary, secondary, and other outcomes, including the specific measurement variable (eg, systolic blood pressure), analysis metric (eg, change from baseline, final value, time to event), method of aggregation (eg, median, proportion), and time point for each outcome. Explanation of the clinical relevance of chosen efficacy and harm outcomes is strongly recommended | <u>18, 19</u> |

|    |             |    |                                                                                       |
|----|-------------|----|---------------------------------------------------------------------------------------|
| 1  |             |    |                                                                                       |
| 2  |             |    |                                                                                       |
| 3  |             |    |                                                                                       |
| 4  | Participant | 13 | Time schedule of enrolment, interventions (including any run-ins and washouts),       |
| 5  | timeline    |    | assessments, and visits for participants. A schematic diagram is highly recommended   |
| 6  |             |    | (see Figure)                                                                          |
| 7  |             |    |                                                                                       |
| 8  | Sample size | 14 | Estimated number of participants needed to achieve study objectives and how it was    |
| 9  |             |    | determined, including clinical and statistical assumptions supporting any sample size |
| 10 |             |    | calculations                                                                          |
| 11 |             |    |                                                                                       |
| 12 |             |    |                                                                                       |
| 13 | Recruitment | 15 | Strategies for achieving adequate participant enrollment to reach target sample size  |
| 14 |             |    |                                                                                       |
| 15 |             |    |                                                                                       |

Figure 119-2019-20

### Methods: Assignment of interventions (for controlled trials)

#### Allocation:

|    |               |     |                                                                                            |
|----|---------------|-----|--------------------------------------------------------------------------------------------|
| 21 | Sequence      | 16a | Method of generating the allocation sequence (eg, computer-generated random                |
| 22 | generation    |     | numbers), and list of any factors for stratification. To reduce predictability of a random |
| 23 |               |     | sequence, details of any planned restriction (eg, blocking) should be provided in a        |
| 24 |               |     | separate document that is unavailable to those who enroll participants or assign           |
| 25 |               |     | interventions                                                                              |
| 26 |               |     |                                                                                            |
| 27 |               |     |                                                                                            |
| 28 | Allocation    | 16b | Mechanism of implementing the allocation sequence (eg, central telephone; sequentially     |
| 29 | concealment   |     | numbered, opaque, sealed envelopes), describing any steps to conceal the sequence          |
| 30 | mechanism     |     | until interventions are assigned                                                           |
| 31 |               |     |                                                                                            |
| 32 |               |     |                                                                                            |
| 33 | Implementatio | 16c | Who will generate the allocation sequence, who will enroll participants, and who will      |
| 34 | n             |     | assign participants to interventions                                                       |
| 35 |               |     |                                                                                            |
| 36 |               |     |                                                                                            |
| 37 | Blinding      | 17a | Who will be blinded after assignment to interventions (eg, trial participants, care        |
| 38 | (masking)     |     | providers, outcome assessors, data analysts), and how                                      |
| 39 |               |     |                                                                                            |
| 40 |               |     |                                                                                            |
| 41 |               |     |                                                                                            |
| 42 |               |     |                                                                                            |
| 43 |               |     |                                                                                            |
| 44 |               |     |                                                                                            |
| 45 |               |     |                                                                                            |
| 46 |               |     |                                                                                            |
| 47 |               |     |                                                                                            |

10, 1110, 1110, 115

1  
2  
3  
4  
5  
6  
7  
8  
9  
10  
11  
12  
13  
14  
15  
16  
17  
18  
19  
20  
21  
22  
23  
24  
25  
26  
27  
28  
29  
30  
31  
32  
33  
34  
35  
36  
37  
38  
39  
40  
41  
42  
43  
44  
45  
46  
47

17b If blinded, circumstances under which unblinding is permissible, and procedure for  
☒ ☒ ☒ ☒ ☒ O ☒ ☒ J ☒ ☒ ☒ ☒ ☒ F ☒ ☒ ☒ ☒ ☒ ☒ ☒ O O ☒ F ☒ ☒ ☒ ☒ 5

**Methods: Data collection, management, and analysis**

Data collection methods 18a Plans for assessment and collection of outcome, baseline, and other trial data, including any related processes to promote data quality (eg, duplicate measurements, training of assessors) and a description of study instruments (eg, questionnaires, laboratory tests) along with their reliability and validity, if known. Reference to where data collection forms can be found, if not in the protocol 16-19

18b Plans to promote participant retention and complete follow-up, including list of any outcome data to be collected for participants who discontinue or deviate from intervention protocols 16,17

Data management 19 Plans for data entry, coding, security, and storage, including any related processes to promote data quality (eg, double data entry; range checks for data values). Reference to where details of data management procedures can be found, if not in the protocol 2

Statistical methods 20a Statistical methods for analyzing primary and secondary outcomes. Reference to where other details of the statistical analysis plan can be found, if not in the protocol 21-22

20b Methods for any additional analyses (eg, subgroup and adjusted analyses) 22-26

20c Definition of analysis population relating to protocol non-adherence (eg, as randomized analysis), and any statistical methods to handle missing data (eg, multiple imputation) 26, 27

**Methods: Monitoring**

|    |                                 |     |                                                                                                                                                                                                                                                                                                                                       |
|----|---------------------------------|-----|---------------------------------------------------------------------------------------------------------------------------------------------------------------------------------------------------------------------------------------------------------------------------------------------------------------------------------------|
| 1  |                                 |     |                                                                                                                                                                                                                                                                                                                                       |
| 2  |                                 |     |                                                                                                                                                                                                                                                                                                                                       |
| 3  |                                 |     |                                                                                                                                                                                                                                                                                                                                       |
| 4  | Data monitoring                 | 21a | Composition of data monitoring committee (DMC); summary of its role and reporting structure; statement of whether it is independent from the sponsor and competing interests; and reference to where further details about its charter can be found, if not in the protocol. Alternatively, an explanation of why a DMC is not needed |
| 5  |                                 |     | <u>20, 21</u>                                                                                                                                                                                                                                                                                                                         |
| 6  |                                 |     |                                                                                                                                                                                                                                                                                                                                       |
| 7  |                                 |     |                                                                                                                                                                                                                                                                                                                                       |
| 8  |                                 |     |                                                                                                                                                                                                                                                                                                                                       |
| 9  |                                 | 21b | Description of any interim analyses and stopping guidelines, including who will have access to these interim results and make the final decision to terminate the trial                                                                                                                                                               |
| 10 |                                 |     | <u>16, 17</u>                                                                                                                                                                                                                                                                                                                         |
| 11 |                                 |     |                                                                                                                                                                                                                                                                                                                                       |
| 12 |                                 |     |                                                                                                                                                                                                                                                                                                                                       |
| 13 | Harms                           | 22  | Plans for collecting, assessing, reporting, and managing solicited and spontaneously reported adverse events and other unintended effects of trial interventions or trial conduct                                                                                                                                                     |
| 14 |                                 |     | <u>16, 17</u>                                                                                                                                                                                                                                                                                                                         |
| 15 |                                 |     |                                                                                                                                                                                                                                                                                                                                       |
| 16 |                                 |     |                                                                                                                                                                                                                                                                                                                                       |
| 17 | Auditing                        | 23  | Frequency and procedures for auditing trial conduct, if any, and whether the process will be independent from investigators and the sponsor                                                                                                                                                                                           |
| 18 |                                 |     | <u>N/A</u>                                                                                                                                                                                                                                                                                                                            |
| 19 |                                 |     |                                                                                                                                                                                                                                                                                                                                       |
| 20 |                                 |     |                                                                                                                                                                                                                                                                                                                                       |
| 21 | <b>Ethics and dissemination</b> |     |                                                                                                                                                                                                                                                                                                                                       |
| 22 |                                 |     |                                                                                                                                                                                                                                                                                                                                       |
| 23 | Research ethics approval        | 24  | Plans for seeking research ethics committee/institutional review board (REC/IRB) approval                                                                                                                                                                                                                                             |
| 24 |                                 |     | <u>9, 28</u>                                                                                                                                                                                                                                                                                                                          |
| 25 |                                 |     |                                                                                                                                                                                                                                                                                                                                       |
| 26 | Protocol amendments             | 25  | Plans for communicating important protocol modifications (eg, changes to eligibility criteria, outcomes, analyses) to relevant parties (eg, investigators, REC/IRBs, trial participants, trial registries, journals, regulators)                                                                                                      |
| 27 |                                 |     | <u>S19</u>                                                                                                                                                                                                                                                                                                                            |
| 28 |                                 |     |                                                                                                                                                                                                                                                                                                                                       |
| 29 |                                 |     |                                                                                                                                                                                                                                                                                                                                       |
| 30 |                                 |     |                                                                                                                                                                                                                                                                                                                                       |
| 31 | Consent or assent               | 26a | Who will obtain informed consent or assent from potential trial participants or authorized surrogates, and how (see Item 32)                                                                                                                                                                                                          |
| 32 |                                 |     | <u>27, 28</u>                                                                                                                                                                                                                                                                                                                         |
| 33 |                                 |     |                                                                                                                                                                                                                                                                                                                                       |
| 34 |                                 |     |                                                                                                                                                                                                                                                                                                                                       |
| 35 |                                 | 26b | Additional consent provisions for collection and use of participant data and biological specimens in ancillary studies, if applicable                                                                                                                                                                                                 |
| 36 |                                 |     | <u>27, 28</u>                                                                                                                                                                                                                                                                                                                         |
| 37 |                                 |     |                                                                                                                                                                                                                                                                                                                                       |
| 38 |                                 |     |                                                                                                                                                                                                                                                                                                                                       |
| 39 | Confidentiality                 | 27  | How personal information about potential and enrolled participants will be collected, shared, and maintained in order to protect confidentiality before, during, and after the trial                                                                                                                                                  |
| 40 |                                 |     | <u>S20</u>                                                                                                                                                                                                                                                                                                                            |
| 41 |                                 |     |                                                                                                                                                                                                                                                                                                                                       |
| 42 |                                 |     |                                                                                                                                                                                                                                                                                                                                       |
| 43 |                                 |     |                                                                                                                                                                                                                                                                                                                                       |
| 44 |                                 |     |                                                                                                                                                                                                                                                                                                                                       |
| 45 |                                 |     |                                                                                                                                                                                                                                                                                                                                       |
| 46 |                                 |     |                                                                                                                                                                                                                                                                                                                                       |
| 47 |                                 |     |                                                                                                                                                                                                                                                                                                                                       |

1  
2  
3  
4  
5  
6  
7  
8  
9  
10  
11  
12  
13  
14  
15  
16  
17  
18  
19  
20  
21  
22  
23  
24  
25  
26  
27  
28  
29  
30  
31  
32  
33  
34  
35  
36  
37  
38  
39  
40  
41  
42  
43  
44  
45  
46  
47

|                               |     |                                                                                                                                                                                                                                                                                     |             |
|-------------------------------|-----|-------------------------------------------------------------------------------------------------------------------------------------------------------------------------------------------------------------------------------------------------------------------------------------|-------------|
| Declaration of interests      | 28  | Financial and other competing interests for principal investigators for the overall trial and each study site                                                                                                                                                                       | <u>2</u>    |
| Access to data                | 29  | Statement of who will have access to the final trial dataset, and disclosure of contractual agreements that limit such access for investigators                                                                                                                                     | <u>2, 9</u> |
| Ancillary and post-trial care | 30  | Provisions, if any, for ancillary and post-trial care, and for compensation to those who suffer harm from trial participation                                                                                                                                                       | <u>N/A</u>  |
| Dissemination policy          | 31a | Plans for investigators and sponsor to communicate trial results to participants, healthcare professionals, the public, and other relevant groups (eg, via publication, reporting in results databases, or other data sharing arrangements), including any publication restrictions | <u>29</u>   |
|                               | 31b | Authorship eligibility guidelines and any intended use of professional writers                                                                                                                                                                                                      | <u>1</u>    |
|                               | 31c | Plans, if any, for granting public access to the full protocol, participant-level dataset, and statistical code                                                                                                                                                                     | <u>21</u>   |
| <b>Appendices</b>             |     |                                                                                                                                                                                                                                                                                     |             |
| Informed consent materials    | 32  | Model consent form and other related documentation given to participants and authorized surrogates                                                                                                                                                                                  | <u>N/A</u>  |
| Biological specimens          | 33  | Plans for collection, laboratory evaluation, and storage of biological specimens for genetic or molecular analysis in the current trial and for future use in ancillary studies, if applicable                                                                                      | <u>N/A</u>  |

---

\*It is strongly recommended that this checklist be read in conjunction with the SPIRIT 2013 Explanation & Elaboration for important clarification on the items. Amendments to the protocol should be tracked and dated. The SPIRIT checklist is copyrighted by the SPIRIT Group  Attribution-NonCommercial-NoDerivs 4.0 Unported  O  F  

3. Protocol for Daily Spontaneous Awakening Trial (SAT) Safety Screen, SAT Performance, Spontaneous Breathing Trial (SBT) Safety Screen, and SBT Performance

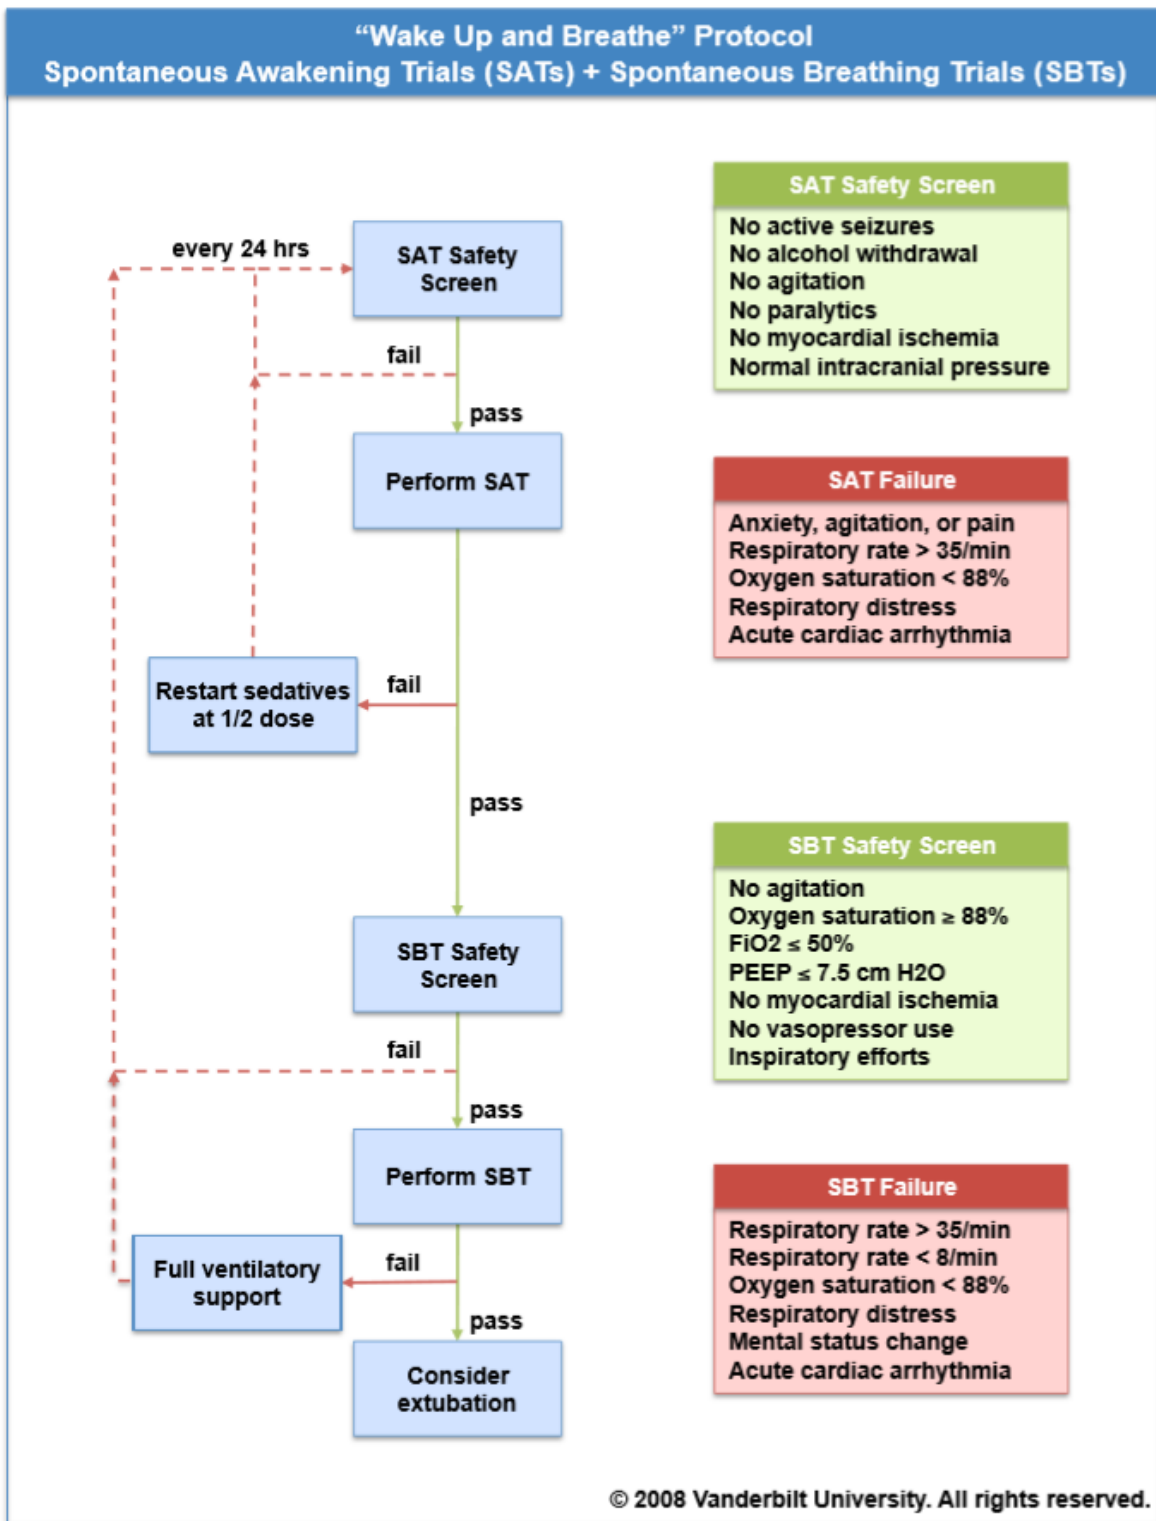

## 4. Protocol for Assessment of Agitation (RASS score)

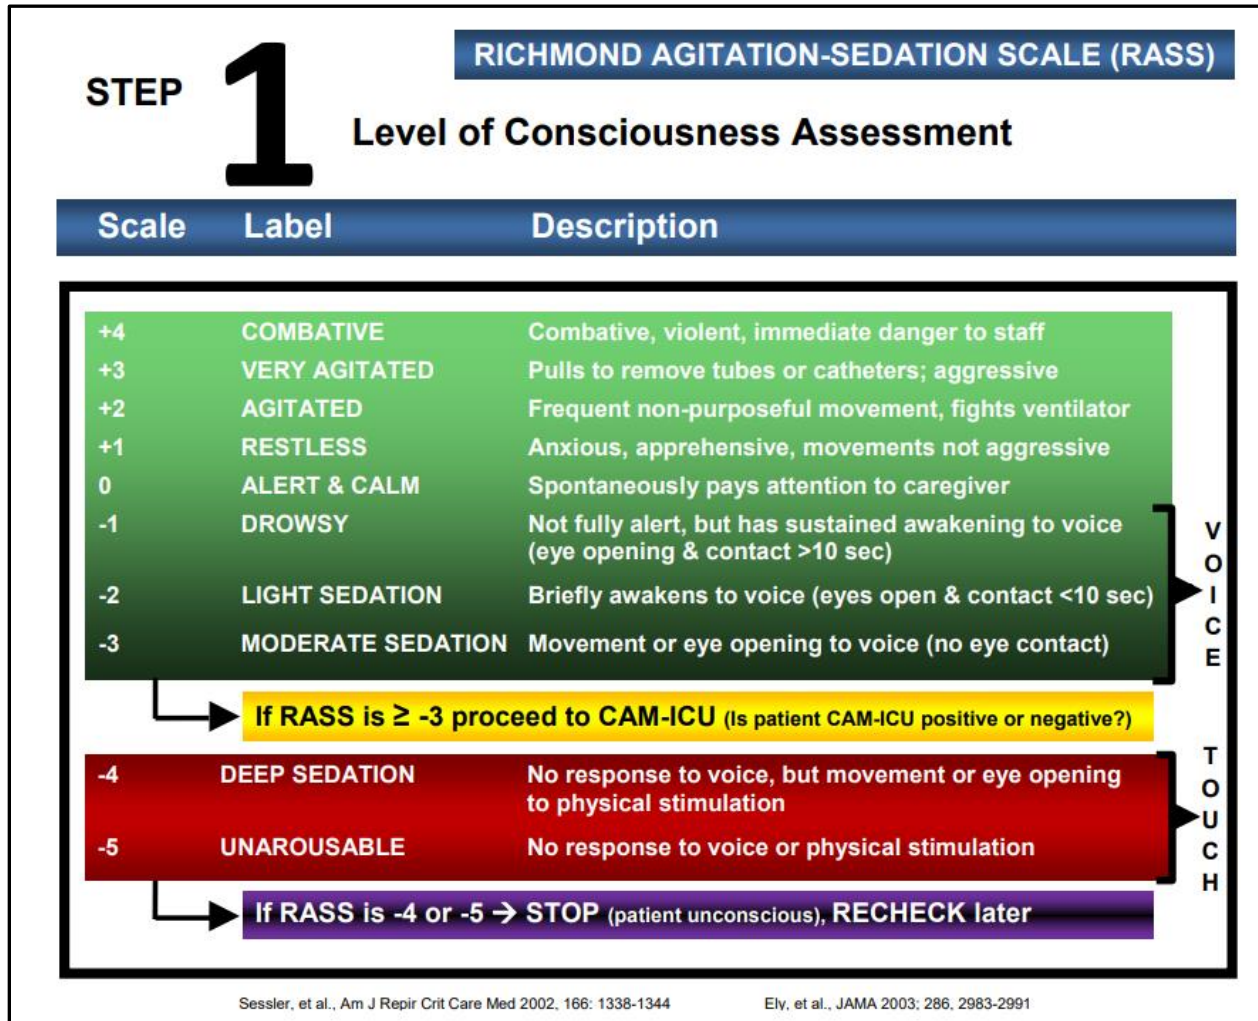

## 5. Protocol for Choice of Analgesia and Sedation in Mechanically Ventilated Patients

- Analgesia
  - a. Intermittent Dosing
    - i. Fentanyl 50 mcg IV push every 15 minutes to goal CPOT  $\leq 3$ , then 50mcg IV push every 2 hours as needed to maintain a CPOT  $\leq 3$
    - ii. Hydromorphone 0.2 mg IV push every 15 minutes to goal CPOT  $\leq 3$ , then 0.2 mg IV push every 4 hours as needed to maintain CPOT  $\leq 3$
    - iii. Morphine 2 mg IV push every 15 minutes to goal CPOT  $\leq 3$ , then 2 mg IV push as needed to maintain CPOT  $\leq 3$
  - b. Continuous Infusions
    - i. None
    - ii. Fentanyl infusion 50mcg/hr, titrate by 25 mcg/hr every 15 minutes to goal CPOT score  $\leq 3$ . Max infusion rate 400mcg/hr. NHO when CPOT target not met with maximum rate.
    - iii. Morphine infusion 2mg/hr, titrate by 0.5mg/hr every 15 minutes to goal CPOT score  $\leq 3$ . Max infusion rate 20 mg/hr. NHO when CPOT target not met with maximum rate.
- Sedation
  - a. None (if RASS at goal with analgesia-based regimen)
  - b. Propofol Infusion 5mcg/kg/min, titrate by 5mcg/kg/min every 15 minutes to goal RASS. Max rate of 50mcg/kg/min. NHO when RASS target not met with maximum rate.
  - c. Dexmedetomidine Infusion 0.2mcg/kg/hr, titrate by 0.1 mcg/kg/hr every 15 minutes to goal RASS. Max rate 1.5 mcg/kg/hr. NHO when RASS target not met with maximum rate.

For propofol intolerance consider one of the following:

  - d. Midazolam 1mg IV push every 2 hours as needed to meet goal RASS.
  - e. Midazolam Infusion 0.5mg/hr, titrate by 0.5mg/hr every 15 minutes to achieve goal RASS. Max infusion rate 10mg/hr. NHO when RASS target not met with maximum rate.

(Propofol intolerance refers to propofol infusion syndrome, hemodynamic instability precluding propofol use, elevated creatinine phosphokinase (CPK) >5000 International units/L, triglycerides >500mg/dl, or propofol use >96 hours)



## 6. Protocol for Delirium Assessment (CAM-ICU)

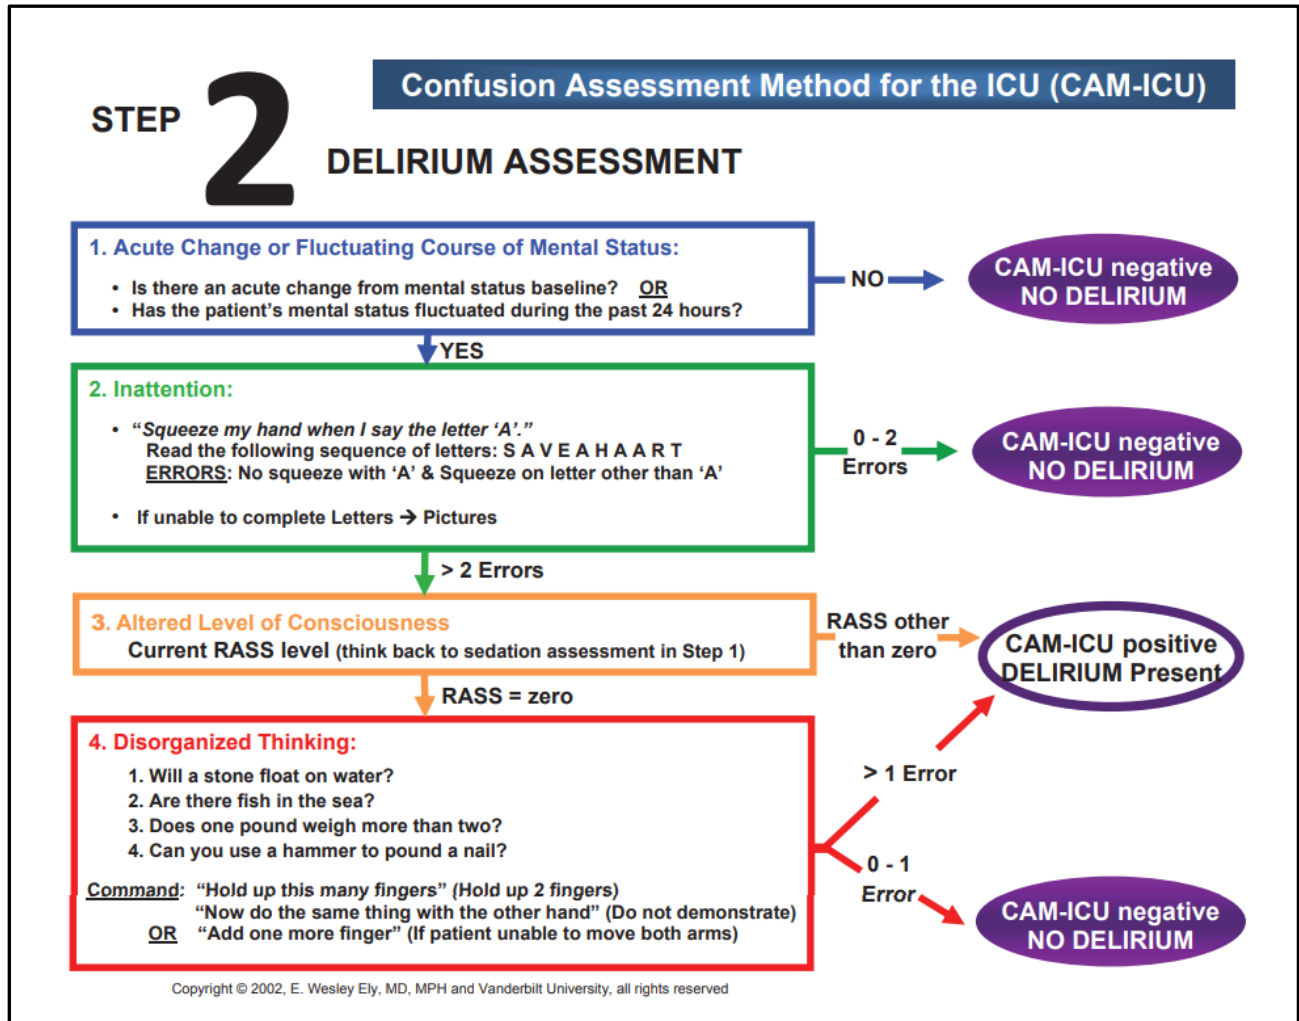

### 7. Protocol for Early Mobility

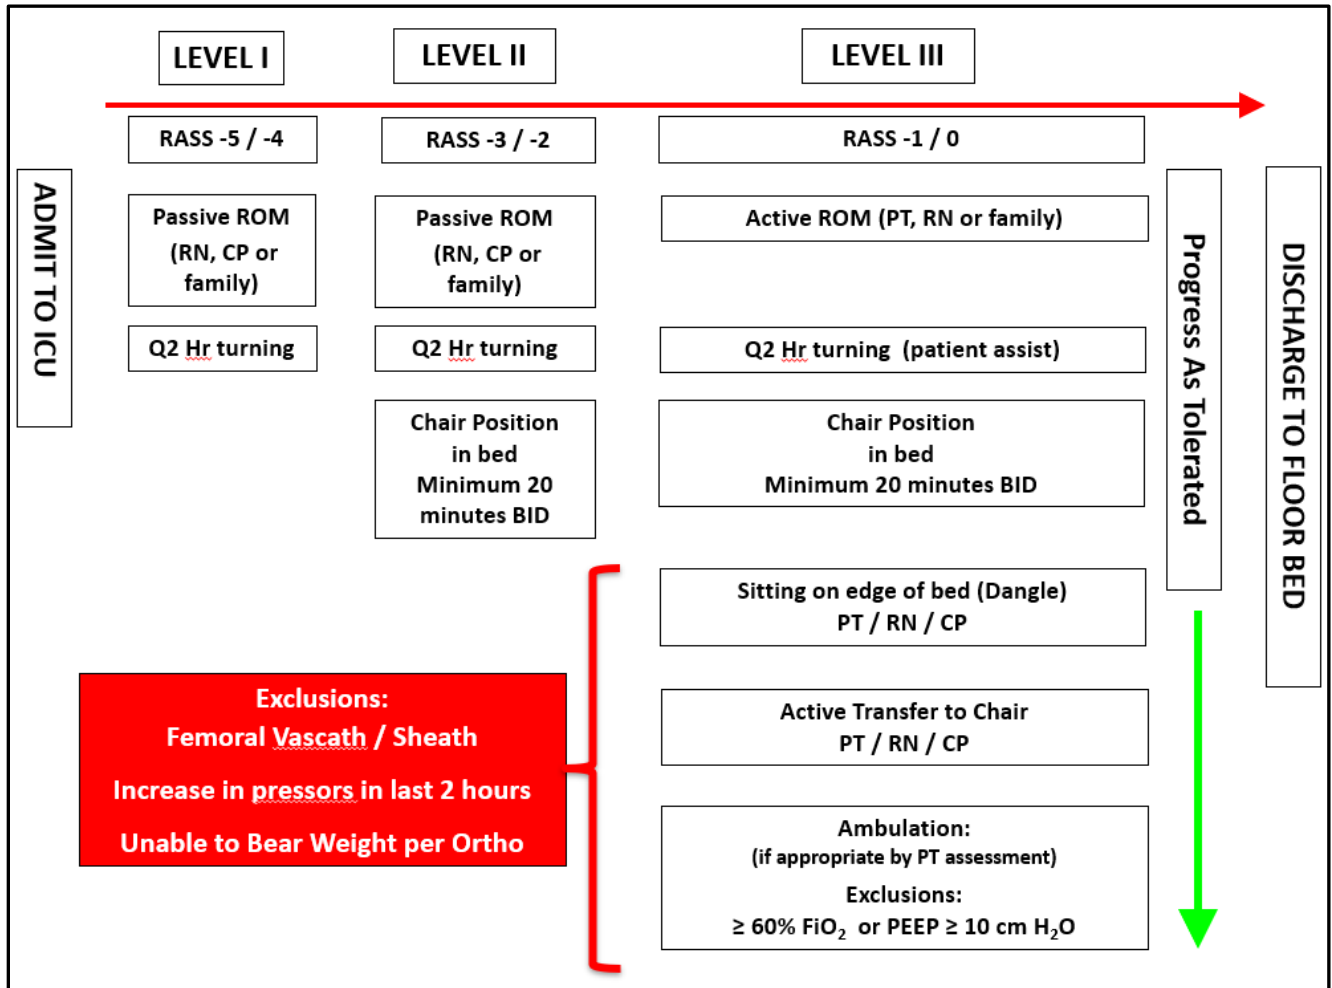

Only

## 8. Development of the Model for the Primary Analysis

In preparation for PROPER, we collected data on the provision of post-extubation respiratory support and the incidence of reintubation from 420 patients who met inclusion/exclusion criteria for PROPER in a 12-month period (6/1/2015 to 5/31/2016) prior to the trial. Using generalized linear mixed-effects modeling treating the two geographic regions of the unit as clusters and the four 3-month blocks as periods, we calculated the intra-cluster correlation coefficient to be  $<0.001$ , the intra-period correlation coefficient to be  $<0.001$ , and the intra-cluster intra-period correlation coefficient to be  $<0.001$ .

### 9. Plan for communication of protocol changes

Any changes to the trial protocol (eg, changes to eligibility criteria, outcomes, analyses) will require a new version of the full trial protocol which will be tracked with the date of the update and the version number of the trial protocol. A list summarizing the changes that are made with each protocol revision will be included at the end of each protocol. The updated protocol will be sent to the Vanderbilt IRB for tracking and approval prior to implementation of the protocol change. At the time of publication, the original trial protocol and the final trial protocol, including the summary of changes made with each protocol change, will be included in the supplementary material for publication.

## 10. Patient Privacy and Data Storage

At no time during the course of this study, its analysis, or its publication will patient identities be revealed in any manner. The minimum necessary data containing patient or provider identities is collected. All patients are assigned a unique study ID number for tracking. Data collected from the medical record is entered into the secure online database REDCap. Hard copies of the data collection sheet completed at the time of the airway management event are stored in a locked room until after the completion of enrollment and data cleaning. Once data are verified and the database is locked, all hard copies of data collection forms will be destroyed. All data is maintained in the secure online database REDCap until the time of study publication. At the time of publication, a de-identified database will be generated.

## 11. Patient Privacy and Data Storage

At no time during the course of this study, its analysis, or its publication will patient identities be revealed in any manner. The minimum necessary data containing patient or provider identities is collected. All patients are assigned a unique study ID number for tracking. Data collected from the medical record is entered into the secure online database REDCap. Hard copies of the data collection sheet completed at the time of the airway management event are stored in a locked room until after the completion of enrollment and data cleaning. Once data are verified and the database is locked, all hard copies of data collection forms will be destroyed. All data is maintained in the secure online database REDCap until the time of study publication. At the time of publication, a de-identified database will be generated.

## 12. Data Sharing Plan

Upon reasonable request, a completely de-identified data set may be provided by the authors. Request to share data from the PROPER trial should be sent to the principal investigator, Jonathan Casey, MD at Jonathan.D.Casey@vumc.org. The data set will be provided to researchers whose proposed use of the data has been approved by the steering committee and an Institutional Review Board.

**SUPPLEMENTAL FIGURES**

**Figure S1. PROPER Consort Diagram Template**

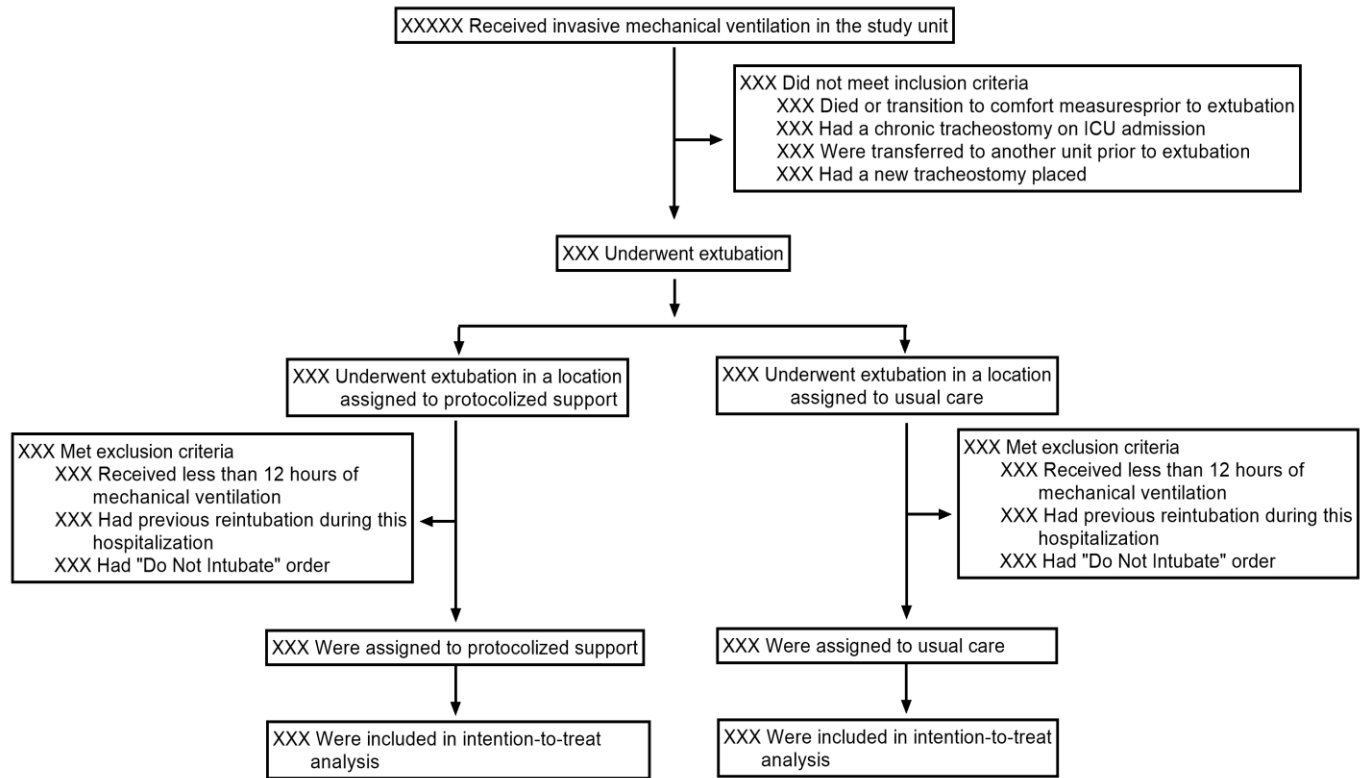



## Figure S2. Protocol for Initiation, Titration, and Weaning of Non-Invasive Ventilation

### Consensus Protocols for Non-Invasive Ventilation (BiPAP) Initiation, Titration and Weaning

#### Initiating and Titrating Non-invasive Ventilation:

1. Initiate NIV with IPAP = 14 and EPAP =8 (or home settings if available)
2. Set back up respiratory rate to 12
3. Titrate fraction inspired oxygen (FIO<sub>2</sub>) to maintain oxygen saturation > 90%
4. Titrate IPAP/EPAP settings to achieve:
  - a. Minute Ventilation of > 5.0 and < 10.0 liters per minute
  - b. Respiratory rate < 30
  - c. Maximum IPAP of 20 cm/H<sub>2</sub>O

#### Weaning Non-Invasive Ventilation:

Patient clinically improving with:

- FIO weaned to 40%
- Respiratory rate <25
- Minute Ventilation <10 l/m
- O<sub>2</sub> Sat > 90%

Yes

- Reduce IPAP to 10
- Reduce EPAP to 5
- Reduce back up RR to 8
- Maintain FiO<sub>2</sub> of 40%

→ Patient clinically stable after 1 hour?

Yes

- Place V60 on Standby
- Transfer Patient Oxygen Administration Protocol

No

No

### Figure S3. Protocol for Initiation, Titration, and Weaning of High Flow Nasal Cannula

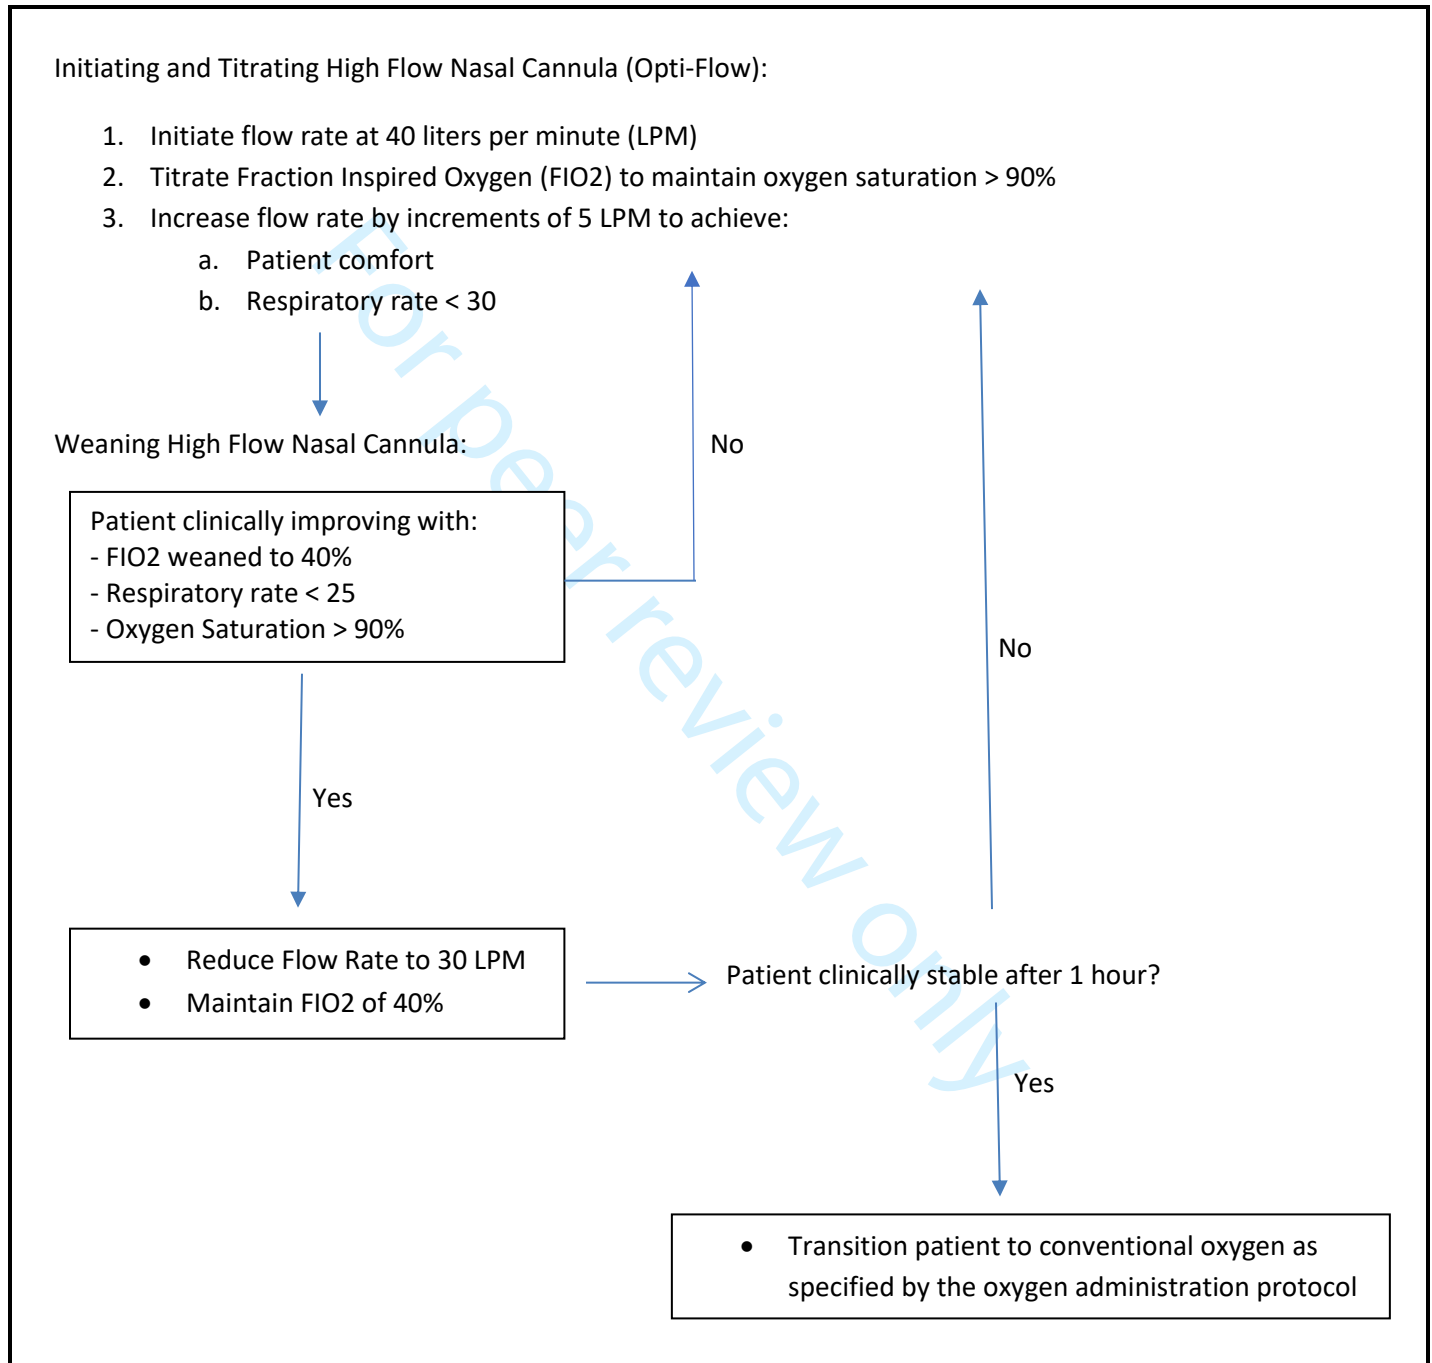

# BMJ Open

## Protocolized Post-Extubation Respiratory Support to Prevent Reintubation: Protocol and Statistical Analysis Plan for a Clinical Trial

|                                 |                                                                                                                                                                                                                                                                                                                                                                                                                                                                                                                                                                                                                                                                                                                                                                                                                                                                                                                                                                                                                                                                                                                                                                                                                                                |
|---------------------------------|------------------------------------------------------------------------------------------------------------------------------------------------------------------------------------------------------------------------------------------------------------------------------------------------------------------------------------------------------------------------------------------------------------------------------------------------------------------------------------------------------------------------------------------------------------------------------------------------------------------------------------------------------------------------------------------------------------------------------------------------------------------------------------------------------------------------------------------------------------------------------------------------------------------------------------------------------------------------------------------------------------------------------------------------------------------------------------------------------------------------------------------------------------------------------------------------------------------------------------------------|
| Journal:                        | <i>BMJ Open</i>                                                                                                                                                                                                                                                                                                                                                                                                                                                                                                                                                                                                                                                                                                                                                                                                                                                                                                                                                                                                                                                                                                                                                                                                                                |
| Manuscript ID                   | bmjopen-2019-030476.R1                                                                                                                                                                                                                                                                                                                                                                                                                                                                                                                                                                                                                                                                                                                                                                                                                                                                                                                                                                                                                                                                                                                                                                                                                         |
| Article Type:                   | Protocol                                                                                                                                                                                                                                                                                                                                                                                                                                                                                                                                                                                                                                                                                                                                                                                                                                                                                                                                                                                                                                                                                                                                                                                                                                       |
| Date Submitted by the Author:   | 06-Jun-2019                                                                                                                                                                                                                                                                                                                                                                                                                                                                                                                                                                                                                                                                                                                                                                                                                                                                                                                                                                                                                                                                                                                                                                                                                                    |
| Complete List of Authors:       | Casey, Jonathan; Vanderbilt University Medical Center, Allergy, Pulmonary, and Critical Care<br>Vaughan, Erin; Vanderbilt University Medical Center<br>Lloyd, Bradley; Vanderbilt University Medical Center, Respiratory Therapy<br>Bilas, Peter; University of Florida, Anesthesia<br>Hall, Eric; Vanderbilt University Medical Center, Internal Medicine<br>Toporek, Alexandra ; Vanderbilt University Medical Center, Internal Medicine<br>Buell, Kevin; Vanderbilt University Medical Center, Internal Medicine<br>Brown, Ryan; Vanderbilt University Medical Center<br>Richardson, Roger; Vanderbilt University Medical Center, Respiratory Therapy<br>Rooks, Jeffery; Vanderbilt University Medical Center, Respiratory Therapy<br>Wang, Li; Vanderbilt University Medical Center, Biostatistics<br>Lindsell, Christopher; Vanderbilt University Medical Center, Biostatistics<br>Ely, E. Wesley; Vanderbilt University Medical Center, Center for Critical Illness, Brain dysfunction & Survivorship (CIBS)<br>Self, Wesley; Vanderbilt University Medical Center, Emergency Medicine<br>Bernard, GR; Vanderbilt University Medical Center<br>Rice, TW; Vanderbilt University,<br>Semler, Matthew; Vanderbilt University Medical Center |
| <b>Primary Subject Heading</b>: | Intensive care                                                                                                                                                                                                                                                                                                                                                                                                                                                                                                                                                                                                                                                                                                                                                                                                                                                                                                                                                                                                                                                                                                                                                                                                                                 |
| Secondary Subject Heading:      | Anaesthesia, Respiratory medicine                                                                                                                                                                                                                                                                                                                                                                                                                                                                                                                                                                                                                                                                                                                                                                                                                                                                                                                                                                                                                                                                                                                                                                                                              |
| Keywords:                       | Adult intensive & critical care < ANAESTHETICS, Adult intensive & critical care < INTENSIVE & CRITICAL CARE, Respiratory physiology < THORACIC MEDICINE                                                                                                                                                                                                                                                                                                                                                                                                                                                                                                                                                                                                                                                                                                                                                                                                                                                                                                                                                                                                                                                                                        |
|                                 |                                                                                                                                                                                                                                                                                                                                                                                                                                                                                                                                                                                                                                                                                                                                                                                                                                                                                                                                                                                                                                                                                                                                                                                                                                                |

SCHOLARONE™  
Manuscripts

1  
2  
3  
4  
5  
6  
7  
8  
9  
10  
11  
12  
13  
14  
15  
16  
17  
18  
19  
20  
21  
22  
23  
24  
25  
26  
27  
28  
29  
30  
31  
32  
33  
34  
35  
36  
37  
38  
39  
40  
41  
42  
43  
44  
45  
46  
47  
48  
49  
50  
51  
52  
53  
54  
55  
56  
57  
58  
59  
60

## Protocolized Post-Extubation Respiratory Support to Prevent Reintubation: Protocol and Statistical Analysis Plan for a Clinical Trial

Jonathan D. Casey MD<sup>1</sup>, Erin M. Vaughn BA<sup>1</sup>, Bradley D. Lloyd RRT-ACCS<sup>2</sup>, Peter A. Bilas MD<sup>3</sup>, Eric J. Hall MD<sup>4</sup>, Alexandra H. Toporek MD<sup>4</sup>, Kevin G. Buell MBBS<sup>4</sup>, Ryan M. Brown<sup>1</sup> MD, Roger K. Richardson RRT-ACCS<sup>2</sup>, J. Craig Rooks RRT-MMHC<sup>2</sup>, Li Wang, MS<sup>5</sup>, Christopher J. Lindsell PhD<sup>5</sup>, E. Wesley Ely MD, MPH<sup>1</sup>, Wesley H. Self MD, MPH<sup>6</sup>, Gordon R. Bernard MD<sup>1</sup>, Todd W. Rice, MD, MSc<sup>1</sup>, Matthew W. Semler, MD, MSc<sup>1</sup> for the Pragmatic Critical Care Research Group.

Affiliations: 1: Division of Allergy, Pulmonary, and Critical Care Medicine, Vanderbilt University Medical Center, Nashville, TN; 2: Division of Respiratory Care, Vanderbilt University Medical Center; 3: Department of Anesthesiology, University of Florida; 4: Department of Medicine, Vanderbilt University Medical Center; 5: Department of Biostatistics, Vanderbilt University Medical Center; 6: Department of Emergency Medicine, Vanderbilt University Medical Center

Corresponding author:

Jonathan D. Casey, MD, MSc

T-1218 MCN, 1161 21st Ave S., Nashville, TN 37232-2650

Fax: (615) 343-7448

Corresponding Author's Email Address: [Jonathan.d.Casey@vanderbilt.edu](mailto:Jonathan.d.Casey@vanderbilt.edu)

Authors contributions: Study concept and design: J.D.C., T.W.R., M.W.S.; Acquisition of data: J.D.C., E.M.V., B.D.L., P.A.B., E.J.H., A.H.T., K.G.B., R.M.B., R.K.R., J.C.R. M.W.S.; Analysis and interpretation of data: J.D.C, and M.W.S.; Drafting of the manuscript: J.D.C, M.W.S.; Critical revision of the manuscript for important intellectual content: J.D.C., C.J.L., E.W.E, W.H.S., G.R.B, T.W.R., M.W.S.; Statistical analysis: J.D.C., L.W., C.J.L., and M.W.S.; Study supervision: T.W.R.

Sources of Funding:

1  
2  
3 This study was supported in part by the Vanderbilt CTSA grant UL1TR002243 from  
4 NCATS/NIH. Jonathan D. Casey was supported in part by the NIH (2T32HL087738-  
5 12). Matthew W. Semler was supported in part by the NHLBI (K12HL133117 and  
6 K23HL143053). Todd W. Rice was supported in part by the NIH (R34HL105869). Data  
7 collection used the Research Electronic Data Capture (REDCap) tool developed and  
8 maintained with Vanderbilt Institute for Clinical and Translational Research grant  
9 support (UL1 TR000445 from NCATS/NIH).  
10  
11  
12  
13  
14  
15

16  
17 The funding institutions had no role in (1) conception, design, or conduct of the study,  
18 (2) collection, management, analysis, interpretation, or presentation of the data, or (3)  
19 preparation, review, or approval of the manuscript.  
20  
21  
22  
23

24 Conflicts of Interest: All authors completed and submitted the ICMJE Form for  
25 Disclosure of Potential Conflicts of Interest. The authors declared no potential conflicts  
26 of interest with the current work. Todd W. Rice reported serving as a consultant for  
27 Avisa Pharma, LLC, and as the Director of Medical Affairs for Cumberland  
28 Pharmaceuticals, Inc.  
29  
30  
31  
32  
33

34 Key words for indexing: Mechanical ventilation, Reintubation, Post-extubation, High flow  
35 nasal cannula, Non-invasive ventilation  
36  
37  
38

39 Subject Descriptor Number: 4.4 Clinical Trials in Critical Care Medicine  
40  
41  
42

43 Manuscript Word Count (body only): 6,096

44 Abstract Word Count: 293  
45  
46  
47

48 Submission Date: 3/13/19

49 Version: 1.0  
50  
51  
52

53 Supplemental digital content is available for this article.  
54  
55  
56  
57

**ABSTRACT:**

**Introduction:** Following extubation from invasive mechanical ventilation, nearly 1 in 7 critically ill adults requires reintubation. Reintubation is independently associated with increased mortality. Post-extubation respiratory support (non-invasive ventilation or high flow nasal cannula applied at the time of extubation) has been reported in small-to-moderate sized trials to reduce reintubation rates among hypercapnic patients, high-risk patients without hypercapnia, and low-risk patients without hypercapnia. It is unknown whether protocolized provision of post-extubation respiratory support to every patient undergoing extubation would reduce the overall reintubation rate, compared to usual care.

**Methods and Analysis:** The Protocolized Post-Extubation Respiratory Support (PROPER) trial is a pragmatic, cluster-crossover trial being conducted between October 1, 2017 and March 31, 2019 in the medical intensive care unit of Vanderbilt University Medical Center. PROPER compares usual care versus protocolized post-extubation respiratory support (a respiratory therapist-driven protocol that advises the provision of non-invasive ventilation or high flow nasal cannula based on patient characteristics). For the duration of the trial, the unit is divided into two clusters. One cluster receives protocolized support and the other receives usual care. Each cluster crosses over between treatment group assignments every three months. All adults undergoing extubation from invasive mechanical ventilation are enrolled except those who received less than 12 hours of mechanical ventilation, have “Do Not Intubate” orders, or have been previously reintubated during the hospitalization. The anticipated enrollment is approximately 630 patients. The primary outcome is reintubation within 96 hours of extubation.

1  
2  
3 **Ethics and dissemination:** The trial was approved by the Vanderbilt Institutional  
4  
5 Review Board. The results will be submitted for publication in a peer-reviewed journal  
6  
7 and presented at one or more scientific conferences. The trial was registered with  
8  
9 ClinicalTrials.gov (NCT03288311) on September 20, 2017, prior to the enrollment of the  
10  
11 first patient on October 1, 2017.  
12  
13  
14  
15  
16  
17  
18  
19  
20  
21  
22  
23  
24  
25  
26  
27  
28  
29  
30  
31  
32  
33  
34  
35  
36  
37  
38  
39  
40  
41  
42  
43  
44  
45  
46  
47  
48  
49  
50  
51  
52  
53  
54  
55  
56  
57  
58  
59  
60

For peer review only



## ARTICLE SUMMARY

### *Strengths and limitations of this study*

- This ongoing pragmatic trial will provide the first comparison of clinical outcomes between protocolized post-extubation respiratory support and usual care following extubation of critically ill adults
- The broad inclusion criteria will increase generalizability and the moderately large size will provide the opportunity to examine subgroups of interest
- The trial is being conducted at a single center
- The nature of the study intervention does not allow blinding
- Decisions regarding management of post-extubation respiratory failure and reintubation are deferred to the clinical team

## INTRODUCTION

Up to 40% of patients admitted to an intensive care unit require invasive mechanical ventilation [1]. Protocols for low tidal volume ventilation, daily spontaneous awakening trials, and daily spontaneous breathing trials have considerably shortened the duration of invasive mechanical ventilation and improved outcomes for these patients [2,3].

Despite these improvements, the period of time following extubation remains high risk, with rates of reintubation between 10 and 15% in the first 96 hours after extubation [4–8]. Reintubation is associated with increased rates of nosocomial infection [9] and is independently associated with an increased risk of death [7,10,11]. Despite significant improvements in the management of patients receiving invasive mechanical ventilation, the rate of reintubation has not changed meaningfully over the last 20 years [12–14].

One of the few therapies suggested to reduce the rate of reintubation is post-extubation respiratory support with either non-invasive ventilation (NIV) or high flow nasal cannula (HFNC).

For patients with respiratory failure from an acute exacerbation of chronic obstructive pulmonary disease (COPD) [15] and cardiogenic pulmonary edema [16], NIV can prevent the need for the initial intubation, improve the safety for those progressing to intubation [17], allow earlier extubation [18–20], and decrease mortality. Among patients who experience respiratory failure after extubation, however, the data have been disappointing. “Rescue” NIV, applied when a patient develops respiratory failure hours or days after extubation, delays the time to reintubation and may be associated with an increase in ICU mortality [21,22]. Post-extubation respiratory support with NIV,

1  
2  
3 started at the time of extubation as prevention, not as treatment for recurrent respiratory  
4 failure after extubation, has had more promising initial results.  
5  
6

7  
8 In unselected ICU populations, several trials failed to demonstrate significant benefit  
9 of post-extubation respiratory support with NIV [23,24], but success has been observed  
10 in targeted sub-populations, specifically those presumed to be at high risk. These trials  
11 have defined risk of re-intubation using various criteria, including duration of ventilation,  
12 age greater than 65, Acute Physiology and Chronic Health Evaluation (APACHE) II  
13 score exceeding 12 on the day of extubation, congestive heart failure, hypercapnia,  
14 weak cough, upper airway stridor, and co-morbidities. For these high-risk patients, post-  
15 extubation support with NIV may decrease the rate of reintubation [5,25]. For patients  
16 who are hypercapnic during a spontaneous breathing trial, post-extubation support with  
17 NIV appears to reduce reintubation and improve 90-day mortality [26]. Recent national  
18 guidelines for management following extubation recommend post-extubation respiratory  
19 support with NIV for patients at high risk of reintubation [3]. While “high-risk” was not  
20 defined in these guidelines, it was suggested that the criteria may include hypercapnia,  
21 COPD, congestive heart failure, or other serious comorbidities.  
22  
23  
24  
25  
26  
27  
28  
29  
30  
31  
32  
33  
34  
35  
36  
37  
38  
39

40 HFNC, a device capable of providing 100% oxygen at flow rates that exceed peak  
41 inspiratory flow rates, decreases work of breathing, provides a low level of continuous  
42 positive airway pressure, washes out dead space, and improves patient comfort and  
43 secretion management [27–33]. HFNC may decrease mortality in non-intubated  
44 patients with hypoxemic respiratory failure [34]. In non-hypercapnic patients undergoing  
45 extubation in a medical ICU, post-extubation respiratory support with HFNC, started at  
46 the time of extubation and continued for 24 to 48 hours, has been reported to reduce  
47  
48  
49  
50  
51  
52  
53  
54  
55  
56  
57  
58  
59  
60

1  
2  
3 the rate of reintubation in high risk patients, low risk patients, and a general population  
4  
5 of ICU patients [35–37].  
6

7  
8 In combination, these studies raise the hypothesis that all critically ill adults  
9  
10 undergoing extubation from invasive mechanical ventilation might benefit from some  
11  
12 form of post-extubation respiratory support, either NIV or HFNC. Concerns remain,  
13  
14 however, that results of recent studies may not generalize to the broader population of  
15  
16 patients extubated in intensive care units outside of the settings in which the studies  
17  
18 were conducted. Rates of reintubation in reported trials range from 14.4% in “low risk”  
19  
20 patients [36] to 19.1% for “high-risk” patients [37], considerably higher than the 10%  
21  
22 reintubation rate cited by large national registries [8]. Use of any form of post-  
23  
24 extubation respiratory support during routine clinical practice remains uncommon at  
25  
26 many centers.  
27  
28  
29

30  
31 Given the potential benefits for post-extubation respiratory support for multiple  
32  
33 patient populations, the low uptake in current usual care in many settings, and concerns  
34  
35 about generalizability from prior explanatory trials, an effectiveness trial among critically  
36  
37 ill adults undergoing extubation from mechanical ventilation is warranted. We designed  
38  
39 the Protocolized Post-Extubation Respiratory Support (PROPER) Trial to determine the  
40  
41 overall effect of a protocolized approach to post-extubation support (protocolized  
42  
43 support) on the primary outcome of reintubation within the 96 hours of extubation,  
44  
45 among a broad population of critically ill adults receiving invasive mechanical  
46  
47 ventilation.  
48  
49  
50

## 51 52 53 **METHODS AND ANALYSIS** 54 55 56 57

1  
2  
3 This manuscript was prepared in accordance with Standard Protocol Items:  
4  
5 Recommendations for Interventional Trials (SPIRIT) guidelines (Fig. 1; SPIRIT checklist  
6  
7 in online supplement, section 1). [38]  
8  
9  
10

### 11 12 *Study Design* 13

14  
15 The Protocolized Post-Extubation Respiratory Support (PROPER) Trial is a  
16  
17 prospective, unblinded, pragmatic, cluster-crossover trial being conducted between  
18  
19 October 1, 2017 and March 31, 2019 in the medical intensive care unit of Vanderbilt  
20  
21 University Medical Center in Nashville, TN, USA. PROPER compares the rate of  
22  
23 reintubation within 96 hours of extubation between patients provided protocolized  
24  
25 support (a respiratory therapist-driven protocol that advises the provision of non-  
26  
27 invasive ventilation or high flow nasal cannula based on patient characteristics), to usual  
28  
29 care (where post-extubation management is at the discretion of treating clinicians).  
30  
31 Consistent with the concept of a pragmatic clinical trial [39], the eligibility criteria are  
32  
33 broad and the study procedures are embedded into routine care and executed by  
34  
35 clinical personnel. The goal is to evaluate the effectiveness of protocolized support  
36  
37 when applied to “real-world” practice. The trial was approved by the Vanderbilt  
38  
39 University Medical Center Institutional Review Board (IRB) with waiver of informed  
40  
41 consent (IRB 170650). The trial is investigator-initiated with funding provided by the  
42  
43 Vanderbilt Institute for Clinical and Translational Research through a Clinical and  
44  
45 Translational Science Award from the National Center for Advancing Translational  
46  
47 Sciences (UL1 TR000445). The trial protocol was registered with ClinicalTrials.gov  
48  
49 prior to initiation of patient enrollment (ClinicalTrials.gov identifier: NCT03288311).  
50  
51  
52  
53  
54  
55  
56  
57  
58  
59  
60

### *Patient and Public Involvement*

Patients and the public were not involved in identifying the research question or the design of the study. The results of the study will be disseminated to the public at the completion of the trial.

### *Study Site and Population*

The trial is being conducted in the 35-bed medical intensive care unit at Vanderbilt University Medical Center.

The inclusion criteria are:

1. Patient is located in a participating unit
2. Patient undergoing extubation from mechanical ventilation
3. Patient has been receiving mechanical ventilation for at least 12 hours
4. Age  $\geq$  18 years old

The exclusion criteria for the trial are:

1. Patient is receiving ventilation via a tracheostomy
2. Patient is being extubated to comfort measures or has "Do Not Reintubate" order in place at the time of extubation
3. Patient has required reintubation after a prior attempt at extubation during this hospitalization
4. Unplanned or self-extubation, where immediate reintubation is deemed necessary by the clinical team

1  
2  
3 The time of enrollment is considered to be the time of extubation. A patient flow  
4 diagram describing the number of patients screened for the trial (all patients who  
5 received invasive mechanical ventilation in the study unit), the number who did not meet  
6 inclusion criteria (e.g. died before extubation), and the number who were excluded, will  
7 be provided in the manuscript reporting the results of the trial (template of flow diagram  
8 is provided as supplementary Figure S1).  
9  
10  
11  
12  
13  
14  
15  
16  
17  
18

### 19 *Randomization and Treatment Allocation*

20  
21 The medical intensive care unit is divided into two geographic clusters (the front  
22 hallway and the back hallway), each of which is staffed by a respiratory therapist.  
23  
24 During each three-month block of the study, patients extubated in one cluster receive  
25 protocolized support delivered by one respiratory therapist while patients extubated in  
26 the other cluster receive usual care delivered by another respiratory therapist. All beds  
27 in the study unit care of patients of the same acuity, and patients are assigned to bed  
28 location based on availability without selection by patient characteristics. Patients  
29 admitted to the ICU remain in the same bed until death or ICU discharge. Among  
30 patients in the study ICU in the year prior to the trial who would have met criteria for  
31 enrollment, there was no difference in the incidence of reintubation in patients admitted  
32 to the beds in each of the two clusters. The assigned treatment group alternates every  
33 three months over the course of the trial so that each cluster will experience an equal  
34 number of months of protocolized support and usual care. A single randomization was  
35 performed which determined that the cluster associated with back hallway would  
36  
37  
38  
39  
40  
41  
42  
43  
44  
45  
46  
47  
48  
49  
50  
51  
52  
53  
54  
55  
56  
57  
58  
59  
60

1  
2  
3 receive protocolized support during the first block. The front hallway received usual  
4 care during the first block, and the blocks have alternated every three months (Fig. 2).  
5  
6

7  
8 The rationale for dividing the study unit into two clusters by geographic location  
9 of the beds was so that all patients assigned to a given respiratory therapist's cluster will  
10 receive the same treatment. A respiratory therapist caring for patients in the cluster  
11 assigned to protocolized support receives education on post-extubation respiratory  
12 support and structured feedback on his or her performance at the practice level.  
13  
14 Assigning some patients cared for by a respiratory therapist protocolized support and  
15 some patients to usual care was expected to introduce contamination because the  
16 respiratory therapist would be more likely to deliver post-extubation respiratory support  
17 to patients in their care assigned to the usual care arm. Given the nature of the  
18 intervention, patients, treating clinicians, and investigators are not blinded to group  
19 assignment.  
20  
21  
22  
23  
24  
25  
26  
27  
28  
29  
30  
31  
32  
33  
34

### 35 *Study Interventions*

#### 36 **Protocolized Support**

37  
38 Patients in the protocolized support group are assigned to receive post-  
39 extubation respiratory support starting at the time of extubation. The choice between  
40 non-invasive ventilation and high-flow nasal cannula is made using a standardized  
41 protocol for post-extubation respiratory support and is implemented by the patient's  
42 respiratory therapist (Fig. 3).  
43  
44  
45  
46  
47  
48  
49  
50

51 Based on the results of previous trials, the protocol for post-extubation  
52 respiratory support recommends NIV immediately upon extubation via a full facemask  
53  
54  
55  
56  
57



1  
2  
3 for all patients in the protocolized support group who have suspected hypercapnia  
4 [25,26] or are intubated for an acute exacerbation of COPD [40]. Because arterial blood  
5  
6 [25,26] or are intubated for an acute exacerbation of COPD [40]. Because arterial blood  
7  
8 gases are not routinely performed during spontaneous breathing trials in the study unit,  
9  
10 suspected hypercapnia is defined as known chronic hypercapnic respiratory failure,  
11  
12 known obesity hypoventilation syndrome, or an arterial blood gas with a partial pressure  
13  
14 of arterial carbon dioxide (PaCO<sub>2</sub>) >45 mmHg on a spontaneous breathing trial.  
15  
16 Recommended initial settings for NIV include initiation with an initial inspiratory positive  
17  
18 airway pressure of 14 cmH<sub>2</sub>O, an expiratory positive airway pressure of 8 cmH<sub>2</sub>O, and a  
19  
20 backup respiratory rate of 12 breaths per minute. Settings are titrated to maintain a  
21  
22 minute ventilation between 5.0 and 10.0 liters per minute and a respiratory rate below  
23  
24 30 breaths per minute, with a maximum inspiratory positive airway pressure of 20  
25  
26 cmH<sub>2</sub>O. Inspired fraction of oxygen is titrated to maintain an oxygen saturation > 90%  
27  
28 (Fig. S2). Removal of NIV for up to one hour at a time for patient comfort and to allow  
29  
30 patients to eat or drink is encouraged and administration of sedatives to increase patient  
31  
32 tolerance of NIV is discouraged (Figure 3). Device settings may be altered at the  
33  
34 discretion of the respiratory therapist or the clinical team.  
35  
36  
37  
38  
39

40 Given previous data suggesting that post-extubation support with HFNC may be  
41  
42 superior to conventional oxygen in low-risk patients [36] and equivalent to NIV in non-  
43  
44 hypercapnic high-risk patients [37], the protocol for post-extubation respiratory support  
45  
46 recommends HFNC for all patients in the protocolized support group who were not  
47  
48 intubated for an acute exacerbation of COPD and who do not have suspected  
49  
50 hypercapnia. Additionally, HFNC is recommended for patients who have a  
51  
52 contraindication to NIV (facial or cranial trauma or surgery, recent gastric or esophageal  
53  
54  
55  
56  
57  
58  
59  
60

1  
2  
3 surgery, inability to protect the airway, active emesis or upper gastrointestinal bleeding,  
4 excessive amount of respiratory secretions, or lack of cooperation). Patients who are  
5 extubated to NIV but are unable to tolerate it may be transitioned to HFNC.  
6  
7  
8  
9

10 For patients in the protocolized support group without suspected hypercapnia or  
11 a COPD exacerbation, HFNC is initiated immediately upon extubation. Recommended  
12 initial settings for HFNC and titration and weaning parameters include initial flow rates of  
13 at least 40 liters per minute, adjustment of flow rates in increments of 5 liters per minute,  
14 titration to patient comfort and a respiratory rate less than 30, a maximum flow rate of  
15 60 liters per minute, and titration of the fraction of inspired oxygen to maintain an arterial  
16 oxygen saturation > 90% (Fig. S3).  
17  
18  
19  
20  
21  
22  
23  
24  
25

26 Post-extubation respiratory support is provided from the time of extubation until  
27 5AM on the day following extubation. At 5AM on the day following extubation, a  
28 respiratory therapist assesses for readiness for weaning from post-extubation  
29 respiratory support. This timing was designed to allow patients to transfer out of the  
30 ICU on the day following extubation if clinically appropriate. Based on timing of  
31 extubation during the year preceding this trial, patients are expected to receive a  
32 median of 17 hours of respiratory support, and no less than five hours of respiratory  
33 support prior to being evaluated for weaning.  
34  
35  
36  
37  
38  
39  
40  
41  
42  
43

44 If the patient meets weaning criteria (Fig S2, S3) at the time of their assessment,  
45 the device is removed and the patient may be initiated on conventional oxygen therapy  
46 through a nasal cannula or face mask if needed. Post-extubation respiratory support  
47 with NIV or HFNC may be continued at the discretion of the treating clinicians, in which  
48 case subsequent titration and weaning is determined by the treating clinicians. Post-  
49  
50  
51  
52  
53  
54  
55  
56  
57  
58  
59  
60

1  
2  
3 extubation respiratory support may be discontinued prior to 5AM on the day following  
4  
5 extubation if the patient is transferred out of the ICU, the patient declines further post-  
6  
7 extubation respiratory support, or the treating clinicians determine that discontinuation is  
8  
9 needed for the optimal care of the patient.  
10

11  
12 The decision to use HFNC or NIV as rescue treatment for post-extubation  
13  
14 respiratory failure is made by treating clinicians and is prospectively recorded but is not  
15  
16 encouraged. For patients in the protocolized support group, treating clinicians may  
17  
18 decide to use invasive mechanical ventilation, NIV, HFNC, or conventional oxygen  
19  
20 therapy at any time, regardless of group assignment, if felt to be needed for the safe  
21  
22 care of the patient.  
23  
24  
25  
26  
27

## 28 **Usual Care**

29  
30 All aspects of post-extubation management for patients in the usual care arm are  
31  
32 determined by treating clinicians. Treating clinicians may elect to use NIV or HFNC as  
33  
34 post-extubation respiratory support for those patients they believe will benefit from these  
35  
36 therapies. No guidance is provided by the study regarding patient selection, device  
37  
38 selection, titration or weaning parameters, or timing of removal of support. In the study  
39  
40 ICU in the year prior to the trial, 8.3% of patients received post-extubation respiratory  
41  
42 support during routine clinical care; 7.1% received NIV and 1.2% received HFNC.  
43  
44  
45

46  
47 For patients in the usual care group, treating clinicians may decide to use  
48  
49 invasive mechanical ventilation, NIV, HFNC, or conventional oxygen therapy at any  
50  
51 time, regardless of group assignment, if felt to be needed for the optimal care of the  
52  
53 patient.  
54  
55  
56  
57

## Co-interventions

Study group assignment determines only the approach to post-extubation respiratory support. Treating clinicians determine all management prior to extubation, including the approach to sedation, timing of spontaneous breathing and awakening trials, and readiness for extubation. The study ICU has established clinical protocols for the care of patients receiving invasive mechanical ventilation including:

1. Critical Care Pain Observation Tool (CPOT score) [41]
2. Daily spontaneous awakening trial (SAT) safety screen, SAT performance, spontaneous breathing trial (SBT) safety screen, and SBT performance [2]
3. Richmond Agitation and Sedation Scale (RASS score) [42,43]
4. Choice of analgesia and sedation
5. Confusion Assessment Method for the ICU (CAM-ICU) [44,45]
6. Early Mobility [46]

The clinical protocols used in the study unit can be found in the supplementary appendix.

Following extubation, all clinical care decisions, other than use of NIV and HFNC for post-extubation respiratory support until 5AM the day following extubation, are made by treating clinicians, including use of diuretics, intravenous fluids, antibiotics, corticosteroids, airway clearance measures, and breathing treatments.

## Training

1  
2  
3 The protocols for initiation, titration, and weaning of NIV and HFNC were  
4 developed by consensus with local respiratory therapy leaders using best-practice  
5 recommendations from professional societies [3], protocols from prior randomized trials,  
6 and local protocols regarding the provision of non-invasive respiratory support. In  
7 addition to these materials, all respiratory therapists received a 30-minute lecture on the  
8 delivery of post-extubation respiratory support prior to caring for patients assigned to the  
9 protocolized support group. Ongoing education on post-extubation respiratory support  
10 is provided by study staff throughout the trial. Additional education was provided to the  
11 critical care fellows and attendings who cared for patients in the study units, in the form  
12 of a structured 60-minute lecture reviewing existing literature on post-extubation  
13 respiratory support and describing the rationale and protocol for the trial.  
14  
15  
16  
17  
18  
19  
20  
21  
22  
23  
24  
25  
26  
27  
28  
29  
30

### 31 **Data Collection**

32  
33 Data are prospectively collected from the electronic health record by trained  
34 study personnel. Data are stored in a secure, online database [47]. Collected data  
35 include:  
36  
37  
38  
39

40 Characteristics: Age; gender; height; weight; body mass index; race; chronic  
41 comorbidities; indication for intubation; APACHE II score at ICU admission  
42  
43

44 Baseline (i.e. time of extubation): APACHE II score; length of mechanical  
45 ventilation; last known left ventricular ejection fraction; active medical problems;  
46 failure of more than one spontaneous breathing trial; last known Glasgow Coma  
47 Score [48]; last known Richmond Agitation and Sedation Score [42]; last known  
48 CAM-ICU score [44]; highest FiO<sub>2</sub> delivered in the 6 hours prior to extubation;  
49  
50  
51  
52  
53  
54  
55  
56  
57  
58  
59  
60

1  
2  
3 lowest oxygen saturation during a spontaneous breathing trial; highest  
4  
5 respiratory rate in the 6 hours prior to extubation; highest respiratory rate during  
6  
7 a spontaneous breathing trial; highest heart rate in the 6 hours prior to  
8  
9 extubation; highest heart rate during a spontaneous breathing trial; use of  
10  
11 vasopressors in the 6 hours prior to extubation; results of any arterial blood gas  
12  
13 obtained during a spontaneous breathing trial.  
14  
15

16  
17 Data from 0 to 96 hours: The need for reintubation within 96 hours; time to  
18  
19 reintubation; indication for reintubation; presence of laryngeal edema requiring  
20  
21 reintubation; amount of time spent receiving HFNC and NIV in the first 24 hours  
22  
23 post-extubation; the amount of time spent receiving prophylactic post-extubation  
24  
25 respiratory support from 0-96 hours post-extubation; the highest and lowest  
26  
27 levels of respiratory support (flow rate; FiO<sub>2</sub>; IPAP; EPAP) at three time points  
28  
29 (0-6, 6-12, and 12-24 hours post-extubation); the highest and lowest respiratory  
30  
31 rate, heart rate, SaO<sub>2</sub>; and FiO<sub>2</sub> at three timepoints (0-6, 6-12, and 12-24 hours  
32  
33 post-extubation); the presence of delirium at any timepoint from 0-96 hours post-  
34  
35 extubation (as determined by CAM-ICU score).  
36  
37

38  
39  
40 Clinical Outcomes: Reintubation between baseline and the first of either hospital  
41  
42 discharge or 28-days; in-hospital mortality; time to death; ICU-free days and  
43  
44 ventilator-free days in the 28 days after enrollment.  
45  
46  
47  
48

49 *Primary Outcome*  
50  
51  
52  
53  
54  
55  
56  
57

1  
2  
3 The primary outcome is reintubation in the 96 hours following enrollment.  
4

5 Reintubation is defined as placement of an endotracheal tube or tracheostomy tube in  
6 the trachea for any reason.  
7  
8

9  
10 Death may be a competing event for the outcome of reintubation. Among the  
11 patients who would have met criteria for enrollment in the year prior to the trial, every  
12 patient who died within 96 hours of extubation experienced reintubation prior to death.  
13  
14 In the event that any patient in the trial dies in the 96 hours following enrollment without  
15 experiencing reintubation, they will be classified in the primary analysis as having met  
16 the primary outcome. Patients who are discharged from the hospital before 96 hours  
17 following enrollment without having experienced reintubation will be classified as not  
18 meeting the primary outcome.  
19  
20  
21  
22  
23  
24  
25  
26  
27

28 Any decision to reintubate will be made by the clinical team. Prior studies have  
29 attempted to protocolize the decision to reintubate [34,36,37]. Because the goal of the  
30 PROPER study is to evaluate the performance of protocolized support when applied to  
31 a broad population of critically ill adults in “real-world” practice, we deliberately deferred  
32 all decisions regarding management of post-extubation respiratory failure and  
33 reintubation to the clinical team with no involvement or guidance from the research  
34 team.  
35  
36  
37  
38  
39  
40  
41  
42  
43  
44  
45  
46

### 47 *Secondary Outcome*

48

49 The single, pre-specified, secondary outcome is the number of ICU-free days in  
50 the 28 days following enrollment. This is defined as the number of whole calendar days  
51 alive and not admitted to an intensive care unit beginning at midnight on the day of  
52  
53  
54  
55  
56  
57

1  
2  
3 extubation to 28 days following enrollment. Patients who are never discharged from the  
4  
5 intensive care unit will receive a value of 0. Patients who die before day 28 will receive  
6  
7 a value of 0. For patients who return to an ICU and are subsequently discharged prior  
8  
9 to day 28, ICU-free days will be counted as the number of whole calendar days from  
10  
11 midnight on the day following the final ICU discharge to 28 days following enrollment.  
12  
13  
14 All data collection will be censored at the first of hospital discharge or 28 days.  
15  
16  
17  
18

### 19 *Exploratory Outcomes*

- 21 • All-cause in-hospital mortality
- 22
- 23 • Ventilator-free days in the 28 days following enrollment (defined in the online
- 24 supplement)
- 25
- 26 • Time from enrollment to reintubation
- 27
- 28 • Indication for reintubation (respiratory indication, laryngeal edema, other)
- 29
- 30 • Delirium in the 96 hours following enrollment
- 31
- 32 • Lowest SpO<sub>2</sub>/FiO<sub>2</sub> ratio in the 24 hours following enrollment
- 33
- 34 • Highest respiratory rate in the 0-6 hours, 6-12 hours, and 12-24 hours following
- 35 enrollment
- 36
- 37
- 38
- 39
- 40
- 41
- 42
- 43
- 44

## 45 **Statistical Analysis and Reporting**

### 46 *Sample Size Estimation*

47  
48  
49 Among patients in the study ICU in the year prior to the trial who would have met  
50  
51 criteria for enrollment [49], the incidence of reintubation within 96 hours after extubation  
52  
53 was 12.1%. Similar rates have been reported in previous observational studies of  
54  
55  
56  
57



1  
2  
3 extubation in the ICU [6,7]. Prior randomized trials have reported that prophylactic post-  
4  
5 extubation respiratory support with NIV may reduce the relative risk of reintubation by  
6  
7 49% to 66% in high risk patients [5,25], while post-extubation respiratory support with  
8  
9 HFNC may reduce the relative risk of reintubation by 81% in high risk patients and 60%  
10  
11 in low risk patients [35–37]. Based on the results of these prior randomized trials, we  
12  
13 estimated that protocolized support would reduce the relative risk of reintubation by at  
14  
15 least 55%. This is equivalent to an absolute risk reduction of 6.7%, from 12.1% in the  
16  
17 usual care group to 5.4% in the protocolized support group.  
18  
19  
20  
21

22 Among patients in the study ICU in the year prior to the trial who would have met  
23  
24 criteria for enrollment, the intra-cluster correlation, intra-period correlation, and intra-  
25  
26 cluster intra-period correlation for the primary outcome were all  $<0.001$  assuming a  
27  
28 cluster-crossover design with two clusters and three-month periods. Using PS version  
29  
30 3.1.2 with the above assumptions and a chi-squared test of the primary hypothesis with  
31  
32 an alpha level of 0.05, we calculated that enrolling 566 patients (283 per group) would  
33  
34 achieve at least 80% statistical power. Among patients in the study ICU in the year  
35  
36 prior to the trial who would have met criteria for enrollment, 8.3% received post-  
37  
38 extubation respiratory support during usual care. In order to account for loss of  
39  
40 statistical power due to use of post-extubation respiratory support in the usual care  
41  
42 group during the trial, we increased our sample size estimate by 10% to 623 patients.  
43  
44  
45 Based on data from the study ICU in the year prior to the trial, we anticipated that  
46  
47 enrollment of at least 630 patients would require a study duration of 18 months.  
48  
49  
50  
51  
52  
53

#### 54 *Data and Safety Monitoring Board and Interim Analysis*

55  
56  
57

1  
2  
3 For this 18-month, single-center study comparing a minimal risk intervention with  
4 usual care, a data and safety monitoring board was not appointed and an interim  
5 analysis is not planned.  
6  
7  
8  
9

### 10 11 12 *Statistical Analysis Principles* 13

14 All analyses will be conducted at the level of the individual patient during an  
15 individual hospitalization on an intent-to-treat fashion, unless otherwise specified.  
16  
17 Continuous variables will be reported as median and IQR; categorical variables will be  
18 reported as frequencies and proportions. Given the cluster cross-over design, all  
19 comparisons between the protocolized post-extubation respiratory support group and  
20 the usual care group will take into account the cluster and period level correlations. With  
21 only one primary outcome and one secondary outcome, a two-sided p-value of 0.05 will  
22 be considered statistically significant.  
23  
24  
25  
26  
27  
28  
29  
30  
31  
32  
33  
34

### 35 *Comparison of primary outcome between groups* 36

37 We will compare the binary primary outcome of reintubation within 96 hours  
38 between the protocolized support group and the usual care group. It is possible to  
39 estimate a marginal effect, which is interpreted as the population effect of implementing  
40 a general policy of post intubation ventilatory support, or a conditional effect, which is  
41 interpreted as the effect on an individual patient given the values of the covariates for  
42 that patient [50]. Since our intervention may be applied at both the unit level as a  
43 general policy, or at the patient level as an individual intervention, both may be of  
44 interest. We will use a generalized estimating equation (GEE) approach to estimate the  
45  
46  
47  
48  
49  
50  
51  
52  
53  
54  
55  
56  
57  
58  
59  
60

1  
2  
3 marginal effect, and we will use a generalized linear mixed model with logit link function  
4  
5 to estimate the conditional effect. Group assignment will be a fixed effect, and cluster  
6  
7 and period will be included as random effects [51,52]. We will report both adjusted and  
8  
9 unadjusted comparisons; for the purposes of declaring success on the primary  
10  
11 endpoint, we will consider the unadjusted marginal effect.  
12  
13

14  
15 Adjusted comparisons will include age, APACHE II score, duration of invasive  
16  
17 mechanical ventilation, indication for intubation, chronic hypercapnia, chronic pulmonary  
18  
19 disease, and respiratory rate on a spontaneous breathing trial. To account for non-linear  
20  
21 relationships, continuous variables will be analyzed using restricted cubic splines with  
22  
23 between 3 and 5 knots. Forest plots will be used to graphically display the adjusted  
24  
25 analyses, and locally weighted regression or partial effects plots will be used to portray  
26  
27 the association between continuous covariates and the outcome.  
28  
29  
30  
31  
32

### 33 *Comparison of secondary outcome between groups*

34

35  
36 The secondary outcome is the number of ICU-free days in the 28 days following  
37  
38 enrollment. We will use a proportional odds model to compare this outcome between  
39  
40 groups. As with analysis of the primary outcome, a generalized estimating equation  
41  
42 approach will be used to estimate marginal effects and generalized linear model  
43  
44 approach will be used to estimate conditional effects, and both unadjusted and adjusted  
45  
46 comparisons will be reported. Adjustment will include age, APACHE II score, duration of  
47  
48 invasive mechanical ventilation, indication for intubation, chronic hypercapnia, chronic  
49  
50 pulmonary disease, and respiratory rate on a spontaneous breathing trial.  
51  
52  
53  
54  
55  
56  
57  
58  
59  
60

### *Sensitivity analyses*

To assess the impact of design considerations on the outcomes, we will conduct several sensitivity analyses. First, we assumed all patients who died within 96 hours to have required reintubation. We will repeat the analysis of the primary and secondary outcome classifying patients who died within 96 hours without experiencing reintubation as not meeting the primary outcome. Second, we have included all patients who are extubated, regardless of reason. We will repeat the analysis of the primary and secondary outcome excluding patients with an unexpected extubation, such as self-extubation. Finally, it is possible that some patients received less than 5 hours of post-extubation respiratory support due to, for example, a protocol error or patient intolerance. We will conduct a modified intent to treat analysis of the primary and secondary outcomes that excludes these patients.

### *Exploratory Analyses*

**Time to reintubation.** In our design, we selected a 96-hour window as being appropriate for capturing re-intubation that might reasonably be associated with the post-extubation respiratory support. Different rates may have been observed if different time windows had been used. To evaluate the relative risk of reintubation over time, we will construct a proportional hazards model. This will also allow us to account for the competing risk of death.

**Effect Modification (Subgroup Analyses).** We will test for effect modification on the primary outcome by evaluating the interaction between group assignment and

1  
2  
3 pre-specified subgroups. Any interaction term with a p-value less than 0.1 will putatively  
4 identify an effect modifier. Subgroup analyses may proceed within levels of a modifying  
5 variable. Pre-specified subgroups include:  
6  
7  
8

- 9  
10 1. Number of risk factors for reintubation, as defined by Hernandez et  
11 al. [37]:  
12  
13
  - 14 • Age > 65 years
  - 15 • Heart failure as the primary indication for mechanical  
16 ventilation
  - 17 • Moderate to severe COPD
  - 18 • APACHE II score at extubation > 12
  - 19 • Body mass index > 30 kg/m<sup>2</sup>
  - 20 • Failure of one or more spontaneous breathing trials
  - 21 • Duration of invasive mechanical ventilation greater than 7  
22 days

23  
24  
25  
26  
27  
28  
29  
30  
31  
32  
33  
34  
35  
36 2. Chronic hypercapnia or mechanical ventilation for COPD  
37 exacerbation  
38  
39  
40 3. Time of extubation (the effect of “dose” of therapy received will be  
41 evaluated using this baseline variable anticipated to correlate with  
42 the duration of post-extubation support, as patients are evaluated  
43 for removal from protocolized support at 5AM on the day following  
44 extubation)  
45  
46  
47  
48  
49  
50  
51  
52 4. Primary indication for mechanical ventilation:  
53
  - 54 • Hypoxemic respiratory failure

55  
56  
57  
58  
59  
60

- 1
  - 2
  - 3
  - 4
  - 5
  - 6
  - 7
  - 8
  - 9
  - 10
  - 11
  - 12
  - 13
  - 14
  - 15
  - 16
  - 17
  - 18
  - 19
  - 20
  - 21
  - 22
  - 23
  - 24
  - 25
  - 26
  - 27
  - 28
  - 29
  - 30
  - 31
  - 32
  - 33
  - 34
  - 35
  - 36
  - 37
  - 38
  - 39
  - 40
  - 41
  - 42
  - 43
  - 44
  - 45
  - 46
  - 47
  - 48
  - 49
  - 50
  - 51
  - 52
  - 53
  - 54
  - 55
  - 56
  - 57
  - 58
  - 59
  - 60
- Hypercapnic respiratory failure
  - Altered mental status
  - To facilitate a procedure
  - Other
5. Duration of invasive mechanical ventilation prior to enrollment
  6. Chronic pulmonary disease, defined as any of:
    - COPD, interstitial lung disease, asthma, cystic fibrosis, non-cystic fibrosis bronchiectasis, recurrent aspiration, pulmonary sarcoidosis, obstructive sleep apnea, obesity hypoventilation syndrome, pulmonary malignancy, pulmonary hypertension, chronic respiratory infection, or restrictive lung disease due to neuromuscular weakness
  7. APACHE II score at extubation
  8. Respiratory rate during a spontaneous breathing trial prior to extubation
  9. Failure of more than one spontaneous breathing trial
  10. Body mass index

### *Corrections for multiple testing*

We have pre-specified a single primary outcome and a single secondary outcome. Consistent with recommendations of the Food and Drug Administration [53] and the European Medicines Association [54], each will be tested using a two-sided p-value with a significance level of 0.05. For all other analyses, emphasis will be placed

1  
2  
3 on the estimate of effect size with 95% confidence intervals, as recommended by the  
4  
5 *International Committee of Medical Journal Editors* [55], and no corrections for multiple  
6  
7 comparisons will be performed.  
8  
9

### 10 11 12 *Handling of missing data* 13

14  
15 The primary outcome, reintubation within 96 hours, is not anticipated to be  
16  
17 missing for any patients. If ventilator status throughout the 96 hours is unavailable,  
18  
19 which may occur if the patient is discharged home or transferred to a skilled nursing  
20  
21 facility, we will use last known status carried forward. Missing data will not be imputed  
22  
23 for the primary outcome, or any of the analyses of secondary or exploratory outcomes.  
24  
25 In adjusted analyses, missing data for covariates will be imputed using multiple  
26  
27 imputations. We expect that age, APACHE II score, duration of invasive mechanical  
28  
29 ventilation, indication for intubation, chronic hypercapnia, and chronic pulmonary  
30  
31 disease will not be missing in any patients. Respiratory rate during the spontaneous  
32  
33 breathing trial may not be available in all patients, particularly those who undergo  
34  
35 unexpected extubations.  
36  
37  
38  
39  
40  
41  
42

### 43 *Trial Status* 44

45  
46 PROPER is an ongoing pragmatic trial comparing protocolized respiratory  
47  
48 support to usual care following the extubation of critically ill adults. Patient enrollment  
49  
50 began on October 1, 2017 and will complete on March 31, 2019.  
51  
52

### 53 **Ethics and dissemination** 54 55 56 57

### *IRB Approval*

The trial was approved by the Institutional Review Board (IRB) of Vanderbilt University Medical Center with a waiver of informed consent (IRB# 170650).

### *Consent*

There are no known randomized trials or evidence-based guidelines that advocate for or against the use of protocolized support for all critically ill adults undergoing extubation in a medical intensive care unit. This study was submitted to the IRB as meeting the criteria for minimal risk because:

- (1) Respiratory support was used *ad hoc* in the clinical care of patients undergoing extubation in the participating ICU prior to initiating the research.
- (2) There are no data asserting the superiority or inferiority of protocolized respiratory support for all patients compared with usual care.
- (3) If needed for the optimal care of a patient, treating clinicians can administer NIV, HFNC, or conventional oxygen therapy to any patient, at any time, regardless of group assignment.
- (4) All other activities of the research are limited to collection of data from the medical record with no other participant interaction.

In addition to the criteria for minimal risk, the conduct of the study was thought to be impracticable without an alteration or waiver of informed consent. Obtaining prospective, informed consent from all patients being extubated by each respiratory therapist in each cluster would not be feasible, and would risk systematically excluding



1  
2  
3 patients experiencing urgent or unplanned extubation. Excluding such patients would  
4  
5 introduce bias and limit generalizability by neglecting a group at high risk of reintubation.  
6  
7

8  
9  
10 *Publication*

11  
12 The results of the trial will be submitted for publication in a peer-reviewed journal  
13  
14 and presented at one or more scientific conferences.  
15  
16

17  
18 **DISCUSSION**

19  
20  
21 Upon completion, PROPER will provide the most comprehensive data to date on  
22  
23 the effect of protocolized post-extubation respiratory support on reintubation in an  
24  
25 unselected medical ICU population. Previous trials have suggested that patients with  
26  
27 hypercapnia [24,25], non-hypercapnic patients at high risk of reintubation [3,5,24], and  
28  
29 non-hypercapnic patients at low risk of reintubation [36] could all potentially benefit from  
30  
31 post-extubation respiratory support. The protocolized provision of respiratory support to  
32  
33 a broad population of ICU patients encompassing each of these previously-examined  
34  
35 subgroups in a randomized, controlled trial has yet to be reported.  
36  
37

38  
39 If our results demonstrate that protocolized respiratory support reduces the rate of  
40  
41 reintubation, this would provide compelling evidence that nearly all patients undergoing  
42  
43 extubation in a medical intensive care unit should receive respiratory support in the form  
44  
45 of either NIV or HFNC at the time of extubation. Conversely, if we demonstrate that  
46  
47 protocolized respiratory support does not reduce the rate of reintubation overall, this  
48  
49 would allow providers to avoid unnecessarily expending the resources required to  
50  
51 provide post-extubation respiratory support to nearly all patients undergoing extubation.  
52  
53 Instead, resources might be targeted to those patient subgroups for whom benefit has  
54  
55  
56

1  
2  
3 been previously noted, or for whom benefit is noted in our subgroup analyses. The  
4 results may also guide future research toward identifying patients at highest risk of  
5 reintubation and those most likely to benefit from respiratory support.  
6  
7  
8  
9

10 Previous trials have provided 24 to 48 hours of support [5,25,26,36,37]. We  
11 elected a lower minimum duration because this support can only be provided in an ICU  
12 setting at many centers, and in a population with a low baseline reintubation rate the  
13 intervention could potentially lead to longer ICU lengths of stay than necessary. The  
14 design of the PROPER trial specifies the provision of post-extubation respiratory  
15 support from extubation until at least 5AM the following day, at which point the patient's  
16 readiness to wean from post-extubation respiratory support is assessed. This strategy  
17 involves a minimum of 5 hours of respiratory support, and our preliminary data suggest  
18 a median of 17 hours of support. While shorter than other studies, our approach allows  
19 removal of support and transfer from the ICU on the day following extubation, if clinically  
20 appropriate, or continuation of respiratory support when clinically indicated.  
21  
22  
23  
24  
25  
26  
27  
28  
29  
30  
31  
32  
33  
34

35 The primary outcome is reintubation, defined as placement of an endotracheal  
36 tube or tracheostomy tube in the trachea for any reason, in the 96 hours following  
37 enrollment. Previous studies have evaluated reintubation over a broad range of time  
38 intervals, from 48 hours [36,37,56] to 7 days [57] and longer [5]. Longer time intervals  
39 capture more events but increase the risk that the reintubation is unrelated to the  
40 original illness and respiratory function in the immediate post-extubation period.  
41  
42  
43  
44  
45  
46  
47  
48  
49 Intubation within 96 hours of extubation was chosen as the primary outcome based on a  
50 large observational study assessing time to reintubation in 96,367 adults who received  
51 ventilation in an intensive care unit in the United States. That study proposed 96 hours  
52  
53  
54  
55  
56  
57  
58  
59  
60

1  
2  
3 as the optimal time point at which to assess reintubation [8]. While justifiable, selection  
4  
5 of a binary endpoint occurring within a defined time window might miss evidence for  
6  
7 benefit, and so we have prespecified a survival analysis that considers time to  
8  
9 reintubation.  
10

11  
12 In our design, we have made choices to bias towards the null. This means there  
13  
14 are several threats to observing a difference between study groups. Foremost, the  
15  
16 anticipated median duration of post-extubation respiratory support of 17 hours is shorter  
17  
18 than the 24-48 hours delivered in some prior trials. Some patients may be intolerant of  
19  
20 post-extubation respiratory support, which may further limit the average exposure to the  
21  
22 study interventions. It is also possible that the use of post-extubation respiratory  
23  
24 support in the usual care group may be higher during the study period than prior to the  
25  
26 trial due to increasing provider familiarity with post-extubation respiratory support,  
27  
28 contamination from the unblinded intervention being delivered in the same study  
29  
30 location, or both. The provision of post-extubation support provided in the usual care  
31  
32 group of this single center trial may not match the experience at other centers so we will  
33  
34 provide data on the use of NIV and HFNC in the usual care arm of PROPER to assist in  
35  
36 the interpretation of the results. Another potential possibility is that use of one therapy  
37  
38 will be similar between the intervention and usual care groups (e.g., use of NIV) with  
39  
40 substantial separation between groups in the other therapy (e.g., use of HFNC). This  
41  
42 would require a more nuanced interpretation of the study findings. Treating clinicians  
43  
44 are aware of study group assignment and so clinicians may alter the timing of  
45  
46 extubation or management of post-extubation respiratory failure based on group  
47  
48 assignment. To assess for such bias, we will present characteristics of the two study  
49  
50  
51  
52  
53  
54  
55  
56  
57  
58  
59  
60

1  
2  
3 groups at extubation, including duration of mechanical ventilation prior to extubation,  
4  
5 and information about use of rescue respiratory support in the two groups. We will also  
6  
7 perform analyses that adjust for these factors or conduct prespecified sensitivity  
8  
9 analyses. Finally, group assignment at the level of the cluster with multiple cluster-level  
10  
11 crossovers introduces the possibility for intracluster correlation, intraperiod correlation,  
12  
13 and intracluster intraperiod correlation, which may confound the relationship between  
14  
15 group assignment and outcome. In the PROPER trial, the two clusters are anticipated  
16  
17 to be extremely similar, as they are two halves of a single ICU. The periods are  
18  
19 relatively short and each cluster alternates between group assignment relatively  
20  
21 frequently. Among patients in the study ICU in the year prior to the trial who would have  
22  
23 met criteria for enrollment, we measured these correlations and found the effect of  
24  
25 intracluster correlation, intraperiod correlation, and intracluster intraperiod correlation to  
26  
27 be negligible (see Supplemental methods).  
28  
29  
30  
31  
32  
33  
34

## 35 **CONCLUSION**

36  
37 We describe, before the conclusion of enrollment or data un-blinding, our trial  
38  
39 design and our approach to analyzing the data from a large, pragmatic, cluster-  
40  
41 crossover trial comparing the rate of reintubation between patients receiving  
42  
43 protocolized post-extubation respiratory support and those patients receiving usual  
44  
45 care. Disseminating this pre-specified framework enhances the rigor and reproducibility  
46  
47 of our final report, and will allow readers to better judge the impact of our findings.  
48  
49  
50  
51  
52  
53  
54  
55  
56  
57

## REFERENCES

- 1 Wunsch H, Wagner J, Herlim M, *et al.* ICU occupancy and mechanical ventilator use in the United States. *Crit Care Med* 2013;**41**:2712–9. doi:10.1097/CCM.0b013e318298a139
- 2 Girard TD, Kress JP, Fuchs BD, *et al.* Efficacy and safety of a paired sedation and ventilator weaning protocol for mechanically ventilated patients in intensive care (Awakening and Breathing Controlled trial): a randomised controlled trial. *Lancet Lond Engl* 2008;**371**:126–34. doi:10.1016/S0140-6736(08)60105-1
- 3 Ouellette DR, Patel S, Girard TD, *et al.* Liberation from Mechanical Ventilation: An Official American College of Chest Physicians/American Thoracic Society Clinical Practice Guideline: Inspiratory Pressure Augmentation during Spontaneous Breathing Trials, Protocols Minimizing Sedation, and Non-invasive Ventilation Immediately After Extubation. *Chest* Published Online First: 3 November 2016. doi:10.1016/j.chest.2016.10.036
- 4 Thille AW, Boissier F, Ben-Ghezala H, *et al.* Easily identified at-risk patients for extubation failure may benefit from noninvasive ventilation: a prospective before-after study. *Crit Care Lond Engl* 2016;**20**:48. doi:10.1186/s13054-016-1228-2
- 5 Nava S, Gregoretti C, Fanfulla F, *et al.* Noninvasive ventilation to prevent respiratory failure after extubation in high-risk patients. *Crit Care Med* 2005;**33**:2465–70.
- 6 Thille AW, Richard J-CM, Brochard L. The Decision to Extubate in the Intensive Care Unit. *Am J Respir Crit Care Med* 2013;**187**:1294–302. doi:10.1164/rccm.201208-1523CI
- 7 Thille AW, Harrois A, Schortgen F, *et al.* Outcomes of extubation failure in medical intensive care unit patients. *Crit Care Med* 2011;**39**:2612–8. doi:10.1097/CCM.0b013e3182282a5a
- 8 Miltiades AN, Gershengorn HB, Hua M, *et al.* Cumulative Probability and Time to Reintubation in United States Intensive Care Units. *Crit Care Med* 2017;**45**:835–42. doi:10.1097/CCM.0000000000002327
- 9 Torres A, Gatell JM, Aznar E, *et al.* Re-intubation increases the risk of nosocomial pneumonia in patients needing mechanical ventilation. *Am J Respir Crit Care Med* 1995;**152**:137–41. doi:10.1164/ajrccm.152.1.7599812
- 10 Frutos-Vivar F, Esteban A, Apezteguia C, *et al.* Outcome of reintubated patients after scheduled extubation. *J Crit Care* 2011;**26**:502–9. doi:10.1016/j.jcrc.2010.12.015
- 11 Sellares J, Ferrer M, Cano E, *et al.* Predictors of prolonged weaning and survival during ventilator weaning in a respiratory ICU. *Intensive Care Med* 2011;**37**:775–84. doi:10.1007/s00134-011-2179-3
- 12 Esteban A, Anzueto A, Frutos F, *et al.* Characteristics and Outcomes in Adult Patients Receiving Mechanical Ventilation: A 28-Day International Study. *JAMA* 2002;**287**:345–55. doi:10.1001/jama.287.3.345
- 13 Esteban A, Ferguson ND, Meade MO, *et al.* Evolution of Mechanical Ventilation in Response to Clinical Research. *Am J Respir Crit Care Med* 2008;**177**:170–7. doi:10.1164/rccm.200706-893OC

- 14 Esteban A, Frutos-Vivar F, Muriel A, *et al.* Evolution of Mortality over Time in Patients Receiving Mechanical Ventilation. *Am J Respir Crit Care Med* 2013;**188**:220–30. doi:10.1164/rccm.201212-2169OC
- 15 Brochard L, Mancebo J, Wysocki M, *et al.* Noninvasive ventilation for acute exacerbations of chronic obstructive pulmonary disease. *N Engl J Med* 1995;**333**:817–22. doi:10.1056/NEJM199509283331301
- 16 Masip J, Roque M, Sánchez B, *et al.* Noninvasive ventilation in acute cardiogenic pulmonary edema: systematic review and meta-analysis. *JAMA* 2005;**294**:3124–30. doi:10.1001/jama.294.24.3124
- 17 Baillard C, Fosse J-P, Sebbane M, *et al.* Noninvasive Ventilation Improves Preoxygenation before Intubation of Hypoxic Patients. *Am J Respir Crit Care Med* 2006;**174**:171–7. doi:10.1164/rccm.200509-1507OC
- 18 Nava S. Noninvasive Mechanical Ventilation in the Weaning of Patients with Respiratory Failure Due to Chronic Obstructive Pulmonary Disease: A Randomized, Controlled Trial. *Ann Intern Med* 1998;**128**:721. doi:10.7326/0003-4819-128-9-199805010-00004
- 19 Vaschetto R, Longhini F, Persona P, *et al.* Early extubation followed by immediate noninvasive ventilation vs. standard extubation in hypoxemic patients: a randomized clinical trial. *Intensive Care Med* 2019;**45**:62–71. doi:10.1007/s00134-018-5478-0
- 20 Yeung J, Couper K, Ryan EG, *et al.* Non-invasive ventilation as a strategy for weaning from invasive mechanical ventilation: a systematic review and Bayesian meta-analysis. *Intensive Care Med* 2018;**44**:2192–204. doi:10.1007/s00134-018-5434-z
- 21 Esteban A, Frutos-Vivar F, Ferguson ND, *et al.* Noninvasive Positive-Pressure Ventilation for Respiratory Failure after Extubation. *N Engl J Med* 2004;**350**:2452–60. doi:10.1056/NEJMoa032736
- 22 Keenan SP, Powers C, McCormack DG, *et al.* Noninvasive Positive-Pressure Ventilation for Postextubation Respiratory Distress: A Randomized Controlled Trial. *JAMA* 2002;**287**:3238–44. doi:10.1001/jama.287.24.3238
- 23 Su C-L, Chiang L-L, Yang S-H, *et al.* Preventive use of noninvasive ventilation after extubation: a prospective, multicenter randomized controlled trial. *Respir Care* 2012;**57**:204–10. doi:10.4187/respcare.01141
- 24 Jiang J-S, Kao S-J, Wang S-N. Effect of early application of biphasic positive airway pressure on the outcome of extubation in ventilator weaning. *Respirology* 1999;**4**:161–5. doi:10.1046/j.1440-1843.1999.00168.x
- 25 Ferrer M, Valencia M, Nicolas JM, *et al.* Early noninvasive ventilation averts extubation failure in patients at risk: a randomized trial. *Am J Respir Crit Care Med* 2006;**173**:164–70. doi:10.1164/rccm.200505-718OC
- 26 Ferrer M, Sellarés J, Valencia M, *et al.* Non-invasive ventilation after extubation in hypercapnic patients with chronic respiratory disorders: randomised controlled trial. *The Lancet* 2009;**374**:1082–8. doi:10.1016/S0140-6736(09)61038-2

- 1  
2  
3 27 Parke RL, McGuinness SP. Pressures delivered by nasal high flow oxygen during all phases of the  
4 respiratory cycle. *Respir Care* 2013;**58**:1621–4. doi:10.4187/respcare.02358  
5  
6 28 Riera J, Pérez P, Cortés J, *et al.* Effect of high-flow nasal cannula and body position on end-expiratory  
7 lung volume: a cohort study using electrical impedance tomography. *Respir Care* 2013;**58**:589–96.  
8 doi:10.4187/respcare.02086  
9  
10 29 Lee JH, Rehder KJ, Williford L, *et al.* Use of high flow nasal cannula in critically ill infants, children,  
11 and adults: a critical review of the literature. *Intensive Care Med* 2013;**39**:247–57.  
12 doi:10.1007/s00134-012-2743-5  
13  
14 30 Roca O, Riera J, Torres F, *et al.* High-flow oxygen therapy in acute respiratory failure. *Respir Care*  
15 2010;**55**:408–13.  
16  
17 31 Mauri T, Turrini C, Eronia N, *et al.* Physiologic Effects of High-flow Nasal Cannula in Acute Hypoxemic  
18 Respiratory Failure. *Am J Respir Crit Care Med* Published Online First: 20 December 2016.  
19 doi:10.1164/rccm.201605-0916OC  
20  
21 32 Cortegiani A, Accurso G, Mercadante S, *et al.* High flow nasal therapy in perioperative medicine:  
22 from operating room to general ward. *BMC Anesthesiol* 2018;**18**:166. doi:10.1186/s12871-018-  
23 0623-4  
24  
25 33 Spoletini G, Cortegiani A, Gregoretti C. Physiopathological rationale of using high-flow nasal therapy  
26 in the acute and chronic setting: A narrative review. *Trends Anaesth Crit Care* Published Online First:  
27 21 February 2019. doi:10.1016/j.tacc.2019.02.001  
28  
29 34 Frat J-P, Thille AW, Mercat A, *et al.* High-flow oxygen through nasal cannula in acute hypoxemic  
30 respiratory failure. *N Engl J Med* 2015;**372**:2185–96. doi:10.1056/NEJMoa1503326  
31  
32 35 Maggiore SM, Idone FA, Vaschetto R, *et al.* Nasal high-flow versus Venturi mask oxygen therapy  
33 after extubation. Effects on oxygenation, comfort, and clinical outcome. *Am J Respir Crit Care Med*  
34 2014;**190**:282–8. doi:10.1164/rccm.201402-0364OC  
35  
36 36 Hernández G, Vaquero C, González P, *et al.* Effect of postextubation high-flow nasal cannula vs  
37 conventional oxygen therapy on reintubation in low-risk patients: A randomized clinical trial. *JAMA*  
38 2016;**315**:1354–61. doi:10.1001/jama.2016.2711  
39  
40 37 Hernández G, Vaquero C, Colinas L, *et al.* Effect of Postextubation High-Flow Nasal Cannula vs  
41 Noninvasive Ventilation on Reintubation and Postextubation Respiratory Failure in High-Risk  
42 Patients: A Randomized Clinical Trial. *JAMA* 2016;**316**:1565–74. doi:10.1001/jama.2016.14194  
43  
44 38 SPIRIT 2013 explanation and elaboration: guidance for protocols of clinical trials. - PubMed - NCBI.  
45 <https://www.ncbi.nlm.nih.gov/pubmed/23303884> (accessed 8 Jan 2018).  
46  
47 39 Ware JH, Hamel MB. Pragmatic Trials — Guides to Better Patient Care? *N Engl J Med*  
48 2011;**364**:1685–7. doi:10.1056/NEJMp1103502  
49  
50  
51  
52  
53  
54  
55  
56  
57  
58  
59  
60



- 1  
2  
3 40 Khilnani GC, Galle AD, Hadda V, *et al.* Non-invasive ventilation after extubation in patients with  
4 chronic obstructive airways disease: a randomised controlled trial. *Anaesth Intensive Care*  
5 2011;**39**:217–23.  
6  
7 41 Kanji S, MacPhee H, Singh A, *et al.* Validation of the Critical Care Pain Observation Tool in Critically Ill  
8 Patients With Delirium: A Prospective Cohort Study. *Crit Care Med* 2016;**44**:943–7.  
9 doi:10.1097/CCM.0000000000001522  
10  
11 42 Sessler CN, Gosnell MS, Grap MJ, *et al.* The Richmond Agitation–Sedation Scale. *Am J Respir Crit*  
12 *Care Med* 2002;**166**:1338–44. doi:10.1164/rccm.2107138  
13  
14 43 Ely EW, Truman B, Shintani A, *et al.* Monitoring sedation status over time in ICU patients: reliability  
15 and validity of the Richmond Agitation–Sedation Scale (RASS). *JAMA* 2003;**289**:2983–91.  
16 doi:10.1001/jama.289.22.2983  
17  
18 44 Ely EW, Margolin R, Francis J, *et al.* Evaluation of delirium in critically ill patients: validation of the  
19 Confusion Assessment Method for the Intensive Care Unit (CAM-ICU). *Crit Care Med* 2001;**29**:1370–  
20 9.  
21  
22 45 Ely EW, Inouye SK, Bernard GR, *et al.* Delirium in mechanically ventilated patients: validity and  
23 reliability of the confusion assessment method for the intensive care unit (CAM-ICU). *JAMA*  
24 2001;**286**:2703–10.  
25  
26 46 Needham DM. Mobilizing Patients in the Intensive Care Unit: Improving Neuromuscular Weakness  
27 and Physical Function. *JAMA* 2008;**300**:1685–90. doi:10.1001/jama.300.14.1685  
28  
29 47 Harris PA, Taylor R, Thielke R, *et al.* Research Electronic Data Capture (REDCap) - A metadata-driven  
30 methodology and workflow process for providing translational research informatics support. *J*  
31 *Biomed Inform* 2009;**42**:377–81. doi:10.1016/j.jbi.2008.08.010  
32  
33 48 Teasdale G, Jennett B. Assessment of coma and impaired consciousness. A practical scale. *Lancet*  
34 *Lond Engl* 1974;**2**:81–4.  
35  
36 49 Semler MW, Self WH, Rice TW. Balanced Crystalloids versus Saline in Critically Ill Adults. *N Engl J*  
37 *Med* 2018;**378**:1951. doi:10.1056/NEJMc1804294  
38  
39 50 Zeger SL, Liang KY, Albert PS. Models for longitudinal data: a generalized estimating equation  
40 approach. *Biometrics* 1988;**44**:1049–60.  
41  
42 51 Turner RM, White IR, Croudace T, *et al.* Analysis of cluster randomized cross-over trial data: a  
43 comparison of methods. *Stat Med* 2007;**26**:274–89. doi:10.1002/sim.2537  
44  
45 52 Parienti J-J, Kuss O. Cluster-crossover design: a method for limiting clusters level effect in  
46 community-intervention studies. *Contemp Clin Trials* 2007;**28**:316–23.  
47 doi:10.1016/j.cct.2006.10.004  
48  
49 53 Food and Drug Administration (FDA). Multiple Endpoints in Clinical Trials: Guidance for Industry.  
50 Published Online First: January  
51  
52  
53  
54  
55  
56  
57  
58  
59  
60



1  
2  
3 2017.<https://www.fda.gov/downloads/drugs/guidancecomplianceregulatoryinformation/guidances/ucm536750.pdf>

4  
5  
6 54 European Medicines Agency. Guideline on multiplicity issues in clinical trials. Published Online First:  
7 December 2016.[https://www.ema.europa.eu/en/documents/scientific-guideline/draft-guideline-](https://www.ema.europa.eu/en/documents/scientific-guideline/draft-guideline-multiplicity-issues-clinical-trials_en.pdf)  
8 [multiplicity-issues-clinical-trials\\_en.pdf](https://www.ema.europa.eu/en/documents/scientific-guideline/draft-guideline-multiplicity-issues-clinical-trials_en.pdf)  
9

10 55 Uniform requirements for manuscripts submitted to biomedical journals. International Committee  
11 of Medical Journal Editors. *JAMA* 1997;**277**:927–34.  
12

13  
14 56 Esteban A, Alía I, Gordo F, *et al*. Extubation Outcome after Spontaneous Breathing Trials with T-  
15 Tube or Pressure Support Ventilation. *Am J Respir Crit Care Med* 1997;**156**:459–65.  
16 doi:10.1164/ajrccm.156.2.9610109  
17

18 57 Girault C, Bubenheim M, Abroug F, *et al*. Noninvasive Ventilation and Weaning in Patients with  
19 Chronic Hypercapnic Respiratory Failure. *Am J Respir Crit Care Med* 2011;**184**:672–9.  
20 doi:10.1164/rccm.201101-0035OC  
21  
22  
23  
24  
25  
26  
27  
28  
29  
30  
31  
32  
33  
34  
35  
36  
37  
38  
39  
40  
41  
42  
43  
44  
45  
46  
47  
48  
49  
50  
51  
52  
53  
54  
55  
56  
57  
58  
59  
60

## FIGURES

**Figure 1.** Standard Protocol Items: Recommendations for Interventional Trials (SPIRIT) checklist. Enrollment, Interventions, and Assessments.

**Figure 2.** Group assignment during the trial. During each three-month period of the study, one cluster is assigned to protocolized support (P), and the other to usual care (U).

**Figure 3.** Post-extubation respiratory support protocol. Visual summary of study protocol used at the bedside by a respiratory therapist caring for patients assigned to the protocolized support group.

| TIMEPOINT                       | STUDY PERIOD |            |                          |                             |                                       |
|---------------------------------|--------------|------------|--------------------------|-----------------------------|---------------------------------------|
|                                 | Allocation   | Enrollment | On-Study                 |                             | On-Study                              |
|                                 | Admission    | Extubation | 0-24 hrs post-extubation | 24-96 hours post-extubation | Discharge or 30 days after enrollment |
| <b>ENROLLMENT:</b>              |              | X          |                          |                             |                                       |
| Eligibility screen              | X            | X          |                          |                             |                                       |
| Allocation                      |              | X          |                          |                             |                                       |
| <b>INTERVENTIONS:</b>           |              |            |                          |                             |                                       |
| Protocolized Support            |              |            | X                        |                             |                                       |
| Screening for contraindications | X            | X          | X                        |                             |                                       |
| Usual Care                      |              |            | X                        |                             |                                       |
| Screening for contraindications | X            | X          | X                        |                             |                                       |
| <b>ASSESSMENTS:</b>             |              |            |                          |                             |                                       |
| Baseline Variables              | X            | X          |                          |                             |                                       |
| Peri-procedural variables       |              | X          | X                        | X                           |                                       |
| Clinical Outcomes               |              |            | X                        | X                           | X                                     |

Baseline variables are obtained from electronic medical record and include: indication for intubation, duration of invasive mechanical ventilation, risk factors for reintubation, respiratory rate at extubation, APACHE II score at ICU admission and at extubation, chronic hypercapnia, history of pulmonary disease, history of congestive heart failure, failure of previous spontaneous breathing trial, age, BMI, and other demographic details. Post-extubation variables include: the amount of time spent receiving prophylactic post-extubation respiratory support from 0-96 hours postintubation, the level of support provided with these devices, and the need for rescue treatment with NIV or HFNC to prevent reintubation within 96 hours of extubation. Clinical outcomes include: the need for reintubation within 96 hours (the primary outcome), time to reintubation, indication for reintubation, vital status, number of ventilator-free days to 28 days, and number of ICU-free days to 28 days.

1  
2  
3  
4  
5  
6  
7  
8  
9  
10  
11  
12  
13  
14  
15  
16  
17  
18  
19  
20  
21  
22  
23  
24  
25  
26  
27  
28  
29  
30  
31  
32  
33  
34  
35  
36  
37  
38  
39  
40  
41

|           | Oct '17 | Nov '17 | Dec '17 | Jan '18 | Feb '18 | Mar '18 | Apr '18 | May '18 | Jun '18 | Jul '18 | Aug '18 | Sep '18 | Oct '18 | Nov '18 | Dec '18 | Jan '19 | Feb '19 | Mar '19 |
|-----------|---------|---------|---------|---------|---------|---------|---------|---------|---------|---------|---------|---------|---------|---------|---------|---------|---------|---------|
| Cluster A | U       | U       | U       | P       | P       | P       | U       | U       | U       | P       | P       | P       | U       | U       | U       | P       | P       | P       |
| Cluster B | P       | P       | P       | U       | U       | U       | P       | P       | P       | U       | U       | U       | P       | P       | P       | U       | U       | U       |

# Post-Extubation Support Protocol

1  
2  
3  
4  
5  
6  
7  
8  
9  
10  
11  
12  
13  
14  
15  
16  
17  
18  
19  
20  
21  
22  
23  
24  
25  
26  
27  
28  
29  
30  
31  
32  
33  
34  
35  
36  
37  
38  
39  
40  
41  
42  
43  
44  
45  
46  
47  
48  
49  
50  
51  
52  
53  
54  
55  
56

**Patient undergoing extubation from  
invasive mechanical ventilation**

**Intubated > 12 hours?**

Yes

No

**Suspected hypercapnia\* or  
intubated for COPD Exacerbation**

Yes

No

**Excluded: management  
per treating clinicians**

**Extubate to  
non-invasive ventilation**

Full facemask should be used  
• 1 hour breaks allowed for meals  
Sedatives to increase tolerance are discouraged  
Transition to optiflow if patient has a contraindication to NIV\*\*, declines it, or is unable to tolerate it for > 4 hrs

**Extubate to  
high-flow nasal cannula**

- Non-invasive ventilation is acceptable alternative
- Rescue use of non-invasive ventilation for post-extubation respiratory distress per treating clinicians

**Continue support device until  
5AM on day following extubation**

\*Suspected hypercapnea defined as:  
1. PaCO<sub>2</sub> > 45 mmHg on ABG during SBT  
2. Chronic hypercarbic respiratory failure  
3. Obesity Hypoventilation Syndrome

\*\* Contraindications to NIV:  
1. Facial/cranial trauma  
2. Recent gastric/esophageal surgery  
3. Inability to protect the airway  
4. Active emesis or upper gastrointestinal bleeding  
5. Excessive respiratory secretions  
6. Lack of cooperation

**NIV or HFNC may be restarted after  
discontinuation for respiratory failure at  
discretion of clinical team**

**ONLINE SUPPLEMENT TO:**

**Protocolized Post-extubation Respiratory Support to Prevent Reintubation:**

**Protocol and Statistical Analysis Plan for a Randomized Trial**

Jonathan D. Casey, Erin M. Vaughn, Bradley D. Lloyd, Peter A. Bilas, Eric J. Hall, Alexandra H. Toporek, Kevin G. Buell, Ryan M. Brown, Roger K. Richardson, J. Craig Rooks, Li Wang, Chris J. Lindsell, E. Wesley Ely, Wesley H. Self, Gordon R. Bernard, Todd W. Rice, Matthew W. Semler for the Pragmatic Critical Care Research Group.

**Contents**

|                                                                                                                                                                   |    |
|-------------------------------------------------------------------------------------------------------------------------------------------------------------------|----|
| 1. Definitions .....                                                                                                                                              | 2  |
| 2. SPIRIT 2013 Checklist.....                                                                                                                                     | 5  |
| 3. Protocol for Daily Spontaneous Awakening Trial (SAT) Safety Screen, SAT Performance, Spontaneous Breathing Trial (SBT) Safety Screen, and SBT Performance..... | 12 |
| 4. Protocol for Assessment of Agitation (RASS score) .....                                                                                                        | 13 |
| 5. Protocol for Choice of Analgesia and Sedation in Mechanically Ventilated Patients.....                                                                         | 14 |
| 6. Protocol for Delirium Assessment (CAM-ICU) .....                                                                                                               | 15 |
| 7. Protocol for Early Mobility.....                                                                                                                               | 16 |
| 8. Development of the Model for the Primary Analysis .....                                                                                                        | 17 |
| 9. Plan for communication of protocol changes .....                                                                                                               | 18 |
| 10. Patient Privacy and Data Storage.....                                                                                                                         | 19 |
| 11. Patient Privacy and Data Storage.....                                                                                                                         | 20 |
| 12. Data Sharing Plan .....                                                                                                                                       | 21 |
| SUPPLEMENTAL FIGURES.....                                                                                                                                         | 22 |
| Figure S1. PROPER Consort Diagram Template .....                                                                                                                  | 22 |
| Figure S2. Protocol for Initiation, Titration, and Weaning of Non-Invasive Ventilation.....                                                                       | 23 |
| Figure S3. Protocol for Initiation, Titration, and Weaning of High Flow Nasal Cannula.....                                                                        | 24 |

## Supplemental Methods

### 1. Definitions

#### Study Intervention

**Post-extubation respiratory support:** respiratory support with non-invasive ventilation (NIV) or high-flow nasal cannula (HFNC), started immediately following extubation to prevent subsequent respiratory failure

**Rescue therapy:** respiratory support with non-invasive ventilation (NIV) or high-flow nasal cannula (HFNC), started minutes, hours, or days after extubation as treatment for respiratory failure

**Hours to discontinuation of post-extubation respiratory support:** number of hours from extubation to the permanent discontinuation of post-extubation respiratory support. Use of NIV or HFNC as rescue therapy will not be included.

**Duration of respiratory support within the first 24 hours:** number of hours spent receiving either NIV or HFNC as post-extubation respiratory support or as rescue therapy within the first 24 hours following extubation.

1  
2  
3 **Duration of HFNC within the first 24 hours:** number of hours spent receiving HFNC  
4  
5 as post-extubation respiratory support or as rescue therapy within the first 24 hours  
6  
7 following extubation.  
8  
9

10  
11  
12  
13 **Duration of NIV within the first 24 hours:** number of hours spent receiving NIV as  
14  
15 post-extubation respiratory support or as rescue therapy within the first 24 hours  
16  
17 following extubation.  
18  
19  
20  
21  
22  
23  
24  
25  
26  
27  
28  
29  
30  
31  
32  
33  
34  
35  
36  
37  
38  
39  
40  
41  
42  
43  
44  
45  
46  
47  
48  
49  
50  
51  
52  
53  
54  
55  
56  
57  
58  
59  
60



1  
2  
3 Outcomes:  
4  
5

6 **Ventilator Free Days (VFD):** Ventilator-free days are defined as the number of days  
7  
8 alive and breathing without assistance from the patient's final receipt of assisted  
9  
10 breathing to 28 days after enrollment. If a patient dies before day 28, VFD is 0. If a  
11  
12 patient is receiving assisted ventilation at day 28, VFD is 0. If the patient is discharged  
13  
14 while receiving assisted ventilation, VFD is 0. If a patient survives to discharge and is  
15  
16 never reintubated after enrollment, VFD is 28. Otherwise, VFD is calculated as 28  
17  
18 minus the study day on which the patient ultimately achieved unassisted breathing. All  
19  
20 data will be censored at the time of first hospital discharge or 28 days.  
21  
22  
23  
24  
25  
26  
27

28 **In-hospital mortality:** In-hospital mortality will be defined as death from any cause prior  
29  
30 to hospital discharge.  
31  
32  
33  
34  
35  
36  
37  
38  
39  
40  
41  
42  
43  
44  
45  
46  
47  
48  
49  
50  
51  
52  
53  
54  
55  
56  
57  
58  
59  
60

1  
2  
3  
4  
5  
6  
7  
8  
9  
10  
11  
12  
13  
14  
15  
16  
17  
18  
19  
20  
21  
22  
23  
24  
25  
26  
27  
28  
29  
30  
31  
32  
33  
34  
35  
36  
37  
38  
39  
40  
41  
42  
43  
44  
45  
46  
47

## 2. SPIRIT 2013 Checklist

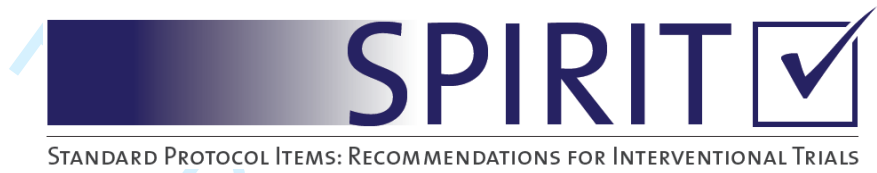

SPIRIT 2013 Checklist:

STANDARD PROTOCOL ITEMS: RECOMMENDATIONS FOR INTERVENTIONAL TRIALS

Recommended items to address in a clinical trial protocol and related documents\*

| Section/item                      | Item No | Description                                                                                                  | Addressed on page number |
|-----------------------------------|---------|--------------------------------------------------------------------------------------------------------------|--------------------------|
| <b>Administrative information</b> |         |                                                                                                              |                          |
| Title                             | 1       | Descriptive title identifying the study design, population, interventions, and, if applicable, trial acronym | <u>1, 3, 8</u>           |
| Trial registration                | 2a      | Trial identifier and registry name. If not yet registered, name of intended registry                         | <u>4, 9</u>              |
|                                   | 2b      | All items from the World Health Organization Trial Registration Data Set                                     | <u>1-4</u>               |
| Protocol version                  | 3       | Date and version identifier                                                                                  | <u>2</u>                 |
| Funding                           | 4       | Sources and types of financial, material, and other support                                                  | <u>2</u>                 |
|                                   | 5a      | Names, affiliations, and roles of protocol contributors                                                      | <u>1</u>                 |

|    |                            |    |                                                                                                                                                                                                                                                                                                   |
|----|----------------------------|----|---------------------------------------------------------------------------------------------------------------------------------------------------------------------------------------------------------------------------------------------------------------------------------------------------|
| 1  |                            |    |                                                                                                                                                                                                                                                                                                   |
| 2  |                            |    |                                                                                                                                                                                                                                                                                                   |
| 3  |                            |    |                                                                                                                                                                                                                                                                                                   |
| 4  | Roles and responsibilities | 5b | Name and contact information for the trial sponsor <u>1, 2, 9</u>                                                                                                                                                                                                                                 |
| 5  |                            |    |                                                                                                                                                                                                                                                                                                   |
| 6  |                            |    |                                                                                                                                                                                                                                                                                                   |
| 7  |                            | 5c | Role of study sponsor and funders, if any, in study design; collection, management, analysis, and interpretation of data; writing of the report; and the decision to submit the report for publication, including whether they will have ultimate authority over any of these activities <u>9</u> |
| 8  |                            |    |                                                                                                                                                                                                                                                                                                   |
| 9  |                            |    |                                                                                                                                                                                                                                                                                                   |
| 10 |                            |    |                                                                                                                                                                                                                                                                                                   |
| 11 |                            |    |                                                                                                                                                                                                                                                                                                   |
| 12 |                            |    |                                                                                                                                                                                                                                                                                                   |
| 13 |                            | 5d | Composition, roles, and responsibilities of the coordinating center, steering committee, endpoint adjudication committee, data management team, and other individuals or groups overseeing the trial, if applicable (see Item 21a for data monitoring committee) <u>1, 2</u>                      |
| 14 |                            |    |                                                                                                                                                                                                                                                                                                   |
| 15 |                            |    |                                                                                                                                                                                                                                                                                                   |
| 16 |                            |    |                                                                                                                                                                                                                                                                                                   |
| 17 |                            |    |                                                                                                                                                                                                                                                                                                   |
| 18 |                            |    |                                                                                                                                                                                                                                                                                                   |
| 19 |                            |    |                                                                                                                                                                                                                                                                                                   |
| 20 |                            |    |                                                                                                                                                                                                                                                                                                   |
| 21 |                            |    |                                                                                                                                                                                                                                                                                                   |
| 22 |                            |    |                                                                                                                                                                                                                                                                                                   |
| 23 |                            |    |                                                                                                                                                                                                                                                                                                   |
| 24 | <b>Introduction</b>        |    |                                                                                                                                                                                                                                                                                                   |
| 25 |                            |    |                                                                                                                                                                                                                                                                                                   |
| 26 | Background and rationale   | 6a | Description of research question and justification for undertaking the trial, including summary of relevant studies (published and unpublished) examining benefits and harms for each intervention <u>2</u>                                                                                       |
| 27 |                            |    |                                                                                                                                                                                                                                                                                                   |
| 28 |                            |    |                                                                                                                                                                                                                                                                                                   |
| 29 |                            |    |                                                                                                                                                                                                                                                                                                   |
| 30 |                            |    |                                                                                                                                                                                                                                                                                                   |
| 31 |                            | 6b | Explanation for choice of comparators <u>6-8</u>                                                                                                                                                                                                                                                  |
| 32 |                            |    |                                                                                                                                                                                                                                                                                                   |
| 33 | Objectives                 | 7  | Specific objectives or hypotheses <u>8</u>                                                                                                                                                                                                                                                        |
| 34 |                            |    |                                                                                                                                                                                                                                                                                                   |
| 35 |                            |    |                                                                                                                                                                                                                                                                                                   |
| 36 | Trial design               | 8  | Description of trial design including type of trial (eg, parallel group, crossover, factorial, single group), allocation ratio, and framework (eg, superiority, equivalence, noninferiority, exploratory) <u>9</u>                                                                                |
| 37 |                            |    |                                                                                                                                                                                                                                                                                                   |
| 38 |                            |    |                                                                                                                                                                                                                                                                                                   |
| 39 |                            |    |                                                                                                                                                                                                                                                                                                   |
| 40 |                            |    |                                                                                                                                                                                                                                                                                                   |
| 41 |                            |    |                                                                                                                                                                                                                                                                                                   |
| 42 |                            |    |                                                                                                                                                                                                                                                                                                   |
| 43 |                            |    |                                                                                                                                                                                                                                                                                                   |
| 44 |                            |    |                                                                                                                                                                                                                                                                                                   |
| 45 |                            |    |                                                                                                                                                                                                                                                                                                   |
| 46 |                            |    |                                                                                                                                                                                                                                                                                                   |
| 47 |                            |    |                                                                                                                                                                                                                                                                                                   |

**Methods: Participants, interventions, and outcomes**

|                      |     |                                                                                                                                                                                                                                                                                                                                                                                |               |
|----------------------|-----|--------------------------------------------------------------------------------------------------------------------------------------------------------------------------------------------------------------------------------------------------------------------------------------------------------------------------------------------------------------------------------|---------------|
| Study setting        | 9   | Description of study settings (eg, community clinic, academic hospital) and list of countries where data will be collected. Reference to where list of study sites can be obtained                                                                                                                                                                                             | <u>9</u>      |
| Eligibility criteria | 10  | Inclusion and exclusion criteria for participants. If applicable, eligibility criteria for study centers and individuals who will perform the interventions (eg, surgeons, psychotherapists)                                                                                                                                                                                   | <u>10</u>     |
| Interventions        | 11a | Interventions for each group with sufficient detail to allow replication, including how and when they will be administered                                                                                                                                                                                                                                                     | <u>11-15</u>  |
|                      | 11b | Criteria for discontinuing or modifying allocated interventions for a given trial participant (eg, drug dose change in response to harms, participant request, or improving/worsening disease)                                                                                                                                                                                 | <u>11-15</u>  |
|                      | 11c | Strategies to improve adherence to intervention protocols, and any procedures for monitoring adherence (eg, drug tablet return, laboratory tests)                                                                                                                                                                                                                              | <u>11-15</u>  |
|                      | 11d | Relevant concomitant care and interventions that are permitted or prohibited during the trial                                                                                                                                                                                                                                                                                  | <u>15</u>     |
| Outcomes             | 12  | Primary, secondary, and other outcomes, including the specific measurement variable (eg, systolic blood pressure), analysis metric (eg, change from baseline, final value, time to event), method of aggregation (eg, median, proportion), and time point for each outcome. Explanation of the clinical relevance of chosen efficacy and harm outcomes is strongly recommended | <u>18, 19</u> |

|                      |    |                                                                                                                                                                                       |                 |
|----------------------|----|---------------------------------------------------------------------------------------------------------------------------------------------------------------------------------------|-----------------|
| Participant timeline | 13 | Time schedule of enrolment, interventions (including any run-ins and washouts), assessments, and visits for participants. A schematic diagram is highly recommended (see Figure)      | <u>Figure 1</u> |
| Sample size          | 14 | Estimated number of participants needed to achieve study objectives and how it was determined, including clinical and statistical assumptions supporting any sample size calculations | <u>19-20</u>    |
| Recruitment          | 15 | Strategies for achieving adequate participant enrollment to reach target sample size                                                                                                  | <u>19-20</u>    |

### Methods: Assignment of interventions (for controlled trials)

#### Allocation:

|                                  |     |                                                                                                                                                                                                                                                                                                                                                           |               |
|----------------------------------|-----|-----------------------------------------------------------------------------------------------------------------------------------------------------------------------------------------------------------------------------------------------------------------------------------------------------------------------------------------------------------|---------------|
| Sequence generation              | 16a | Method of generating the allocation sequence (eg, computer-generated random numbers), and list of any factors for stratification. To reduce predictability of a random sequence, details of any planned restriction (eg, blocking) should be provided in a separate document that is unavailable to those who enroll participants or assign interventions | <u>10, 11</u> |
| Allocation concealment mechanism | 16b | Mechanism of implementing the allocation sequence (eg, central telephone; sequentially numbered, opaque, sealed envelopes), describing any steps to conceal the sequence until interventions are assigned                                                                                                                                                 | <u>10, 11</u> |
| Implementation                   | 16c | Who will generate the allocation sequence, who will enroll participants, and who will assign participants to interventions                                                                                                                                                                                                                                | <u>10, 11</u> |
| Blinding (masking)               | 17a | Who will be blinded after assignment to interventions (eg, trial participants, care providers, outcome assessors, data analysts), and how                                                                                                                                                                                                                 | <u>5</u>      |

1  
2  
3  
4  
5  
6  
7  
8  
9  
10  
11  
12  
13  
14  
15  
16  
17  
18  
19  
20  
21  
22  
23  
24  
25  
26  
27  
28  
29  
30  
31  
32  
33  
34  
35  
36  
37  
38  
39  
40  
41  
42  
43  
44  
45  
46  
47

|  |     |                                                                                                                                                      |          |
|--|-----|------------------------------------------------------------------------------------------------------------------------------------------------------|----------|
|  | 17b | If blinded, circumstances under which unblinding is permissible, and procedure for revealing a participant’s allocated intervention during the trial | <u>5</u> |
|--|-----|------------------------------------------------------------------------------------------------------------------------------------------------------|----------|

**Methods: Data collection, management, and analysis**

|                         |     |                                                                                                                                                                                                                                                                                                                                                                                                              |               |
|-------------------------|-----|--------------------------------------------------------------------------------------------------------------------------------------------------------------------------------------------------------------------------------------------------------------------------------------------------------------------------------------------------------------------------------------------------------------|---------------|
| Data collection methods | 18a | Plans for assessment and collection of outcome, baseline, and other trial data, including any related processes to promote data quality (eg, duplicate measurements, training of assessors) and a description of study instruments (eg, questionnaires, laboratory tests) along with their reliability and validity, if known. Reference to where data collection forms can be found, if not in the protocol | <u>16-19</u>  |
|                         | 18b | Plans to promote participant retention and complete follow-up, including list of any outcome data to be collected for participants who discontinue or deviate from intervention protocols                                                                                                                                                                                                                    | <u>16,17</u>  |
| Data management         | 19  | Plans for data entry, coding, security, and storage, including any related processes to promote data quality (eg, double data entry; range checks for data values). Reference to where details of data management procedures can be found, if not in the protocol                                                                                                                                            | <u>2</u>      |
| Statistical methods     | 20a | Statistical methods for analyzing primary and secondary outcomes. Reference to where other details of the statistical analysis plan can be found, if not in the protocol                                                                                                                                                                                                                                     | <u>21-22</u>  |
|                         | 20b | Methods for any additional analyses (eg, subgroup and adjusted analyses)                                                                                                                                                                                                                                                                                                                                     | <u>22-26</u>  |
|                         | 20c | Definition of analysis population relating to protocol non-adherence (eg, as randomized analysis), and any statistical methods to handle missing data (eg, multiple imputation)                                                                                                                                                                                                                              | <u>26, 27</u> |

**Methods: Monitoring**

|    |                                 |     |                                                                                                                                                                                                                                                                                                                                       |
|----|---------------------------------|-----|---------------------------------------------------------------------------------------------------------------------------------------------------------------------------------------------------------------------------------------------------------------------------------------------------------------------------------------|
| 1  |                                 |     |                                                                                                                                                                                                                                                                                                                                       |
| 2  |                                 |     |                                                                                                                                                                                                                                                                                                                                       |
| 3  |                                 |     |                                                                                                                                                                                                                                                                                                                                       |
| 4  | Data monitoring                 | 21a | Composition of data monitoring committee (DMC); summary of its role and reporting structure; statement of whether it is independent from the sponsor and competing interests; and reference to where further details about its charter can be found, if not in the protocol. Alternatively, an explanation of why a DMC is not needed |
| 5  |                                 |     | <u>20, 21</u>                                                                                                                                                                                                                                                                                                                         |
| 6  |                                 |     |                                                                                                                                                                                                                                                                                                                                       |
| 7  |                                 |     |                                                                                                                                                                                                                                                                                                                                       |
| 8  |                                 |     |                                                                                                                                                                                                                                                                                                                                       |
| 9  |                                 | 21b | Description of any interim analyses and stopping guidelines, including who will have access to these interim results and make the final decision to terminate the trial                                                                                                                                                               |
| 10 |                                 |     | <u>16, 17</u>                                                                                                                                                                                                                                                                                                                         |
| 11 |                                 |     |                                                                                                                                                                                                                                                                                                                                       |
| 12 |                                 |     |                                                                                                                                                                                                                                                                                                                                       |
| 13 | Harms                           | 22  | Plans for collecting, assessing, reporting, and managing solicited and spontaneously reported adverse events and other unintended effects of trial interventions or trial conduct                                                                                                                                                     |
| 14 |                                 |     | <u>16, 17</u>                                                                                                                                                                                                                                                                                                                         |
| 15 |                                 |     |                                                                                                                                                                                                                                                                                                                                       |
| 16 |                                 |     |                                                                                                                                                                                                                                                                                                                                       |
| 17 | Auditing                        | 23  | Frequency and procedures for auditing trial conduct, if any, and whether the process will be independent from investigators and the sponsor                                                                                                                                                                                           |
| 18 |                                 |     | <u>N/A</u>                                                                                                                                                                                                                                                                                                                            |
| 19 |                                 |     |                                                                                                                                                                                                                                                                                                                                       |
| 20 |                                 |     |                                                                                                                                                                                                                                                                                                                                       |
| 21 | <b>Ethics and dissemination</b> |     |                                                                                                                                                                                                                                                                                                                                       |
| 22 |                                 |     |                                                                                                                                                                                                                                                                                                                                       |
| 23 | Research ethics approval        | 24  | Plans for seeking research ethics committee/institutional review board (REC/IRB) approval                                                                                                                                                                                                                                             |
| 24 |                                 |     | <u>9, 28</u>                                                                                                                                                                                                                                                                                                                          |
| 25 |                                 |     |                                                                                                                                                                                                                                                                                                                                       |
| 26 | Protocol amendments             | 25  | Plans for communicating important protocol modifications (eg, changes to eligibility criteria, outcomes, analyses) to relevant parties (eg, investigators, REC/IRBs, trial participants, trial registries, journals, regulators)                                                                                                      |
| 27 |                                 |     | <u>S19</u>                                                                                                                                                                                                                                                                                                                            |
| 28 |                                 |     |                                                                                                                                                                                                                                                                                                                                       |
| 29 |                                 |     |                                                                                                                                                                                                                                                                                                                                       |
| 30 |                                 |     |                                                                                                                                                                                                                                                                                                                                       |
| 31 | Consent or assent               | 26a | Who will obtain informed consent or assent from potential trial participants or authorized surrogates, and how (see Item 32)                                                                                                                                                                                                          |
| 32 |                                 |     | <u>27, 28</u>                                                                                                                                                                                                                                                                                                                         |
| 33 |                                 |     |                                                                                                                                                                                                                                                                                                                                       |
| 34 |                                 |     |                                                                                                                                                                                                                                                                                                                                       |
| 35 |                                 | 26b | Additional consent provisions for collection and use of participant data and biological specimens in ancillary studies, if applicable                                                                                                                                                                                                 |
| 36 |                                 |     | <u>27, 28</u>                                                                                                                                                                                                                                                                                                                         |
| 37 |                                 |     |                                                                                                                                                                                                                                                                                                                                       |
| 38 |                                 |     |                                                                                                                                                                                                                                                                                                                                       |
| 39 | Confidentiality                 | 27  | How personal information about potential and enrolled participants will be collected, shared, and maintained in order to protect confidentiality before, during, and after the trial                                                                                                                                                  |
| 40 |                                 |     | <u>S20</u>                                                                                                                                                                                                                                                                                                                            |
| 41 |                                 |     |                                                                                                                                                                                                                                                                                                                                       |
| 42 |                                 |     |                                                                                                                                                                                                                                                                                                                                       |
| 43 |                                 |     |                                                                                                                                                                                                                                                                                                                                       |
| 44 |                                 |     |                                                                                                                                                                                                                                                                                                                                       |
| 45 |                                 |     |                                                                                                                                                                                                                                                                                                                                       |
| 46 |                                 |     |                                                                                                                                                                                                                                                                                                                                       |
| 47 |                                 |     |                                                                                                                                                                                                                                                                                                                                       |

1  
2  
3  
4  
5  
6  
7  
8  
9  
10  
11  
12  
13  
14  
15  
16  
17  
18  
19  
20  
21  
22  
23  
24  
25  
26  
27  
28  
29  
30  
31  
32  
33  
34  
35  
36  
37  
38  
39  
40  
41  
42  
43  
44  
45  
46  
47

|                               |     |                                                                                                                                                                                                                                                                                     |             |
|-------------------------------|-----|-------------------------------------------------------------------------------------------------------------------------------------------------------------------------------------------------------------------------------------------------------------------------------------|-------------|
| Declaration of interests      | 28  | Financial and other competing interests for principal investigators for the overall trial and each study site                                                                                                                                                                       | <u>2</u>    |
| Access to data                | 29  | Statement of who will have access to the final trial dataset, and disclosure of contractual agreements that limit such access for investigators                                                                                                                                     | <u>2, 9</u> |
| Ancillary and post-trial care | 30  | Provisions, if any, for ancillary and post-trial care, and for compensation to those who suffer harm from trial participation                                                                                                                                                       | <u>N/A</u>  |
| Dissemination policy          | 31a | Plans for investigators and sponsor to communicate trial results to participants, healthcare professionals, the public, and other relevant groups (eg, via publication, reporting in results databases, or other data sharing arrangements), including any publication restrictions | <u>29</u>   |
|                               | 31b | Authorship eligibility guidelines and any intended use of professional writers                                                                                                                                                                                                      | <u>1</u>    |
|                               | 31c | Plans, if any, for granting public access to the full protocol, participant-level dataset, and statistical code                                                                                                                                                                     | <u>21</u>   |
| <b>Appendices</b>             |     |                                                                                                                                                                                                                                                                                     |             |
| Informed consent materials    | 32  | Model consent form and other related documentation given to participants and authorized surrogates                                                                                                                                                                                  | <u>N/A</u>  |
| Biological specimens          | 33  | Plans for collection, laboratory evaluation, and storage of biological specimens for genetic or molecular analysis in the current trial and for future use in ancillary studies, if applicable                                                                                      | <u>N/A</u>  |

---

\*It is strongly recommended that this checklist be read in conjunction with the SPIRIT 2013 Explanation & Elaboration for important clarification on the items. Amendments to the protocol should be tracked and dated. The SPIRIT checklist is copyrighted by the SPIRIT Group under the Creative Commons "[Attribution-NonCommercial-NoDerivs 3.0 Unported](http://creativecommons.org/licenses/by-nc-nd/3.0/)" license.



3. Protocol for Daily Spontaneous Awakening Trial (SAT) Safety Screen, SAT Performance, Spontaneous Breathing Trial (SBT) Safety Screen, and SBT Performance

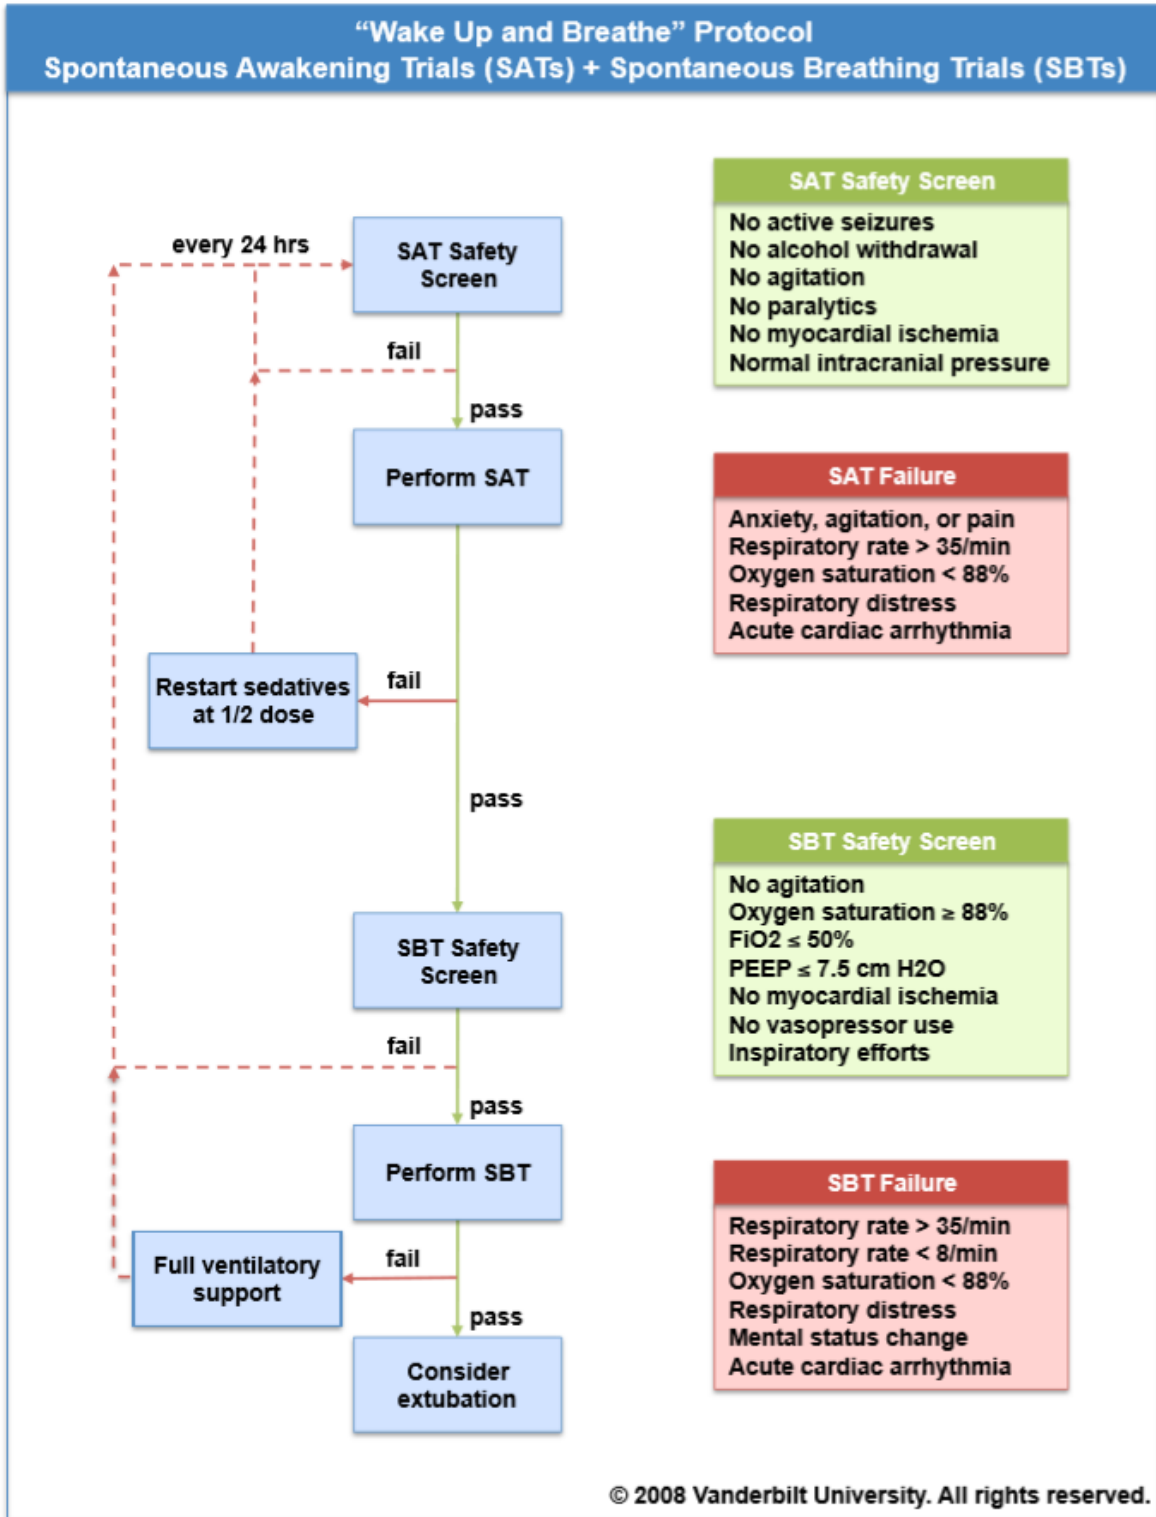

## 4. Protocol for Assessment of Agitation (RASS score)



## 5. Protocol for Choice of Analgesia and Sedation in Mechanically Ventilated Patients

- Analgesia
  - a. Intermittent Dosing
    - i. Fentanyl 50 mcg IV push every 15 minutes to goal CPOT  $\leq 3$ , then 50mcg IV push every 2 hours as needed to maintain a CPOT  $\leq 3$
    - ii. Hydromorphone 0.2 mg IV push every 15 minutes to goal CPOT  $\leq 3$ , then 0.2 mg IV push every 4 hours as needed to maintain CPOT  $\leq 3$
    - iii. Morphine 2 mg IV push every 15 minutes to goal CPOT  $\leq 3$ , then 2 mg IV push as needed to maintain CPOT  $\leq 3$
  - b. Continuous Infusions
    - i. None
    - ii. Fentanyl infusion 50mcg/hr, titrate by 25 mcg/hr every 15 minutes to goal CPOT score  $\leq 3$ . Max infusion rate 400mcg/hr. NHO when CPOT target not met with maximum rate.
    - iii. Morphine infusion 2mg/hr, titrate by 0.5mg/hr every 15 minutes to goal CPOT score  $\leq 3$ . Max infusion rate 20 mg/hr. NHO when CPOT target not met with maximum rate.
- Sedation
  - a. None (if RASS at goal with analgesia-based regimen)
  - b. Propofol Infusion 5mcg/kg/min, titrate by 5mcg/kg/min every 15 minutes to goal RASS. Max rate of 50mcg/kg/min. NHO when RASS target not met with maximum rate.
  - c. Dexmedetomidine Infusion 0.2mcg/kg/hr, titrate by 0.1 mcg/kg/hr every 15 minutes to goal RASS. Max rate 1.5 mcg/kg/hr. NHO when RASS target not met with maximum rate.

For propofol intolerance consider one of the following:

  - d. Midazolam 1mg IV push every 2 hours as needed to meet goal RASS.
  - e. Midazolam Infusion 0.5mg/hr, titrate by 0.5mg/hr every 15 minutes to achieve goal RASS. Max infusion rate 10mg/hr. NHO when RASS target not met with maximum rate.

(Propofol intolerance refers to propofol infusion syndrome, hemodynamic instability precluding propofol use, elevated creatinine phosphokinase (CPK) >5000 International units/L, triglycerides >500mg/dl, or propofol use >96 hours)

## 6. Protocol for Delirium Assessment (CAM-ICU)



### 7. Protocol for Early Mobility



Only

## 8. Development of the Model for the Primary Analysis

In preparation for PROPER, we collected data on the provision of post-extubation respiratory support and the incidence of reintubation from 420 patients who met inclusion/exclusion criteria for PROPER in a 12-month period (6/1/2015 to 5/31/2016) prior to the trial. Using generalized linear mixed-effects modeling treating the two geographic regions of the unit as clusters and the four 3-month blocks as periods, we calculated the intra-cluster correlation coefficient to be  $<0.001$ , the intra-period correlation coefficient to be  $<0.001$ , and the intra-cluster intra-period correlation coefficient to be  $<0.001$ .

### 9. Plan for communication of protocol changes

Any changes to the trial protocol (eg, changes to eligibility criteria, outcomes, analyses) will require a new version of the full trial protocol which will be tracked with the date of the update and the version number of the trial protocol. A list summarizing the changes that are made with each protocol revision will be included at the end of each protocol. The updated protocol will be sent to the Vanderbilt IRB for tracking and approval prior to implementation of the protocol change. At the time of publication, the original trial protocol and the final trial protocol, including the summary of changes made with each protocol change, will be included in the supplementary material for publication.

## 10. Patient Privacy and Data Storage

At no time during the course of this study, its analysis, or its publication will patient identities be revealed in any manner. The minimum necessary data containing patient or provider identities is collected. All patients are assigned a unique study ID number for tracking. Data collected from the medical record is entered into the secure online database REDCap. Hard copies of the data collection sheet completed at the time of the airway management event are stored in a locked room until after the completion of enrollment and data cleaning. Once data are verified and the database is locked, all hard copies of data collection forms will be destroyed. All data is maintained in the secure online database REDCap until the time of study publication. At the time of publication, a de-identified database will be generated.



## 11. Patient Privacy and Data Storage

At no time during the course of this study, its analysis, or its publication will patient identities be revealed in any manner. The minimum necessary data containing patient or provider identities is collected. All patients are assigned a unique study ID number for tracking. Data collected from the medical record is entered into the secure online database REDCap. Hard copies of the data collection sheet completed at the time of the airway management event are stored in a locked room until after the completion of enrollment and data cleaning. Once data are verified and the database is locked, all hard copies of data collection forms will be destroyed. All data is maintained in the secure online database REDCap until the time of study publication. At the time of publication, a de-identified database will be generated.

## 12. Data Sharing Plan

Upon reasonable request, a completely de-identified data set may be provided by the authors. Request to share data from the PROPER trial should be sent to the principal investigator, Jonathan Casey, MD at Jonathan.D.Casey@vumc.org. The data set will be provided to researchers whose proposed use of the data has been approved by the steering committee and an Institutional Review Board.

For peer review only

**SUPPLEMENTAL FIGURES**

**Figure S1. PROPER Consort Diagram Template**



## Figure S2. Protocol for Initiation, Titration, and Weaning of Non-Invasive Ventilation

### Consensus Protocols for Non-Invasive Ventilation (BiPAP) Initiation, Titration and Weaning

#### Initiating and Titrating Non-invasive Ventilation:

1. Initiate NIV with IPAP = 14 and EPAP =8 (or home settings if available)
2. Set back up respiratory rate to 12
3. Titrate fraction inspired oxygen (FIO<sub>2</sub>) to maintain oxygen saturation > 90%
4. Titrate IPAP/EPAP settings to achieve:
  - a. Minute Ventilation of > 5.0 and < 10.0 liters per minute
  - b. Respiratory rate < 30
  - c. Maximum IPAP of 20 cm/H<sub>2</sub>O

#### Weaning Non-Invasive Ventilation:

Patient clinically improving with:

- FIO weaned to 40%
- Respiratory rate <25
- Minute Ventilation <10 l/m
- O<sub>2</sub> Sat > 90%

Yes

- Reduce IPAP to 10
- Reduce EPAP to 5
- Reduce back up RR to 8
- Maintain FiO<sub>2</sub> of 40%

→ Patient clinically stable after 1 hour?

Yes

- Place V60 on Standby
- Transfer Patient Oxygen Administration Protocol

No

No

**Figure S3. Protocol for Initiation, Titration, and Weaning of High Flow Nasal Cannula**

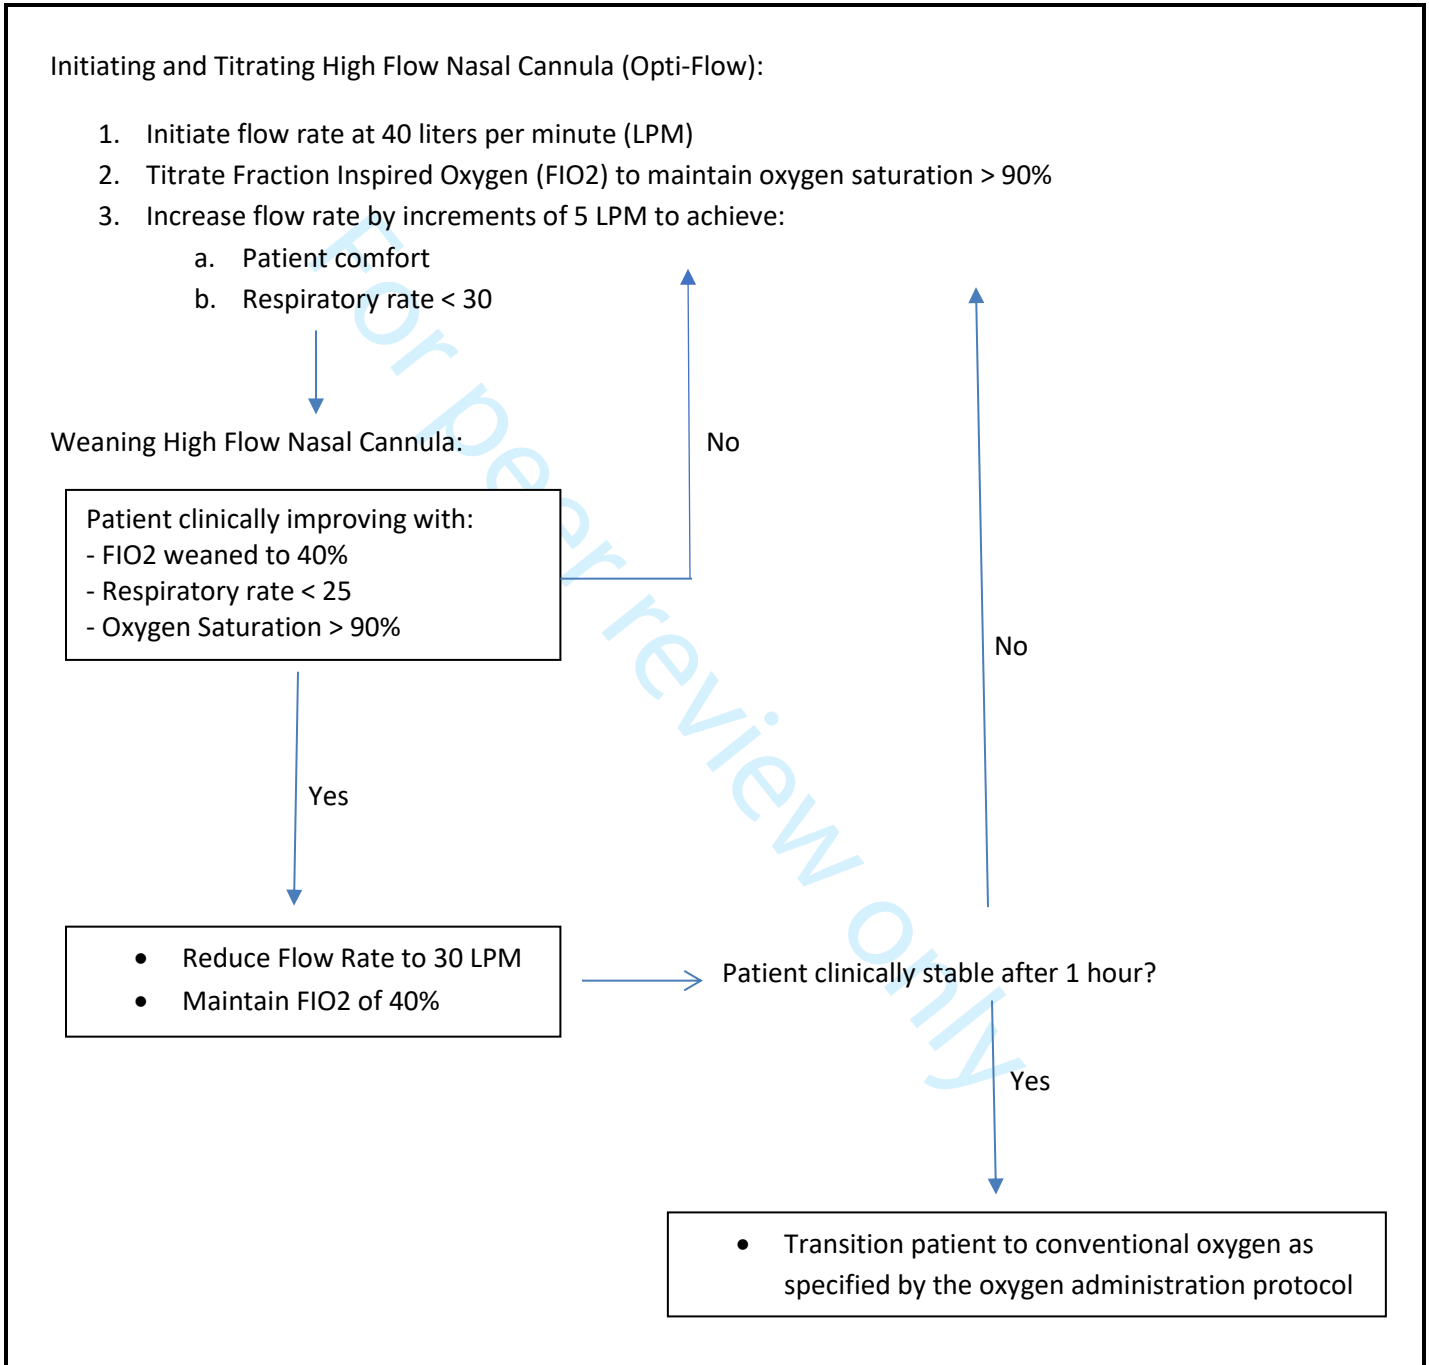

Supplement: bmjopen-2019-030476.draft_revisions.pdf [file bmjopen-2019-030476.draft_revisions.pdf]
